# Supplementary material for: Stannylene cyanide and its use as a cyanosilylation catalyst
Source: Royal Society of Chemistry journal article supplement (doi:10.1039/d2dt02721f), 2022-01-01
Supplement: d2dt02721f1.pdf [file d2dt02721f1.pdf]

**Supporting Information**

**Stannylene Cyanide and its Use as Cyanosilylation Catalyst**

Vivek Kumar Singh, Prakash Chandra Joshi, Hemant Kumar, Rahul Kumar Siwatch, Chandan Kumar Jha, and Selvarajan Nagendran\*

Department of Chemistry, Indian Institute of Technology Delhi, Hauz Khas, New Delhi 110016,  
India

## CONTENTS

|                 |                                                                                                                                                                                                                                        | Page no. |
|-----------------|----------------------------------------------------------------------------------------------------------------------------------------------------------------------------------------------------------------------------------------|----------|
| Chart S1        | Low-valent main group catalysts for the hydroboration of carbonyl compounds                                                                                                                                                            | 4        |
| Chart S2        | Low-valent main group catalysts for the cyanosilylation of carbonyl compounds                                                                                                                                                          | 5        |
| Figures S1-S16  | NMR spectra of compounds <b>2-6</b>                                                                                                                                                                                                    | 6-21     |
| Figure S17      | IR spectrum of compound <b>5</b>                                                                                                                                                                                                       | 22       |
| Table S1        | Crystal data and structure refinement for compounds <b>2-4</b> and <b>6</b>                                                                                                                                                            | 23-24    |
|                 | General procedure for the cyanosilylation of aldehydes using compound <b>5</b> as a catalyst                                                                                                                                           | 25       |
| Figures S18-S30 | <sup>1</sup> H NMR spectra for the entries in Table 1                                                                                                                                                                                  | 25-37    |
|                 | NMR data for the cyanosilylated products reported in Table 2                                                                                                                                                                           | 38-43    |
| Figures S31-S76 | <sup>1</sup> H and <sup>13</sup> C NMR spectra of the cyanosilylated products in Table 2                                                                                                                                               | 44-89    |
|                 | General procedure for the intermolecular chemoselective cyanosilylation using catalyst <b>5</b> (eqns 1-3)                                                                                                                             | 90       |
| Figures S77-S82 | <sup>1</sup> H and <sup>13</sup> C NMR spectra of the reactions shown in eqns 1-3                                                                                                                                                      | 90-95    |
| Figure S83      | The <sup>1</sup> H NMR spectrum of the equimolar reaction of compound <b>5</b> with acetophenone. The spectrum was recorded after 4 h of adding acetophenone                                                                           | 96       |
| Table S2        | The equimolar reactions of catalyst <b>5</b> with hexanaldehyde, benzaldehyde, 4-chlorobenzaldehyde, and 2,6-dichlorobenzaldehyde to afford cyanostannylated products <b>S1</b> , <b>S2</b> , <b>S3</b> , and <b>S4</b> , respectively | 97       |
| Figures S84-S91 | The <sup>1</sup> H and <sup>119</sup> Sn NMR spectra of compounds <b>S1-S4</b>                                                                                                                                                         | 98-105   |
| Figure S92      | The <sup>1</sup> H NMR spectrum of the reaction of benzaldehyde with TMSCN at 50 °C in the presence of 0.5 mol% of compound <b>6</b>                                                                                                   | 106      |
| Figures S93-S96 | The plots of ln[A] versus t for the benzaldehyde cyanosilylation done at four different temperatures (40, 50, 60, and 70 °C)                                                                                                           | 107-110  |

|            |                                                                                                                                                                                                                                          |     |
|------------|------------------------------------------------------------------------------------------------------------------------------------------------------------------------------------------------------------------------------------------|-----|
| Figure S97 | The Arrhenius plot of $\ln(k)$ versus $1/T$                                                                                                                                                                                              | 111 |
| Figure S98 | $^1\text{H}$ NMR spectrum of the reaction of compound <b>6</b> with TMSCN to afford cyanosilylated product <b>7</b> and catalyst <b>5</b> . The spectrum was recorded after 0.5 h from adding a slight excess TMSCN to compound <b>6</b> | 112 |

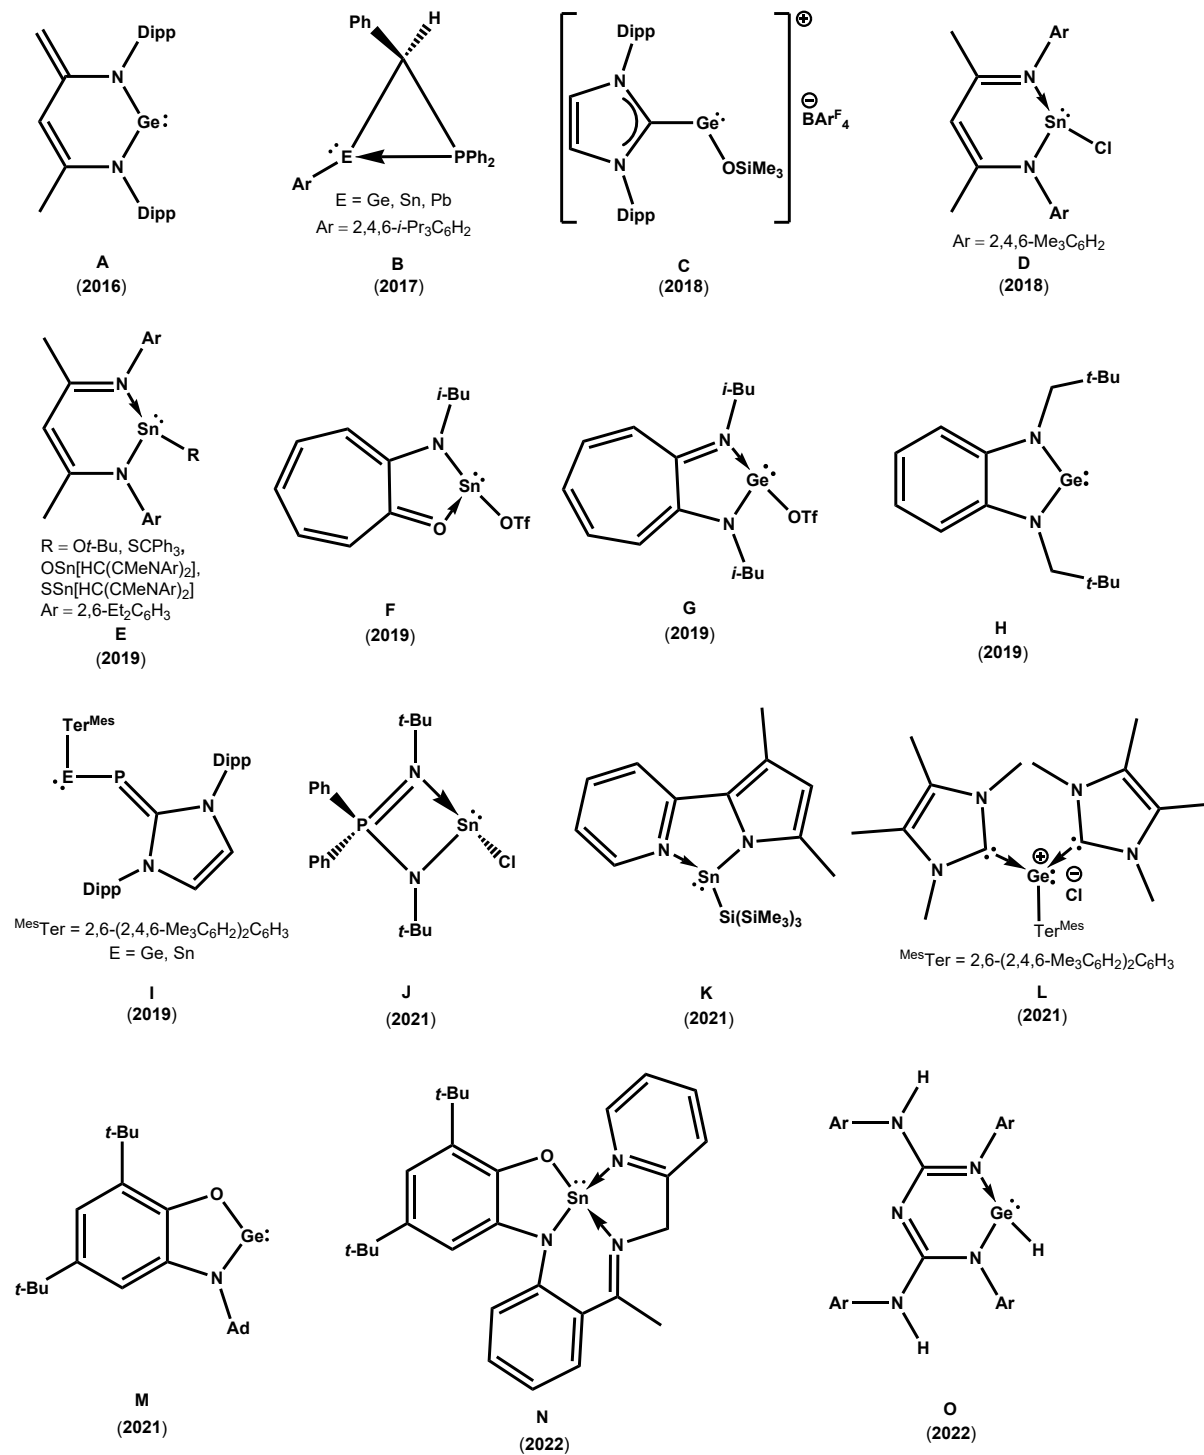

**Chart S1.** Low-valent main group catalysts for the hydroboration of carbonyl compounds.

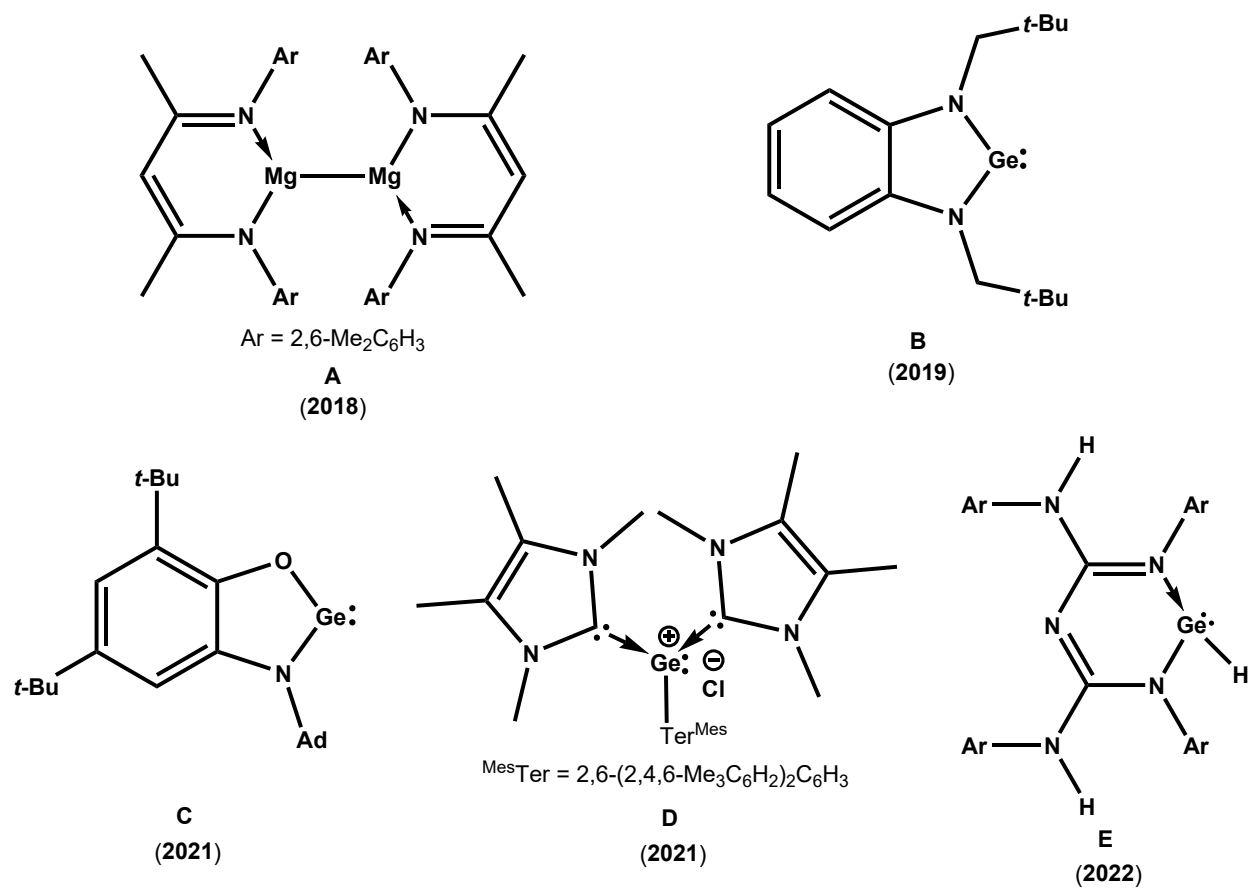

**Chart S2.** Low-valent main group catalysts for the cyanosilylation of carbonyl compounds.

## NMR spectra of compounds 2-6

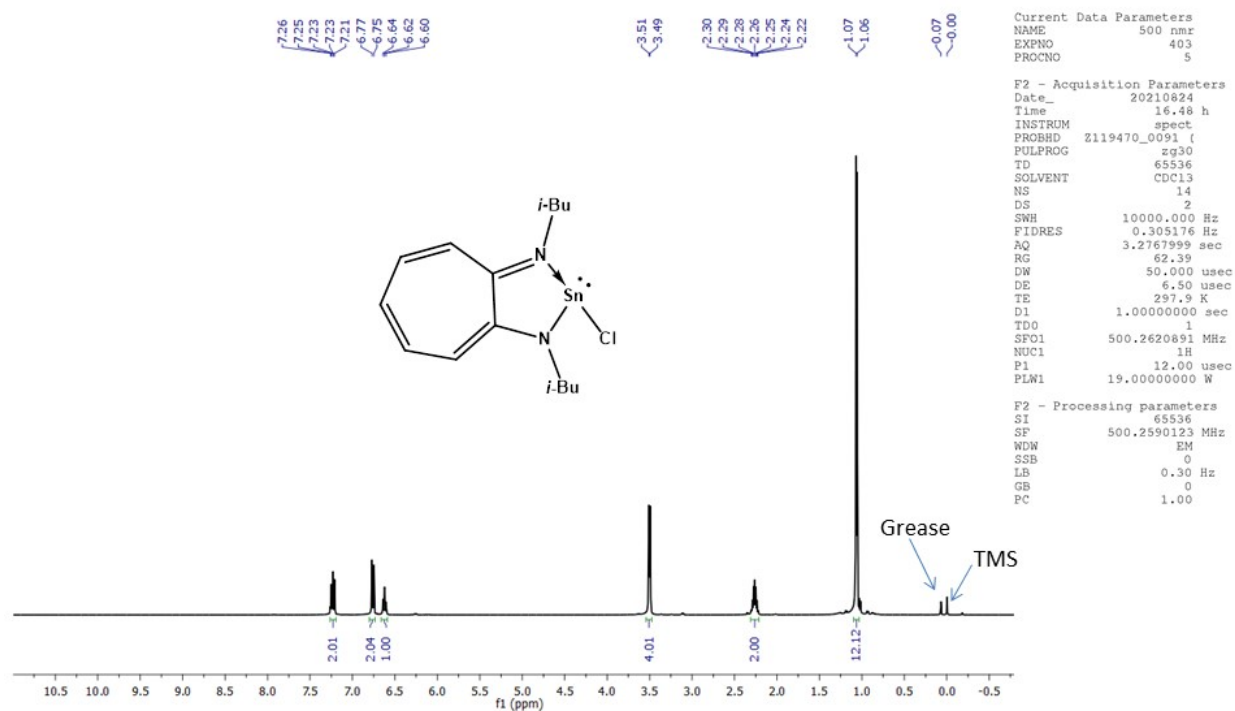

**Figure S1.** <sup>1</sup>H NMR spectrum of compound 2.

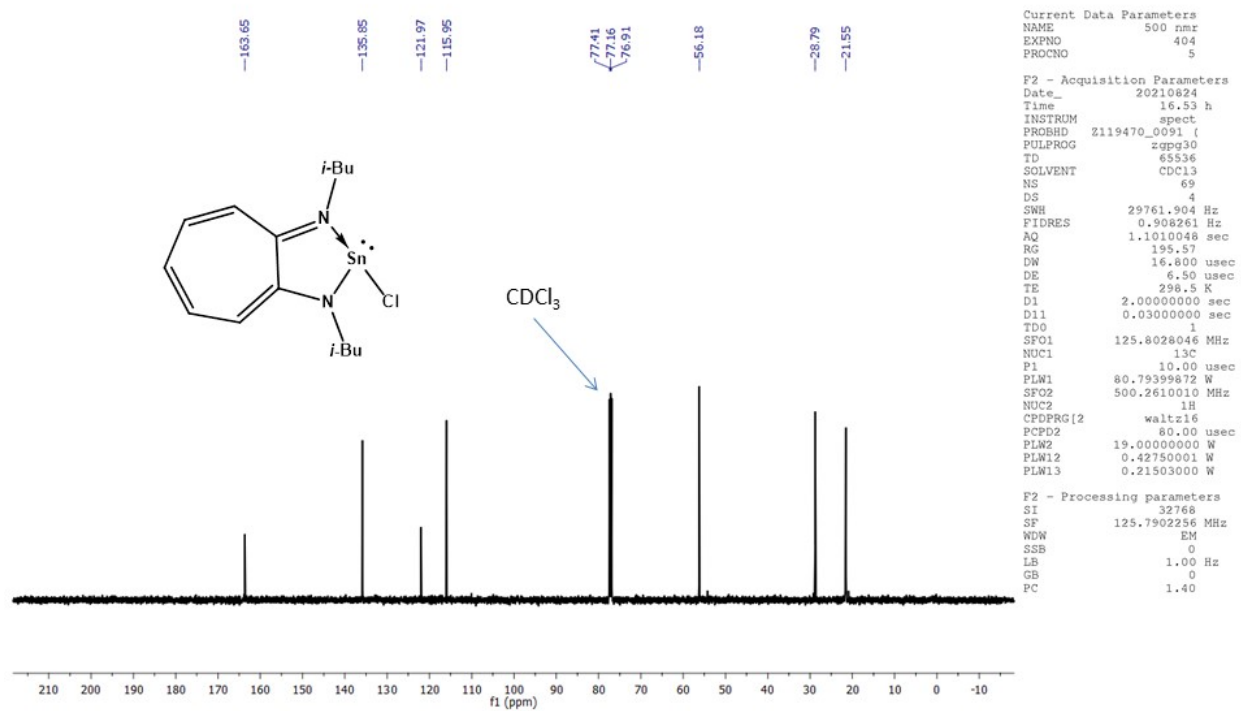

Figure S2. <sup>13</sup>C NMR spectrum of compound 2.

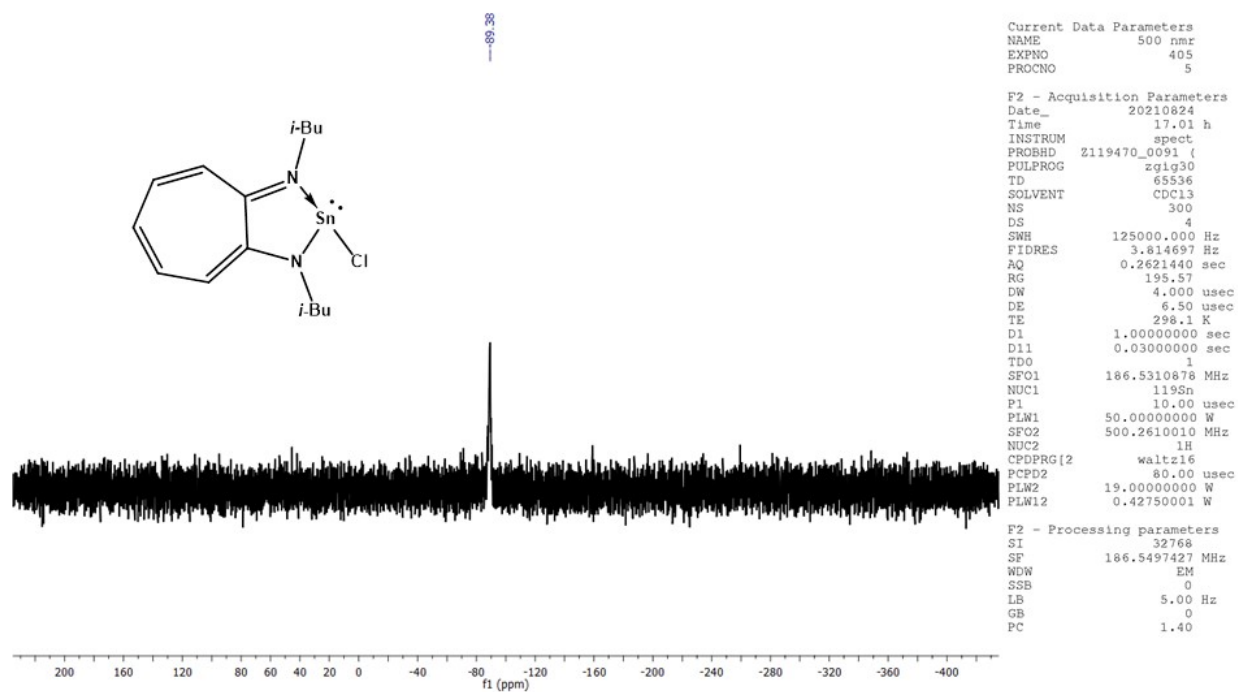

**Figure S3.**  $^{119}\text{Sn}$  NMR spectrum of compound 2.

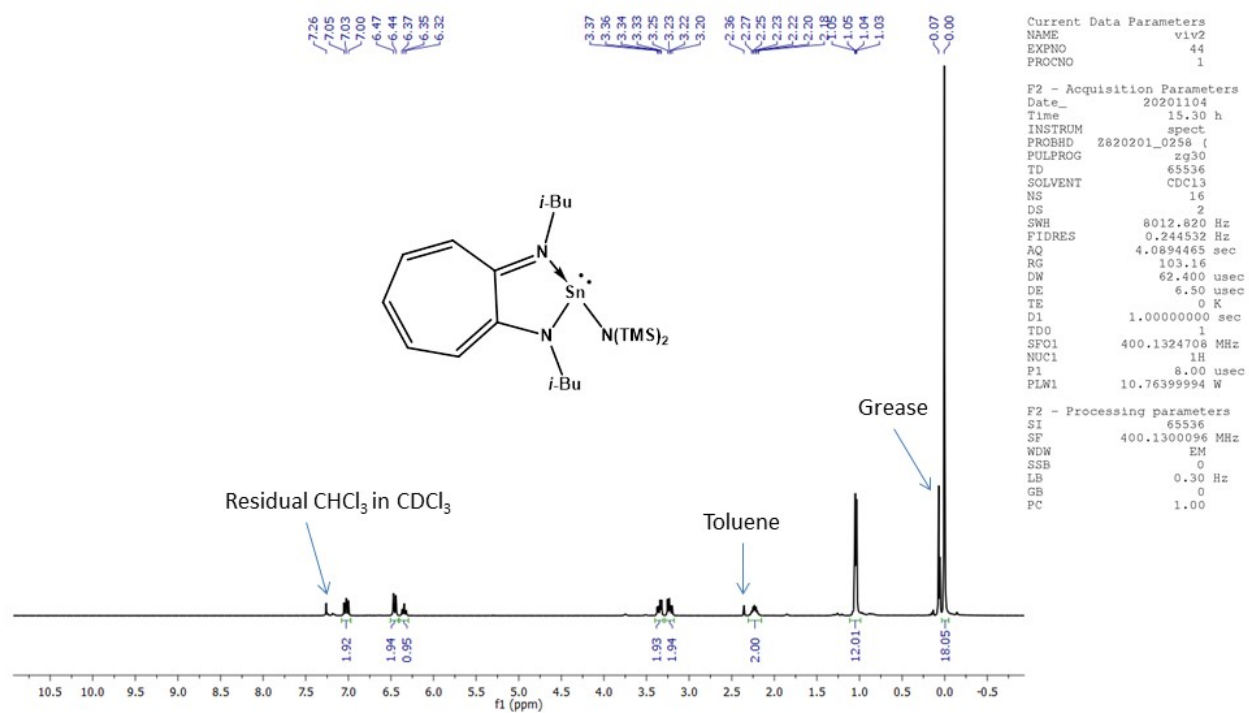

**Figure S4.**  $^1\text{H}$  NMR spectrum of compound 3.

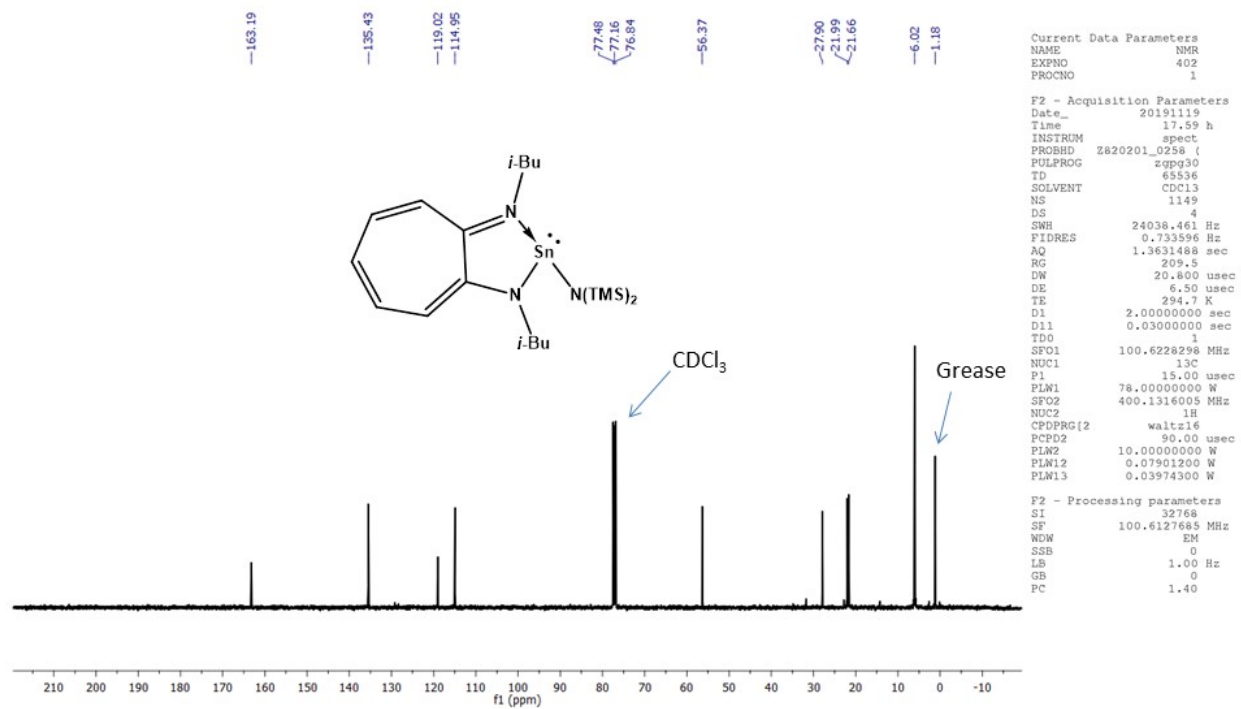

Figure S5. <sup>13</sup>C NMR spectrum of compound 3.

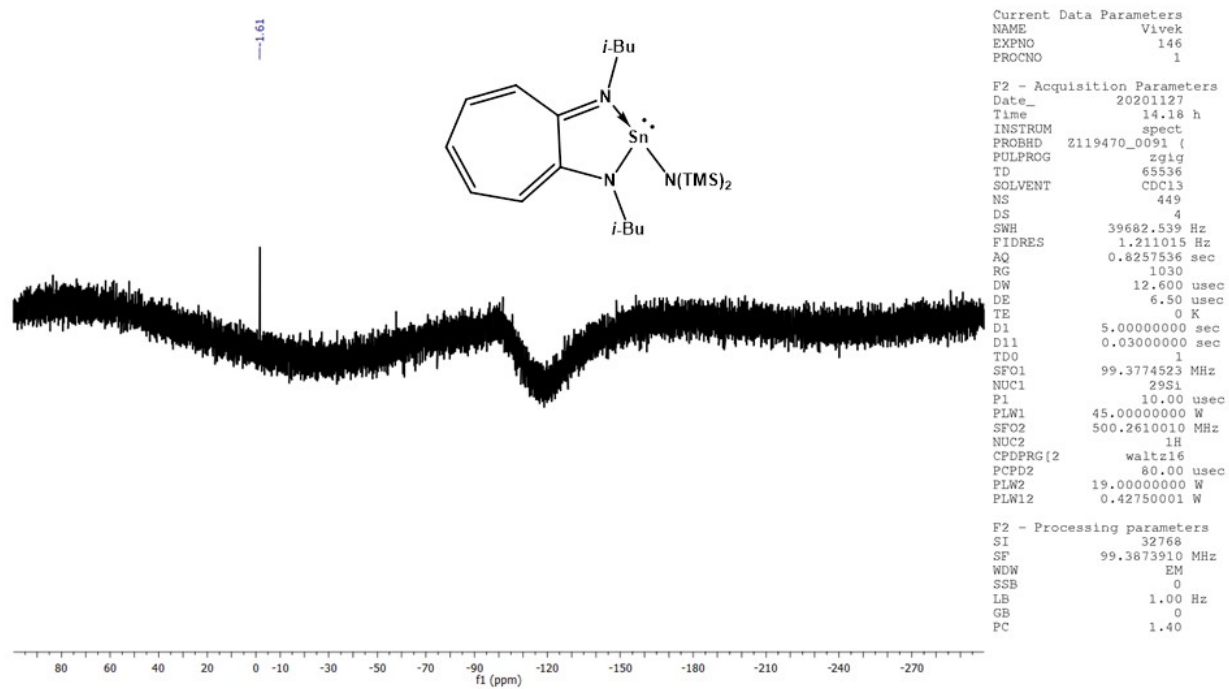

**Figure S6.**  $^{29}\text{Si}$  NMR spectrum of compound **3**.

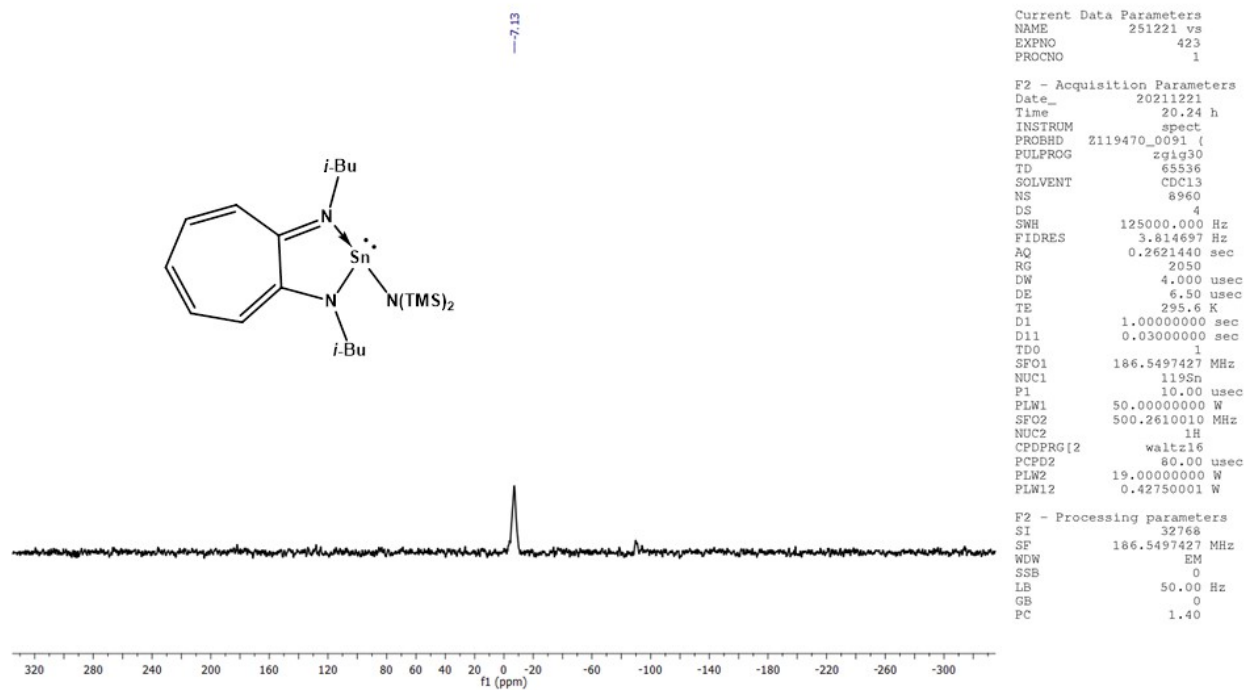

**Figure S7.**  $^{119}\text{Sn}$  NMR spectrum of compound **3**.

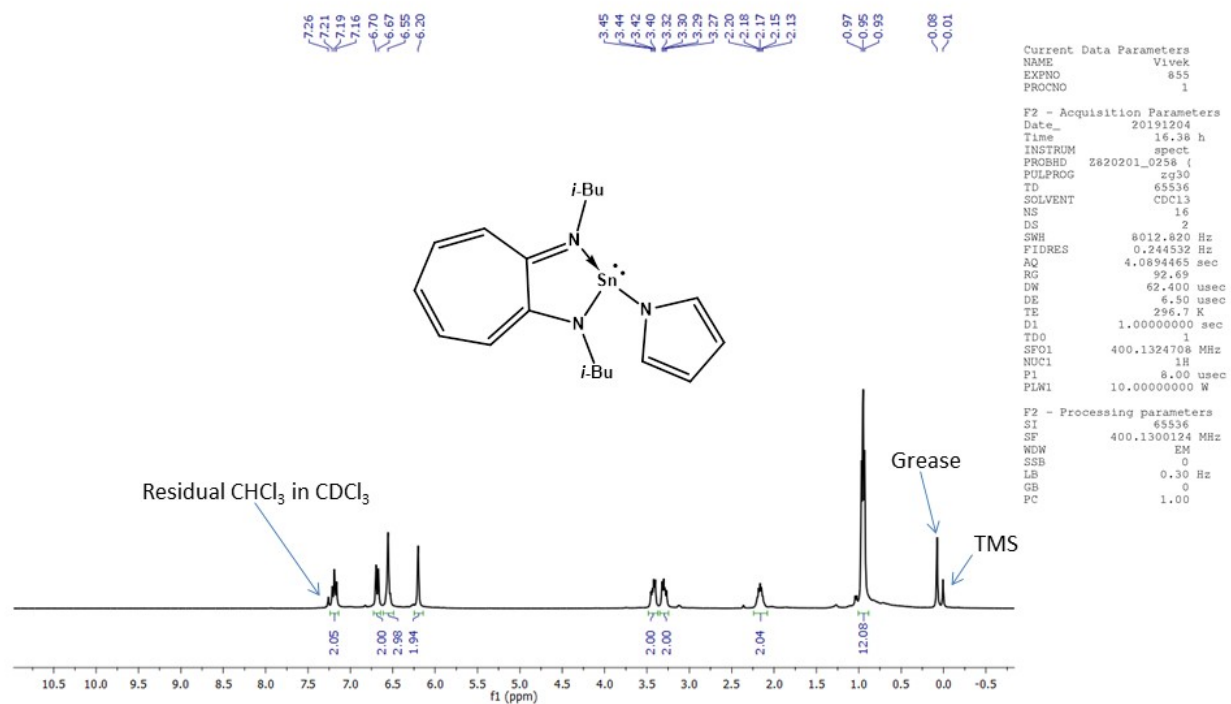

**Figure S8.** <sup>1</sup>H NMR spectrum of compound 4.

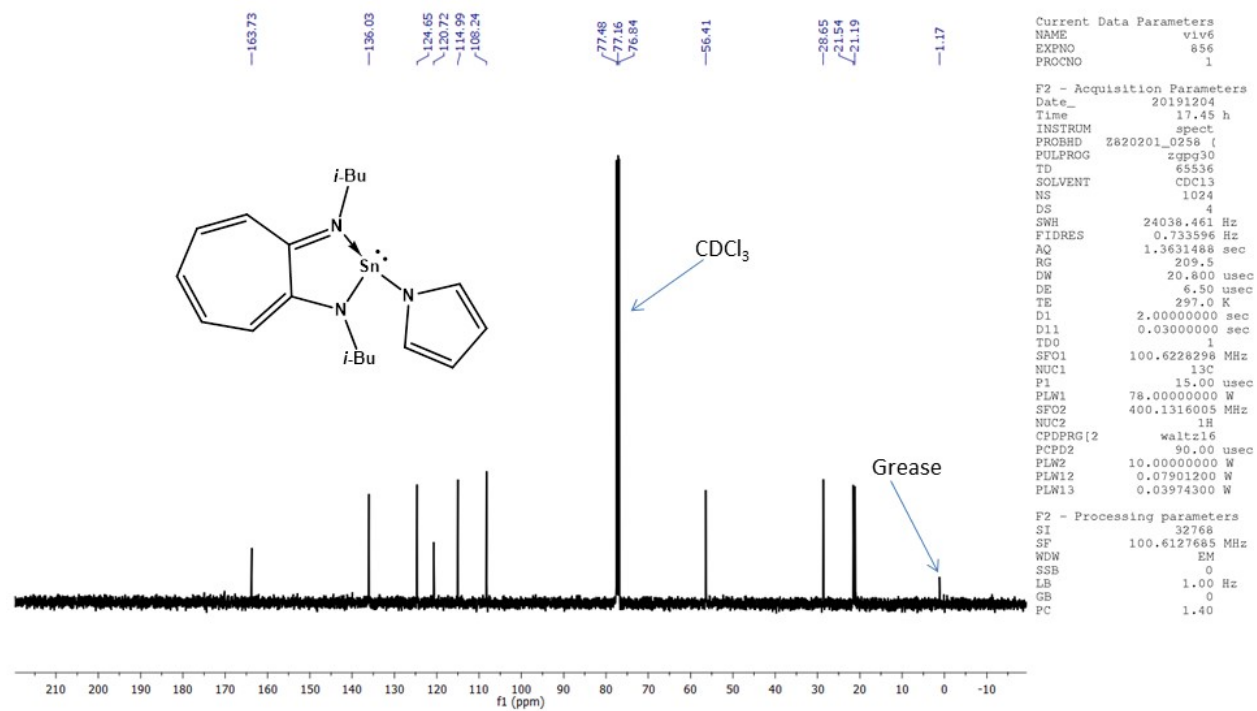

Figure S9. <sup>13</sup>C NMR spectrum of compound 4.

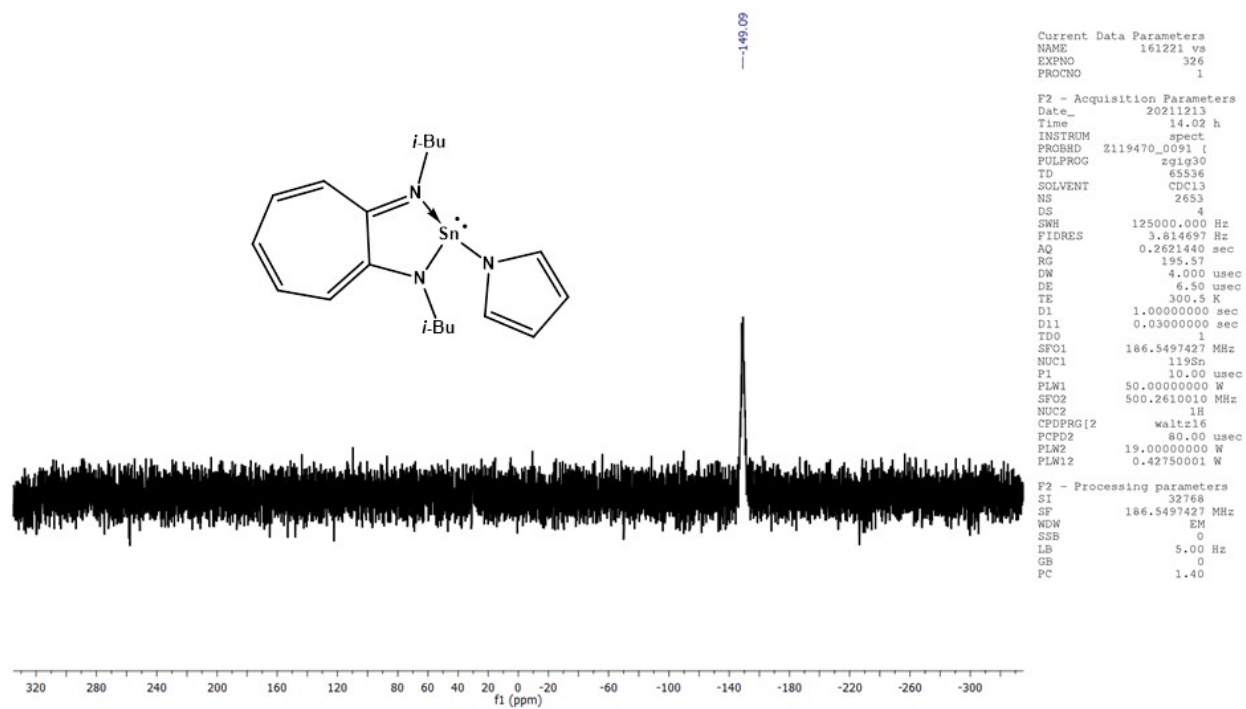

**Figure S10.**  $^{119}\text{Sn}$  NMR spectrum of compound **4**.

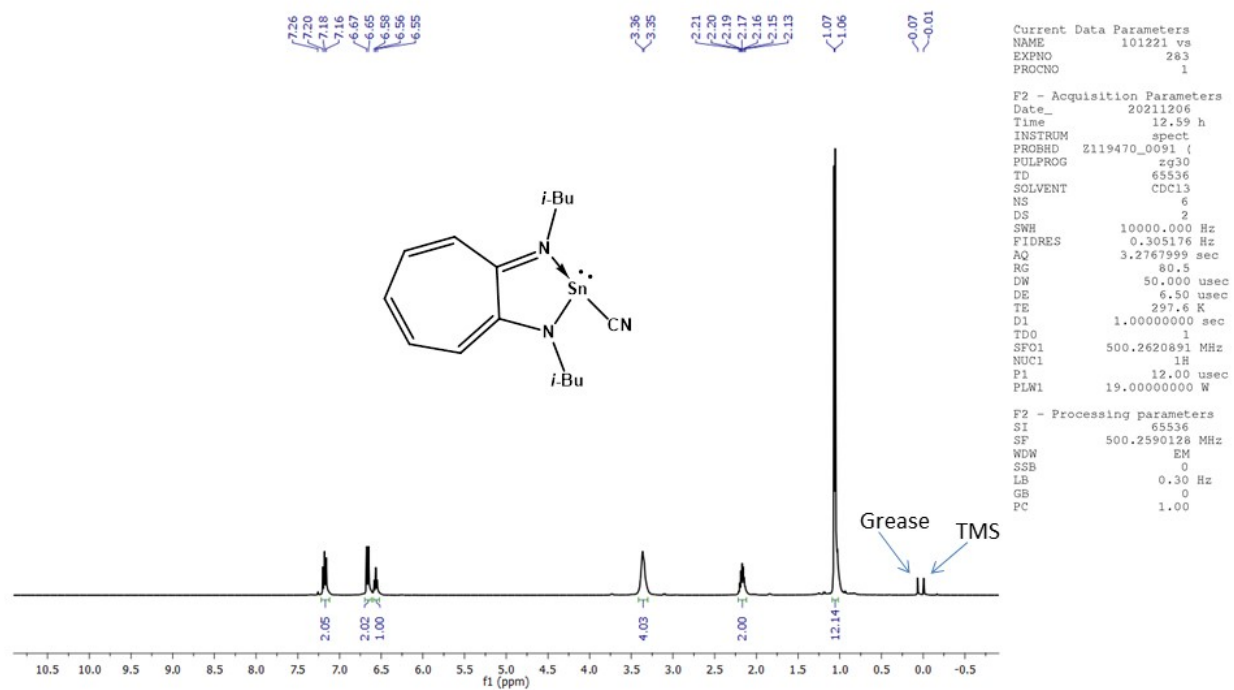

**Figure S11.** <sup>1</sup>H NMR spectrum of compound 5.

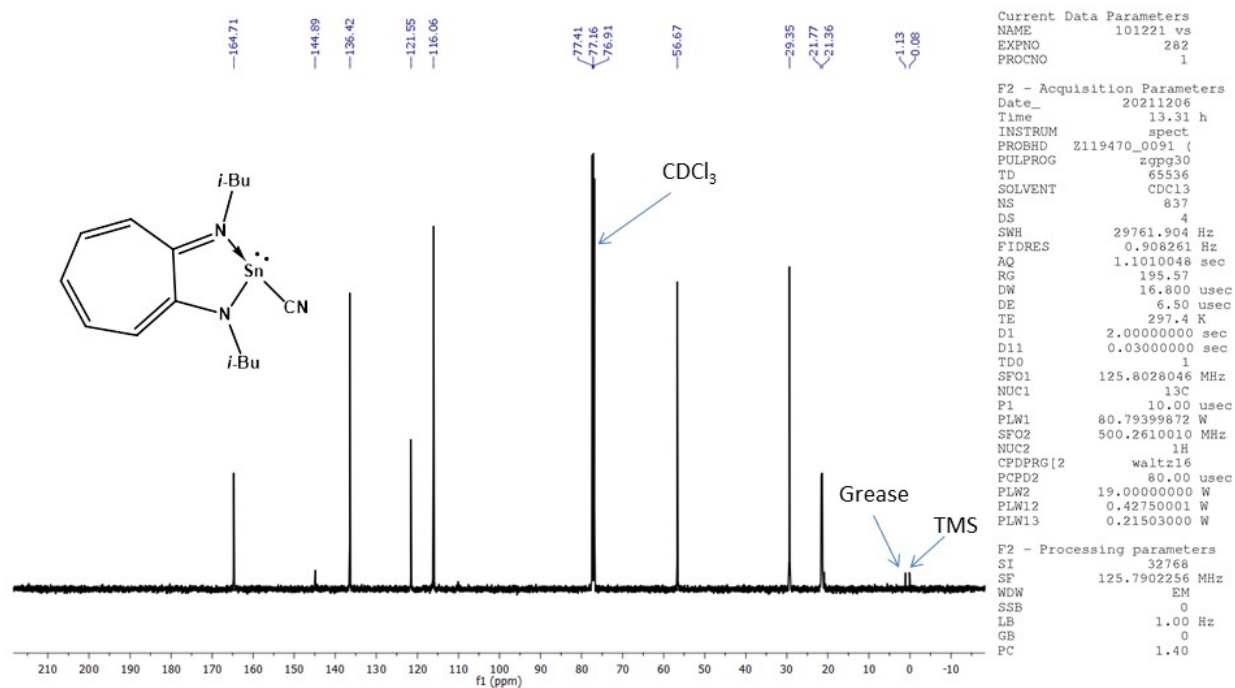

**Figure S12.** <sup>13</sup>C NMR spectrum of compound 5.

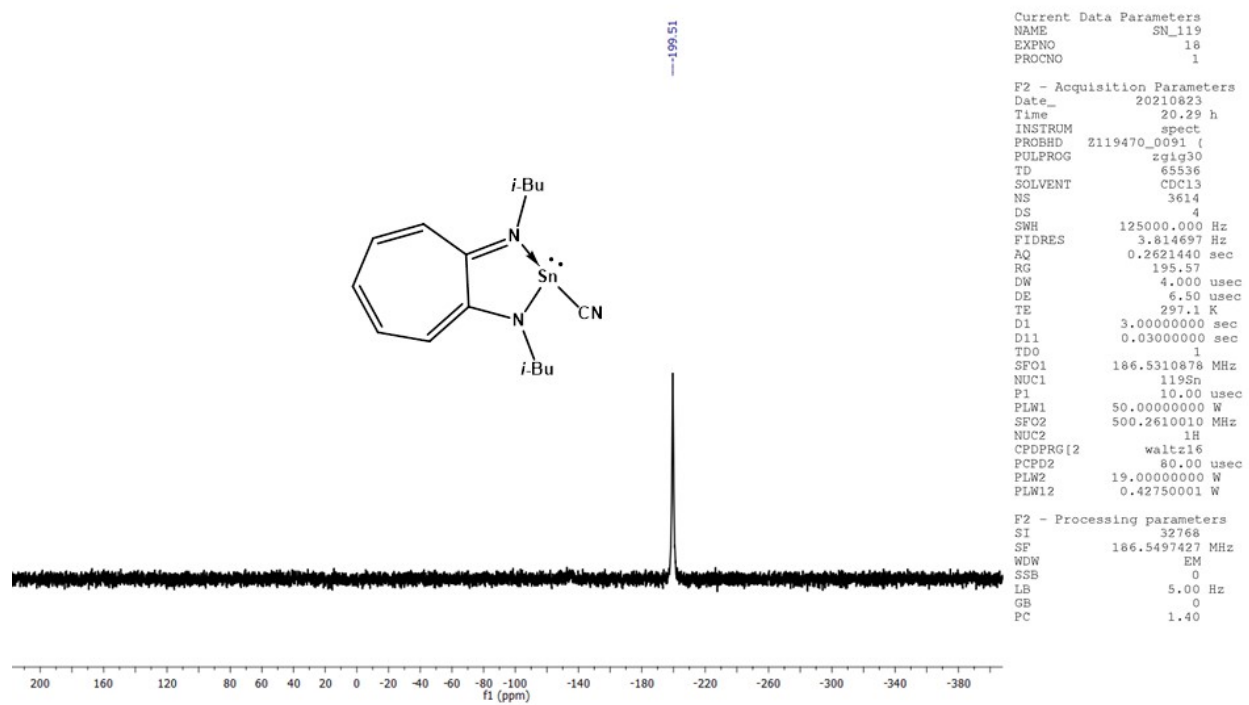

**Figure S13.**  $^{119}\text{Sn}$  NMR spectrum of compound 5.

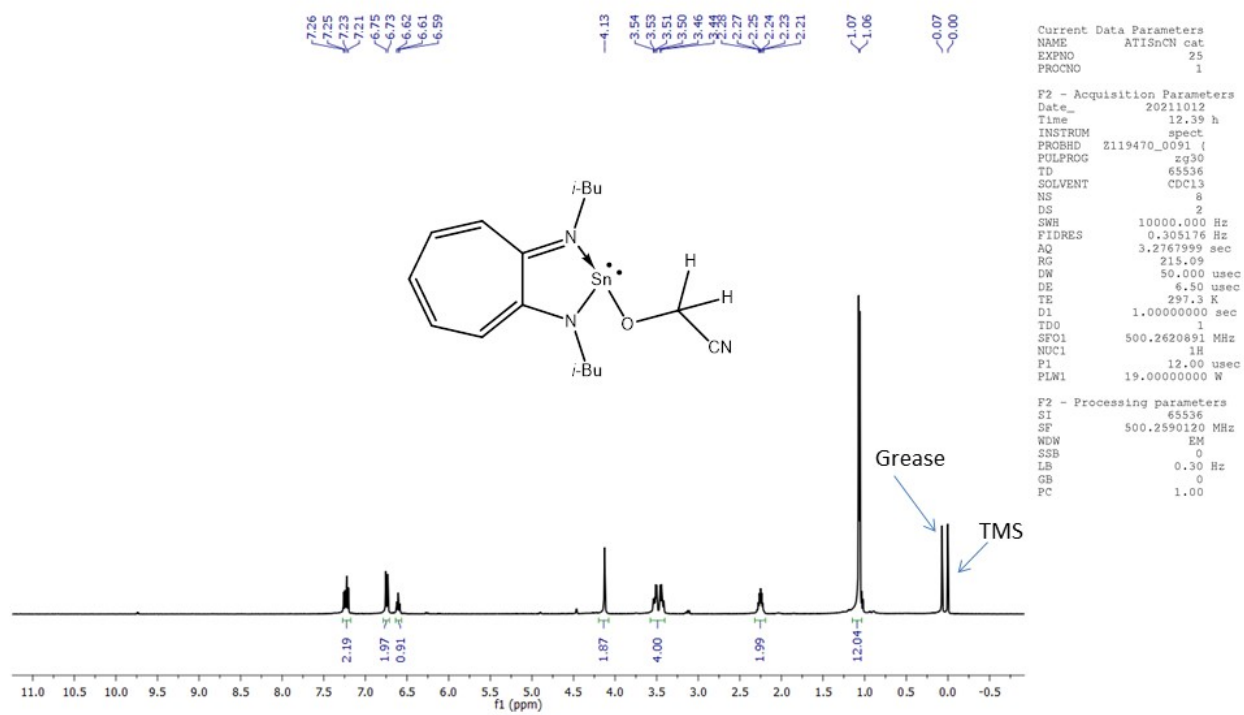

**Figure S144.** <sup>1</sup>H NMR spectrum of compound 6.

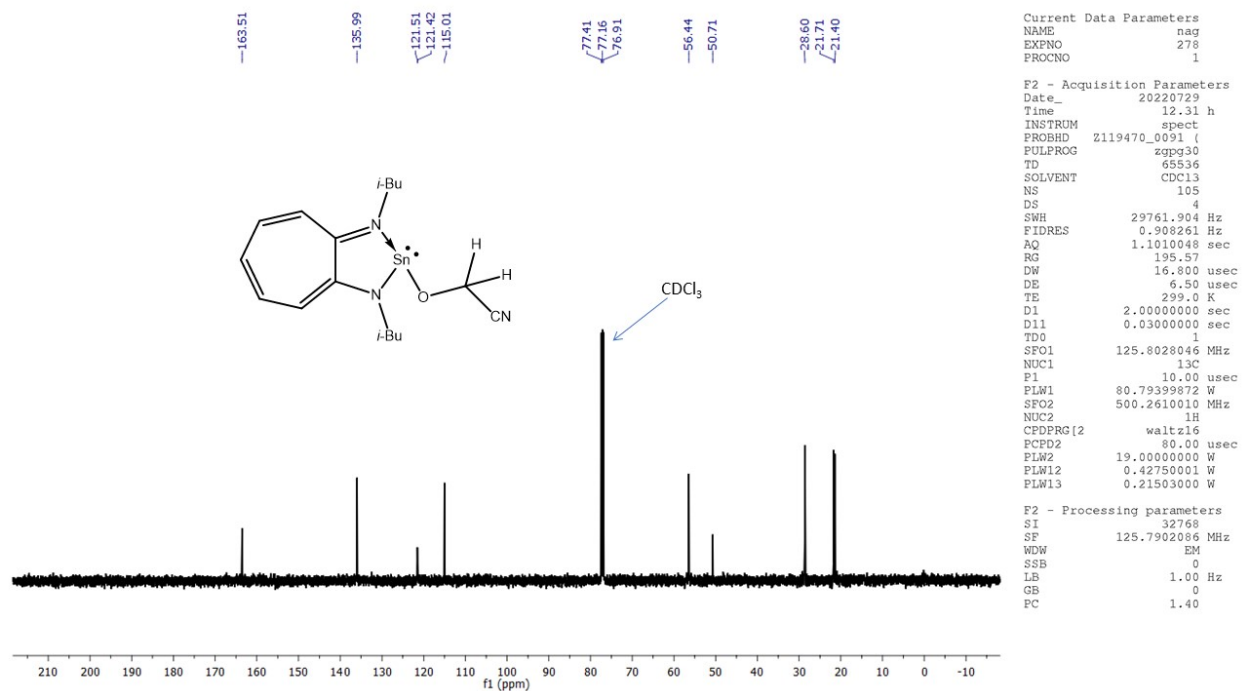

Figure S155. <sup>13</sup>C NMR spectrum of compound 6.

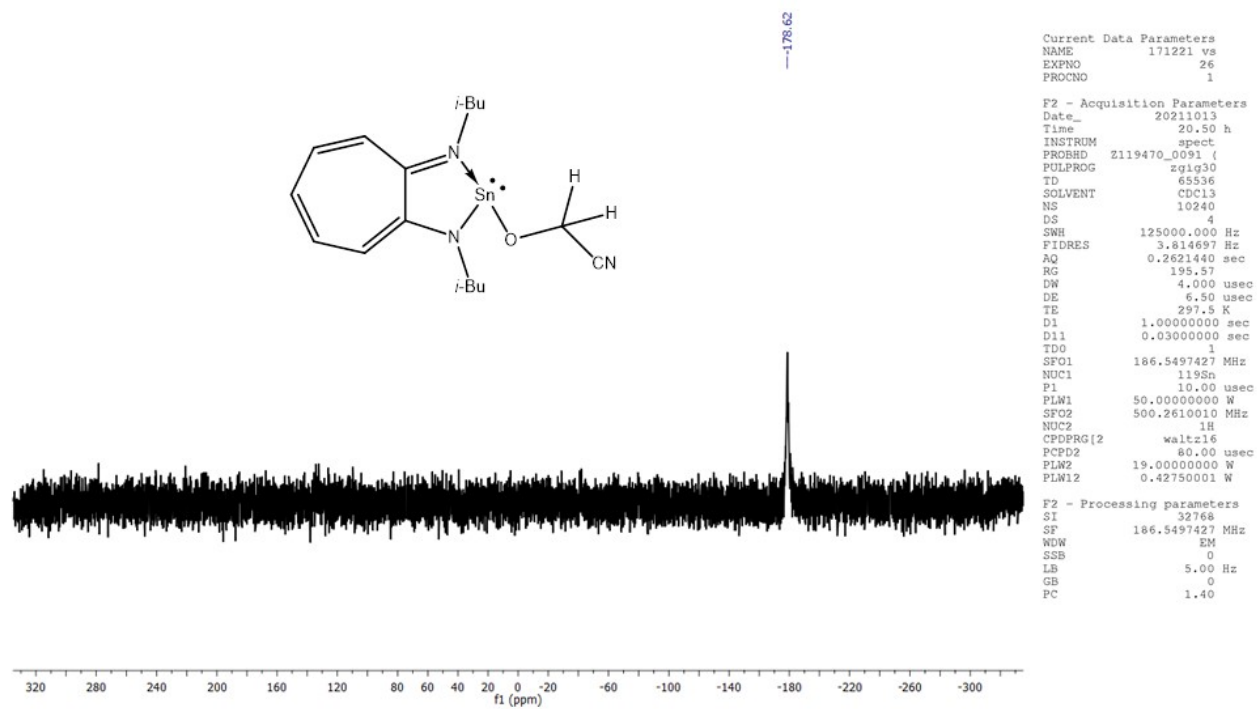

**Figure S166.**  $^{119}\text{Sn}$  NMR spectrum of compound **6**.

## IR spectrum of compound 5

*Agilent Resolutions Pro*

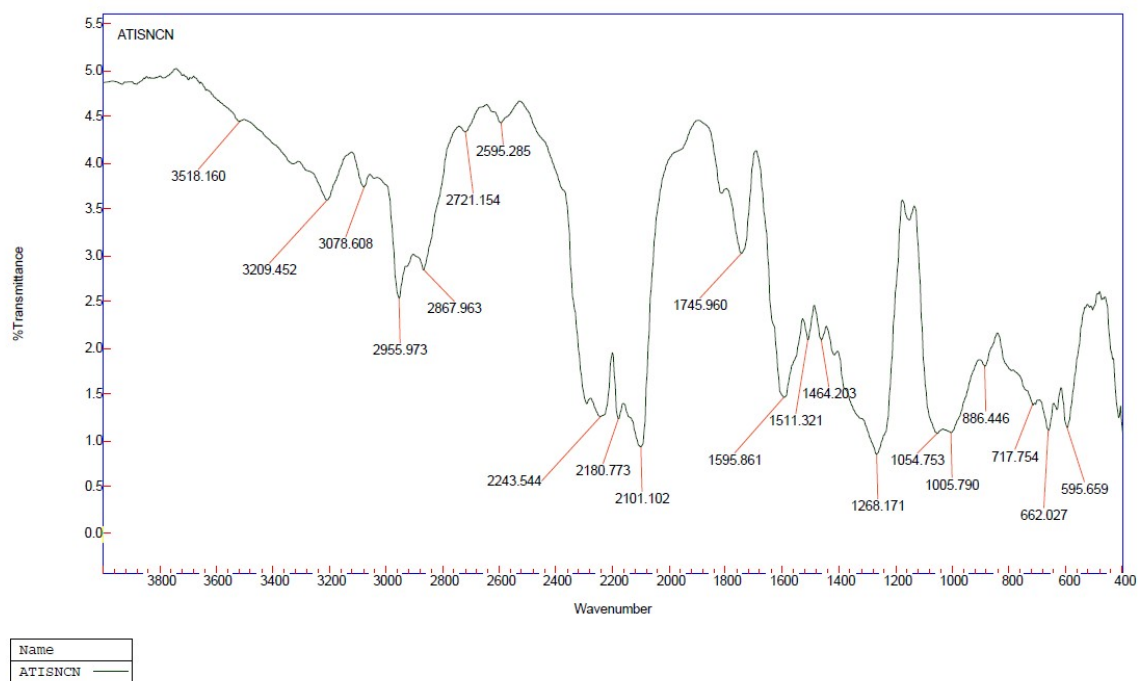

**Figure S177.** IR spectrum of compound 5.

**Table S1. Crystal data and structure refinement for compounds 2-4 and 6**

|                                          | <b>2</b>                                                                                                                                | <b>3</b>                                                                                                                                                  | <b>4</b>                                                                                                                                              | <b>6</b>                                                                                                                         |
|------------------------------------------|-----------------------------------------------------------------------------------------------------------------------------------------|-----------------------------------------------------------------------------------------------------------------------------------------------------------|-------------------------------------------------------------------------------------------------------------------------------------------------------|----------------------------------------------------------------------------------------------------------------------------------|
| Empirical formula                        | C <sub>15</sub> H <sub>23</sub> ClN <sub>2</sub> Sn                                                                                     | C <sub>21</sub> H <sub>41</sub> N <sub>3</sub> Si <sub>2</sub> Sn                                                                                         | C <sub>19</sub> H <sub>27</sub> N <sub>3</sub> Sn                                                                                                     | C <sub>17</sub> H <sub>25</sub> N <sub>3</sub> OSn                                                                               |
| Formula weight                           | 385.49                                                                                                                                  | 510.461                                                                                                                                                   | 416.16                                                                                                                                                | 812.22                                                                                                                           |
| Temperature, K                           | 273(2)                                                                                                                                  | 100(2)                                                                                                                                                    | 100(2)                                                                                                                                                | 298(2)                                                                                                                           |
| Wavelength, Å                            | 0.71073                                                                                                                                 | 0.71073                                                                                                                                                   | 0.71073                                                                                                                                               | 0.71073                                                                                                                          |
| Crystal system                           | Monoclinic                                                                                                                              | Triclinic                                                                                                                                                 | Triclinic                                                                                                                                             | Orthorhombic                                                                                                                     |
| Space group                              | <i>P2<sub>1</sub>/n</i>                                                                                                                 | <i>P</i> -1                                                                                                                                               | <i>P</i> -1                                                                                                                                           | <i>Pbca</i>                                                                                                                      |
| Unit cell dimensions                     | <i>a</i> = 11.035(2) Å<br><i>b</i> = 11.668(2) Å<br><i>c</i> = 13.378(2) Å<br><i>α</i> = 90°<br><i>β</i> = 98.890(6)°<br><i>γ</i> = 90° | <i>a</i> = 8.6894(4) Å<br><i>b</i> = 11.1113(5) Å<br><i>c</i> = 15.0434(7) Å<br><i>α</i> = 96.817(3)°<br><i>β</i> = 105.219(2)°<br><i>γ</i> = 107.753(2)° | <i>a</i> = 9.766(2) Å<br><i>b</i> = 10.098(2) Å<br><i>c</i> = 10.208(2) Å<br><i>α</i> = 97.537(7)°<br><i>β</i> = 106.002(7)°<br><i>γ</i> = 96.018(7)° | <i>a</i> = 7.1880(8) Å<br><i>b</i> = 18.634(2) Å<br><i>c</i> = 27.924(3) Å<br><i>α</i> = 90°<br><i>β</i> = 90°<br><i>γ</i> = 90° |
| Volume, Å <sup>3</sup>                   | 1701.8(5)                                                                                                                               | 1303.18(11)                                                                                                                                               | 948.8(3)                                                                                                                                              | 3740.2(7)                                                                                                                        |
| <i>Z</i>                                 | 4                                                                                                                                       | 2                                                                                                                                                         | 2                                                                                                                                                     | 4                                                                                                                                |
| Density (calculated), Mg/m <sup>3</sup>  | 1.505                                                                                                                                   | 1.301                                                                                                                                                     | 1.457                                                                                                                                                 | 1.442                                                                                                                            |
| Absorption coefficient, mm <sup>-1</sup> | 1.649                                                                                                                                   | 1.083                                                                                                                                                     | 1.350                                                                                                                                                 | 1.372                                                                                                                            |
| <i>F</i> (000)                           | 776.0                                                                                                                                   | 532.0                                                                                                                                                     | 422.9                                                                                                                                                 | 1648.0                                                                                                                           |
| Crystal size, mm <sup>3</sup>            | 0.32 × 0.21 × 0.12                                                                                                                      | 0.36 × 0.24 × 0.18                                                                                                                                        | 0.43 × 0.21 × 0.12                                                                                                                                    | 0.48 × 0.23 × 0.17                                                                                                               |

|                                                        |                                                                          |                                                                          |                                                                          |                                                                        |
|--------------------------------------------------------|--------------------------------------------------------------------------|--------------------------------------------------------------------------|--------------------------------------------------------------------------|------------------------------------------------------------------------|
| $\theta$ range for data collection, °                  | 4.46 to 56.772                                                           | 3.94 to 56.68                                                            | 4.22 to 56.72                                                            | 4.6 to 56.6                                                            |
| Limiting indices                                       | $-14 \leq h \leq 14$ ,<br>$-15 \leq k \leq 15$ ,<br>$-17 \leq l \leq 17$ | $-11 \leq h \leq 11$ ,<br>$-14 \leq k \leq 14$ ,<br>$-20 \leq l \leq 20$ | $-13 \leq h \leq 13$ ,<br>$-13 \leq k \leq 13$ ,<br>$-13 \leq l \leq 13$ | $-9 \leq h \leq 9$ ,<br>$-24 \leq k \leq 24$ ,<br>$-37 \leq l \leq 37$ |
| Reflections collected                                  | 29101                                                                    | 33549                                                                    | 26574                                                                    | 81165                                                                  |
| Independent reflections                                | 4256 [ $R_{\text{int}} = 0.0943$ , $R_{\text{sigma}} = 0.0776$ ]         | 6526 [ $R_{\text{int}} = 0.0387$ , $R_{\text{sigma}} = 0.0279$ ]         | 4707 [ $R_{\text{int}} = 0.0548$ , $R_{\text{sigma}} = 0.0357$ ]         | 4656 [ $R_{\text{int}} = 0.0586$ , $R_{\text{sigma}} = 0.0232$ ]       |
| Absorption correction                                  | Semi-empirical from equivalents                                          | Semi-empirical from equivalents                                          | Semi-empirical from equivalents                                          | Semi-empirical from equivalents                                        |
| Refinement method                                      | Full-matrix least-squares on $F^2$                                       | Full-matrix least-squares on $F^2$                                       | Full-matrix least-squares on $F^2$                                       | Full-matrix least-squares on $F^2$                                     |
| Data / restraints / parameters                         | 4256/0/176                                                               | 6526/0/254                                                               | 4707/0/212                                                               | 4656/0/203                                                             |
| Goodness-of-fit on $F^2$                               | 0.983                                                                    | 1.055                                                                    | 1.036                                                                    | 1.060                                                                  |
| Final $R$ indices [ $I > 2\sigma(I)$ ]                 | $R_1 = 0.0444$ ,<br>$wR_2 = 0.0637$                                      | $R_1 = 0.0257$ ,<br>$wR_2 = 0.0602$                                      | $R_1 = 0.0250$ ,<br>$wR_2 = 0.0703$                                      | $R_1 = 0.0311$ ,<br>$wR_2 = 0.0649$                                    |
| $R$ indices (all data)                                 | $R_1 = 0.1299$ ,<br>$wR_2 = 0.0795$                                      | $R_1 = 0.0304$ ,<br>$wR_2 = 0.0631$                                      | $R_1 = 0.0260$ ,<br>$wR_2 = 0.0717$                                      | $R_1 = 0.0558$ ,<br>$wR_2 = 0.0766$                                    |
| Largest diff. peak and hole, $\text{e}\text{\AA}^{-3}$ | 0.38 and -0.34                                                           | 0.70 and -0.68                                                           | 0.55 and -0.45                                                           | 1.23 and -0.90                                                         |

## General procedure for the cyanosilylation of aldehydes using compound 5 as a catalyst

Aldehyde (1 mmol), TMSCN (1.1 mmol), and [(*i*-Bu)<sub>2</sub>ATISnCN] (**5**) (0.1–2 mol%) were taken in a Schlenk flask. The reaction mixture was stirred at room temperature/50 °C for the required period (see table 2). The progress of the reaction was monitored by <sup>1</sup>H NMR spectroscopy; after the completion of the reaction, the cyanosilylated product was also characterized by <sup>13</sup>C NMR spectroscopic techniques.

### <sup>1</sup>H NMR spectra for the entries in Table 1

#### Entry 1

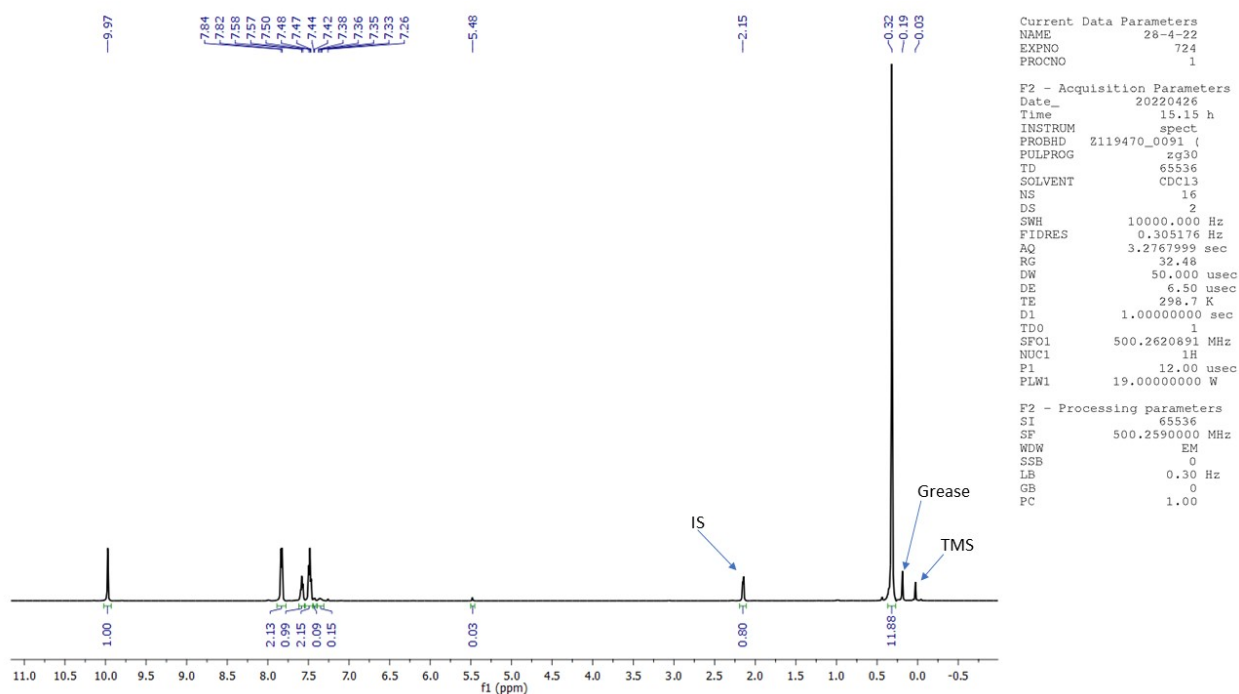

**Figure S18.** <sup>1</sup>H NMR spectrum for the cyanosilylation of C<sub>6</sub>H<sub>5</sub>CHO with TMSCN without a catalyst for 6 h at rt [IS (Internal standard) = hexamethyl benzene].

## Entry 2

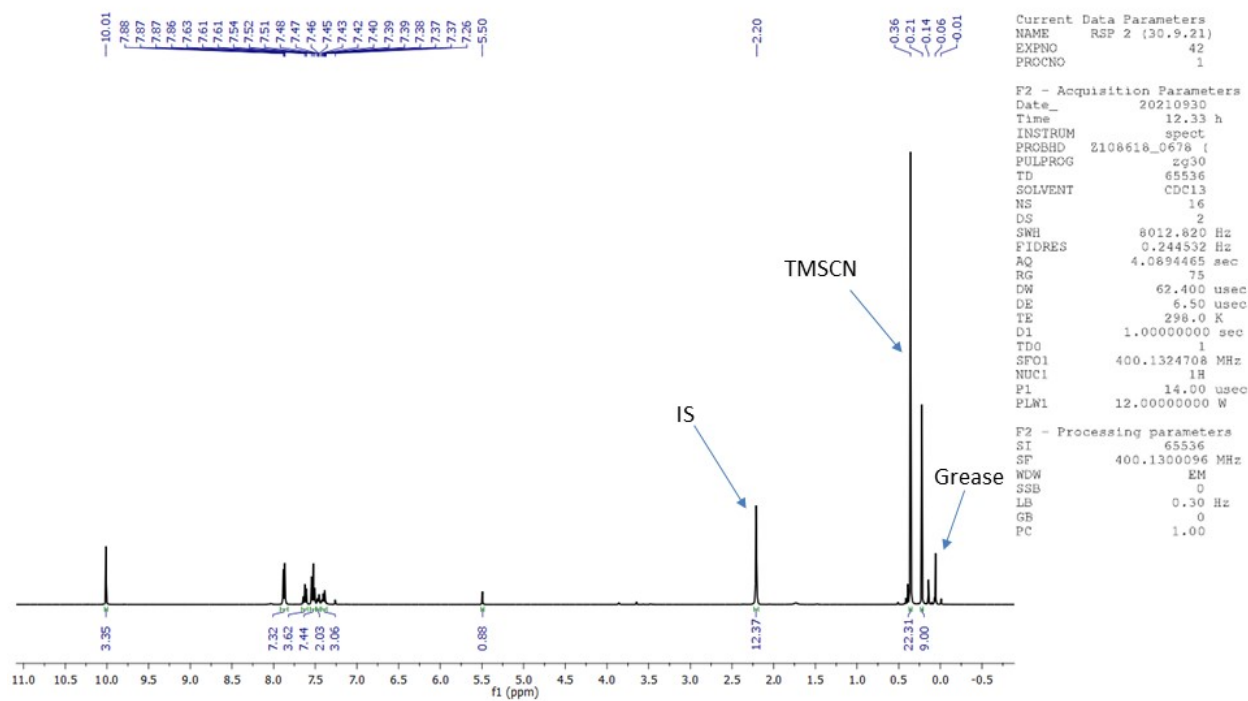

**Figure S19.**  $^1\text{H}$  NMR spectrum for the cyanosilylation of  $\text{C}_6\text{H}_5\text{CHO}$  with TMSCN without a catalyst for 4 h at  $50^\circ\text{C}$ .

## Entry 3

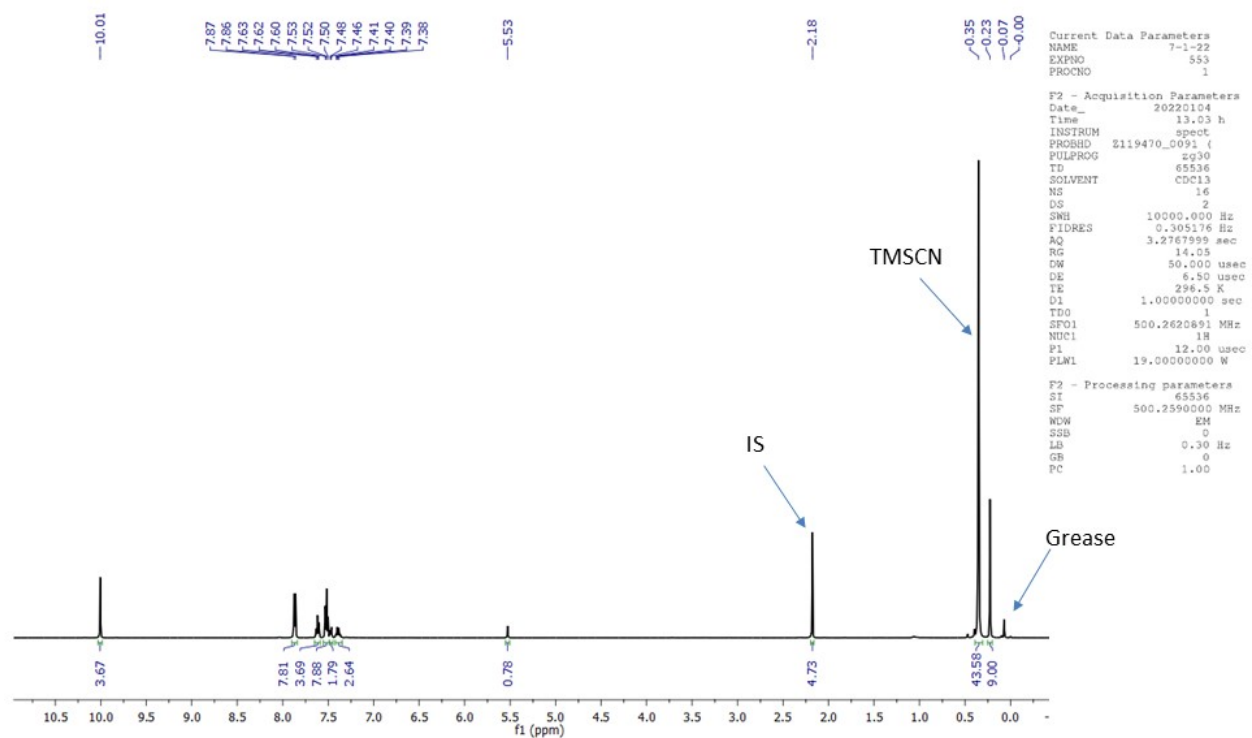

**Figure S20.**  $^1\text{H}$  NMR spectrum for the cyanosilylation of  $\text{C}_6\text{H}_5\text{CHO}$  with TMSCN using a catalyst (**5**) loading of 0.5 mol% for 0.33 h at rt.

## Entry 4

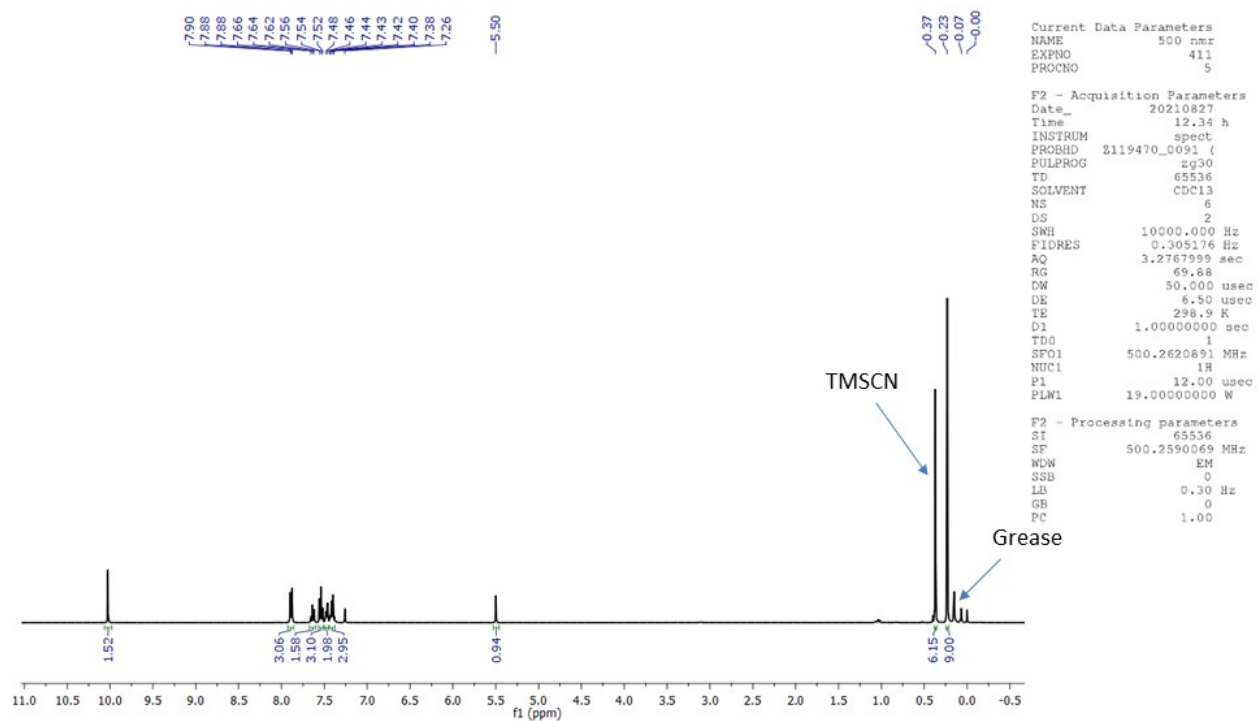

**Figure S21.**  $^1\text{H}$  NMR spectrum for the cyanosilylation of  $\text{C}_6\text{H}_5\text{CHO}$  with TMSCN using a catalyst (**5**) loading of 0.5 mol% for 1 h at rt.

## Entry 5

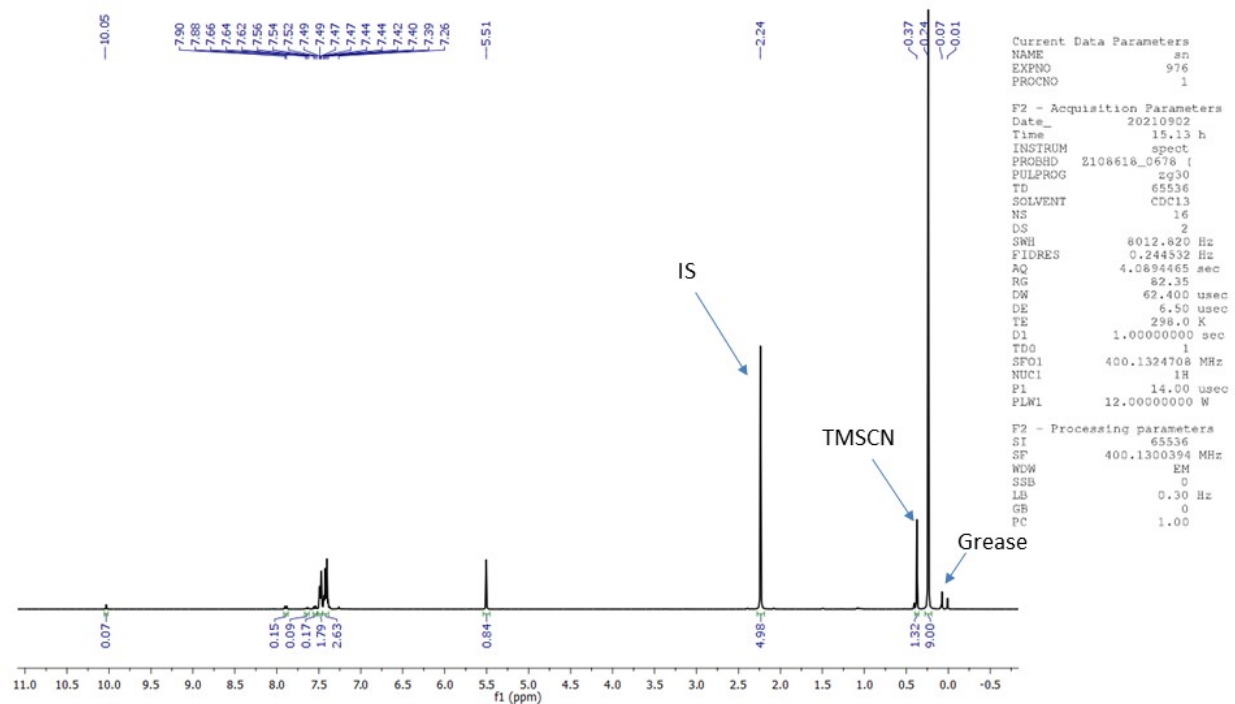

**Figure S22.**  $^1\text{H}$  NMR spectrum for the cyanosilylation of  $\text{C}_6\text{H}_5\text{CHO}$  with TMS-CN using a catalyst (5) loading of 2.0 mol% for 1 h at rt.

## Entry 6

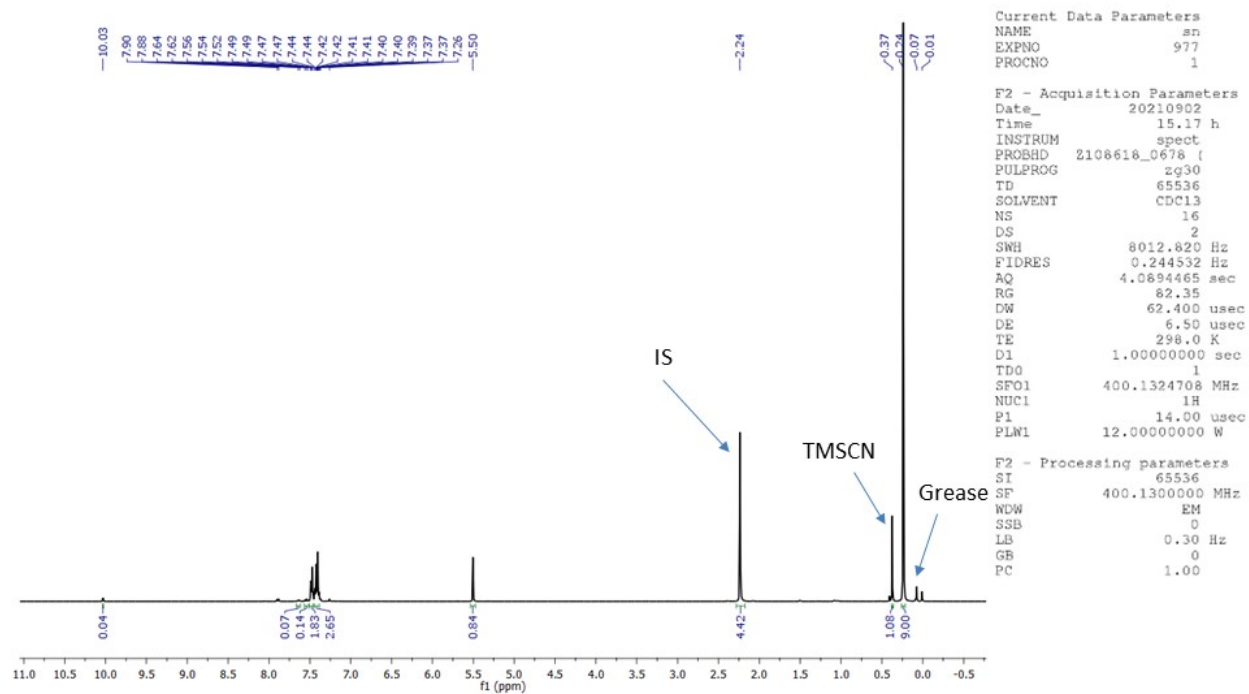

**Figure S23.**  $^1\text{H}$  NMR spectrum for the cyanosilylation of  $\text{C}_6\text{H}_5\text{CHO}$  with TMSiCN using a catalyst (5) loading of 2.0 mol% for 2 h at rt.

## Entry 7

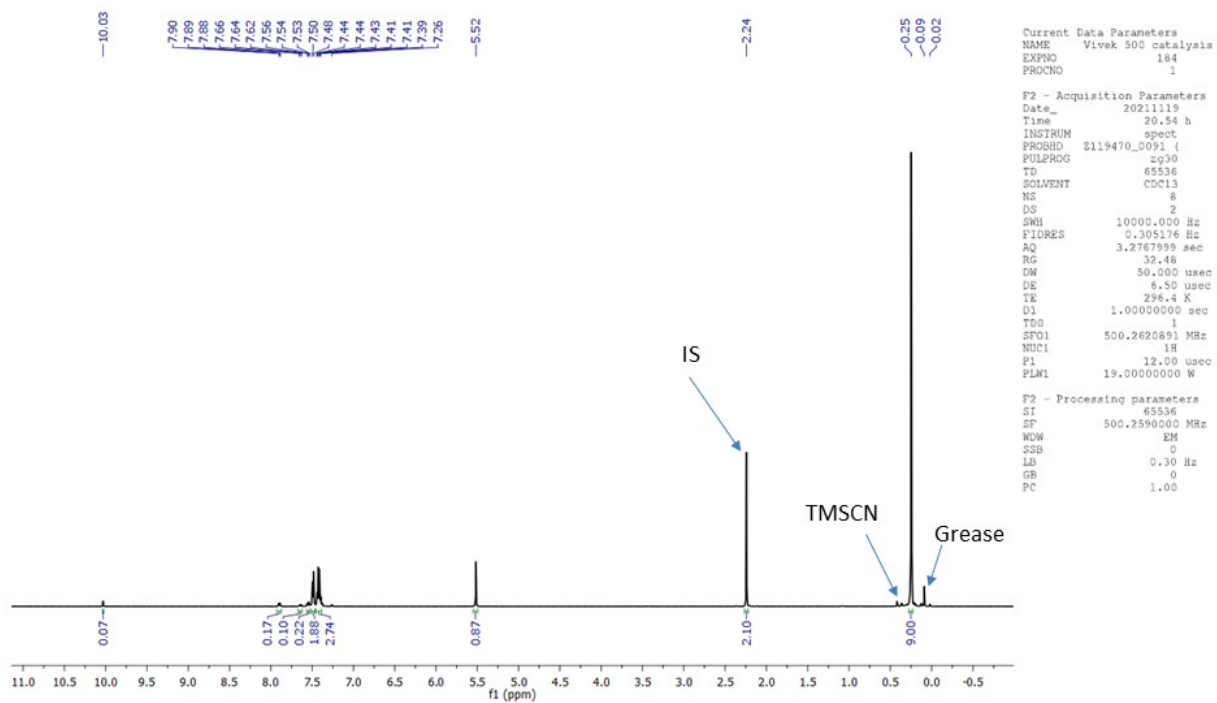

**Figure S24.**  $^1\text{H}$  NMR spectrum for the cyanosilylation of  $\text{C}_6\text{H}_5\text{CHO}$  with TMSCN using a catalyst (**5**) loading of 0.5 mol% for 0.25 h at 50  $^\circ\text{C}$ .

## Entry 8

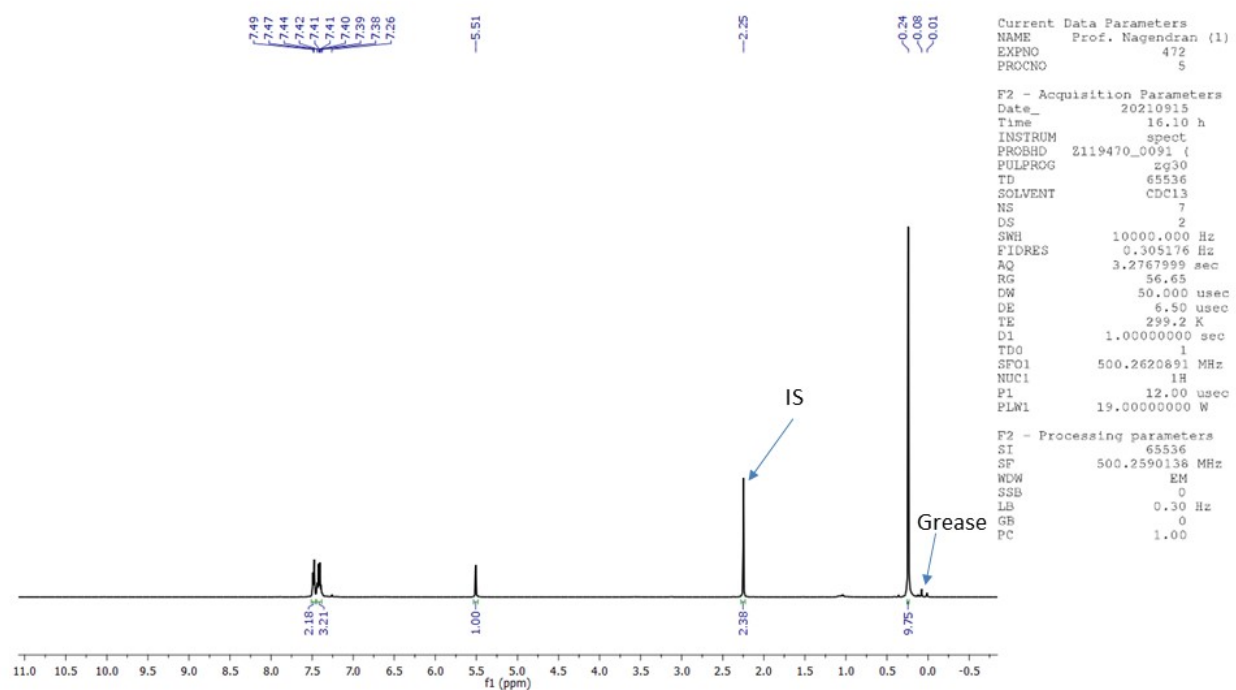

**Figure S25.**  $^1\text{H}$  NMR spectrum for the cyanosilylation of  $\text{C}_6\text{H}_5\text{CHO}$  with  $\text{TMSCN}$  using a catalyst (5) loading of 0.5 mol% for 0.33 h at 50  $^\circ\text{C}$ .

## Entry 9

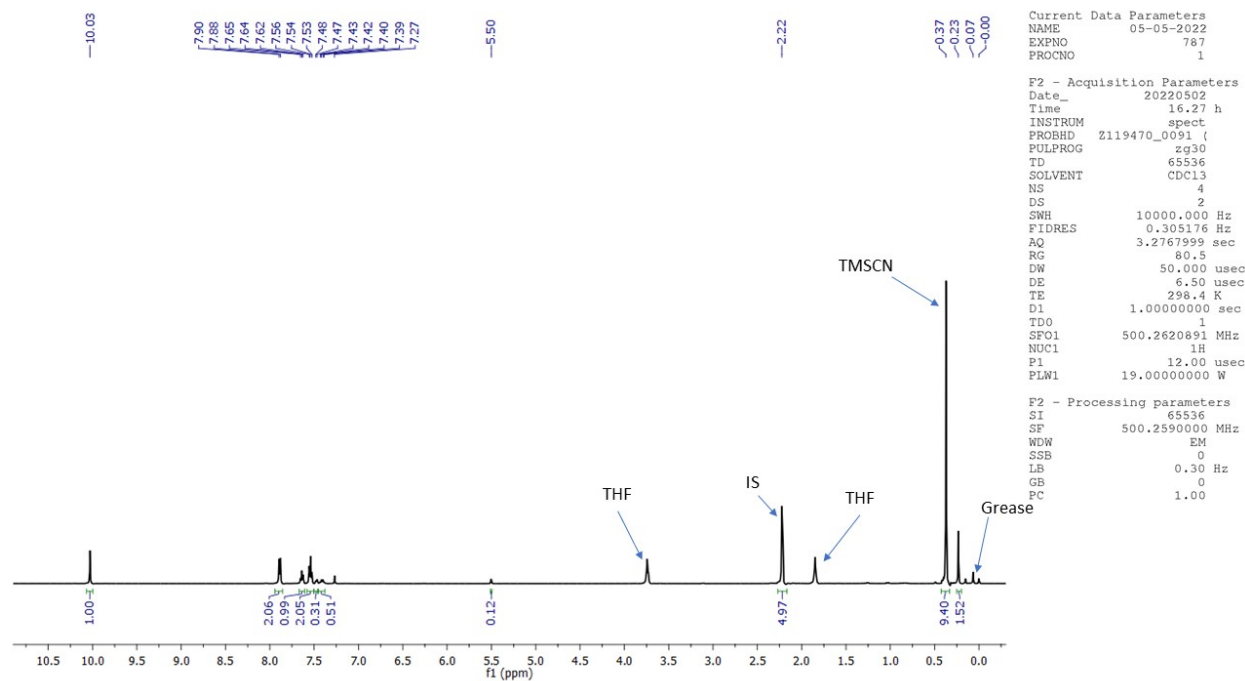

**Figure S26.**  $^1\text{H}$  NMR spectrum for the cyanosilylation of  $\text{C}_6\text{H}_5\text{CHO}$  with TMSiCN using a catalyst (ATiH) loading of 0.5 mol% for 0.33 h at rt.

## Entry 10

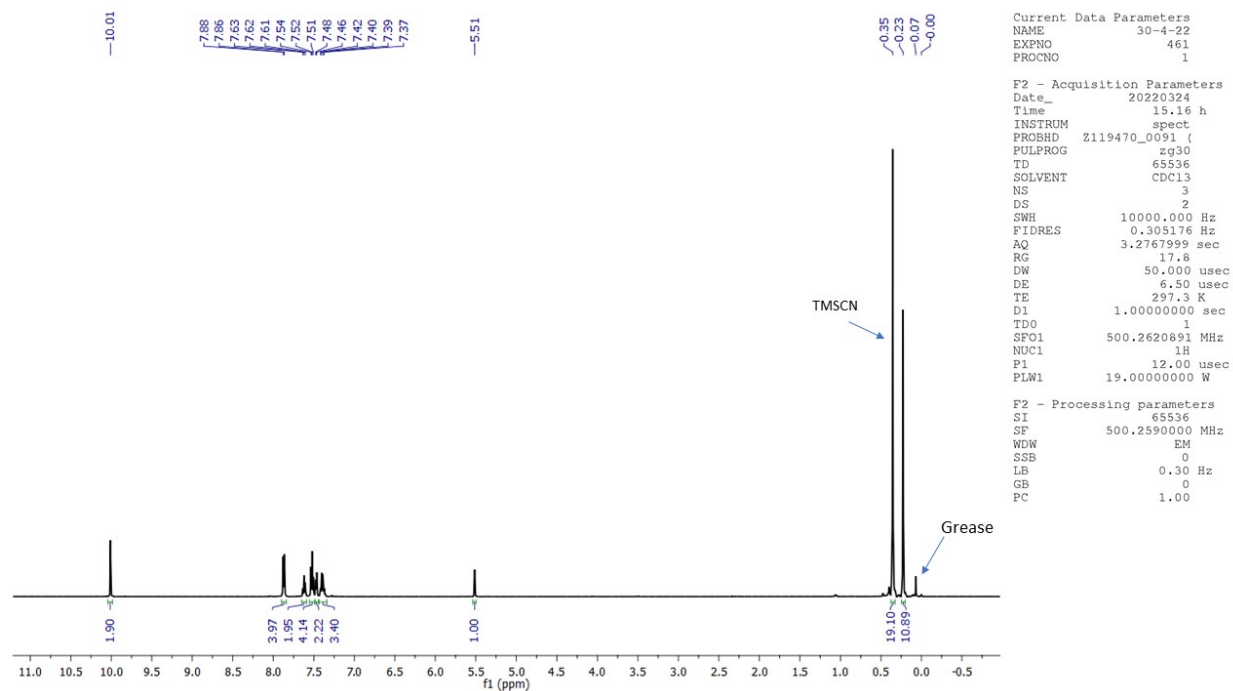

**Figure S27.**  $^1\text{H}$  NMR spectrum for the cyanosilylation of  $\text{C}_6\text{H}_5\text{CHO}$  with TMSCN using a catalyst (**2**) loading of 0.5 mol% for 0.33 h at rt.

## Entry 11

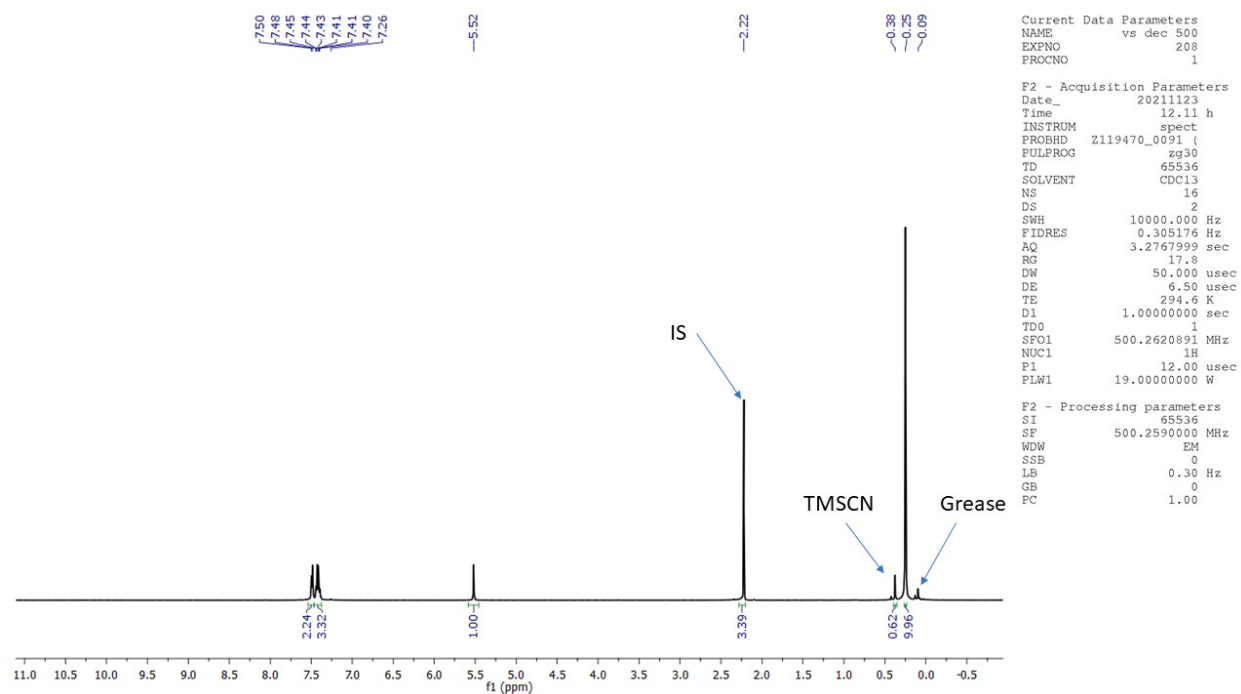

**Figure S28.**  $^1\text{H}$  NMR spectrum for the cyanosilylation of  $\text{C}_6\text{H}_5\text{CHO}$  with TMS-CN using a catalyst (**3**) loading of 0.5 mol% for 0.33 h at 50  $^\circ\text{C}$ .

## Entry 12

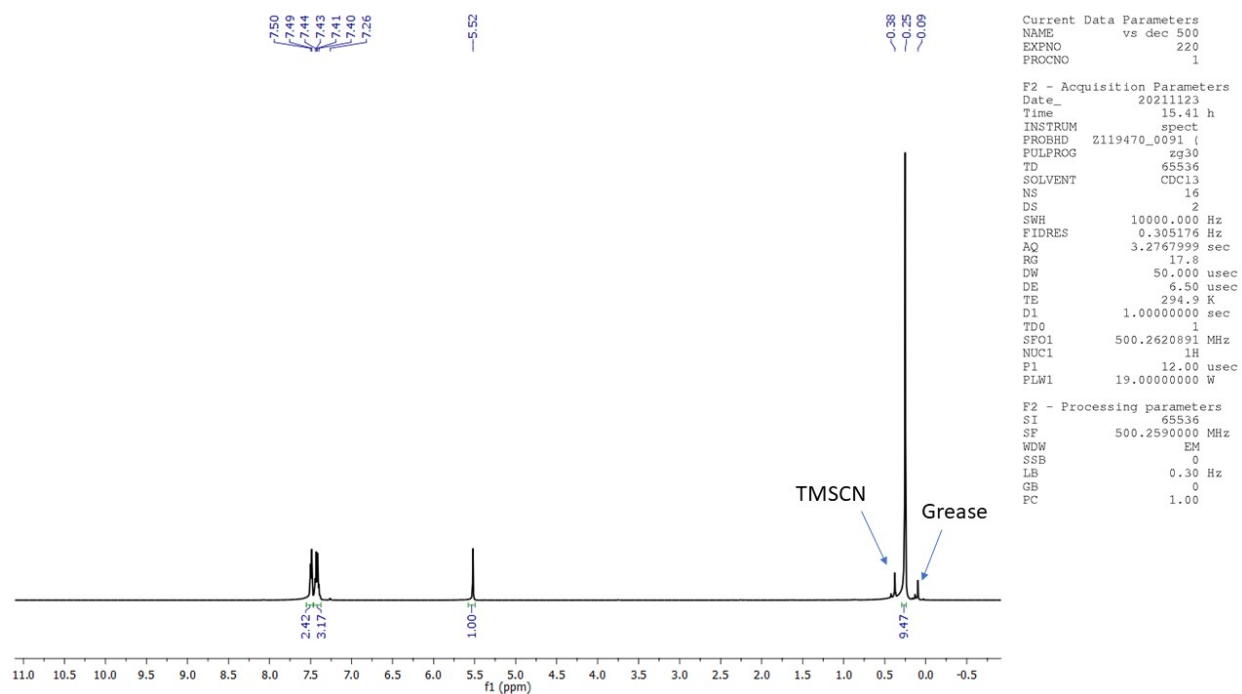

**Figure S29.**  $^1\text{H}$  NMR spectrum for the cyanosilylation of  $\text{C}_6\text{H}_5\text{CHO}$  with TMSiCN using a catalyst (**4**) loading of 0.5 mol% for 0.33 h at 50  $^\circ\text{C}$ .

## Entry 13

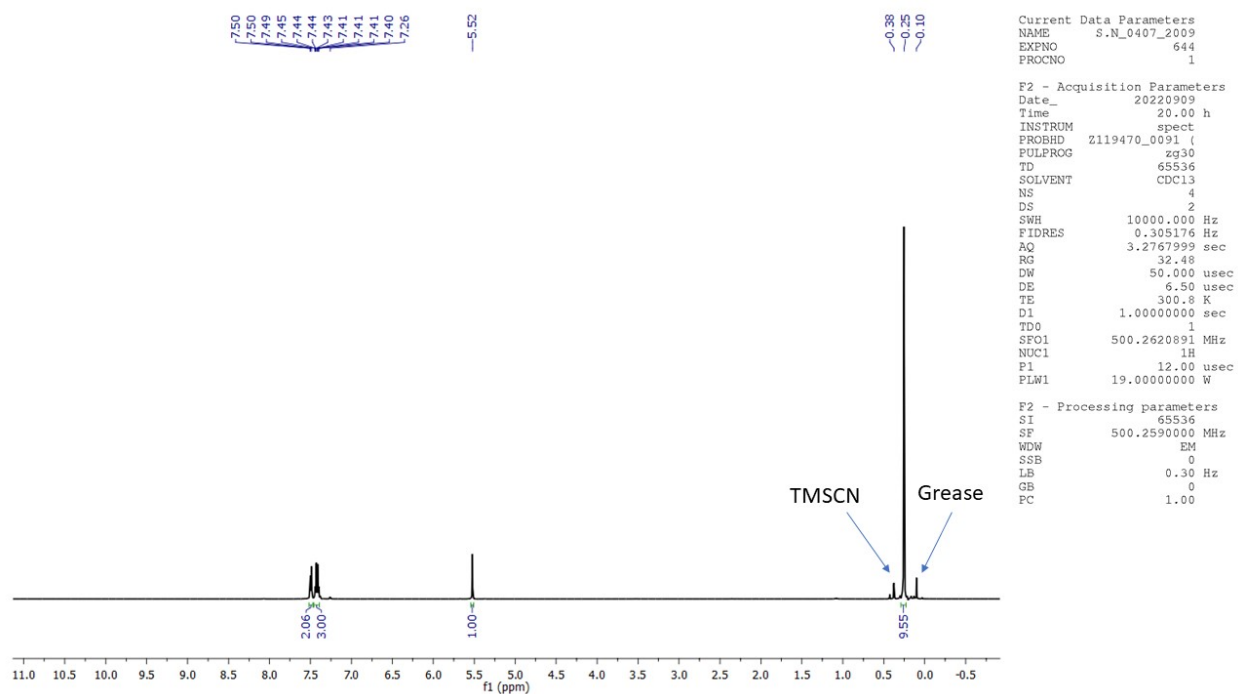

**Figure S30.**  $^1\text{H}$  NMR spectrum for the cyanosilylation of  $\text{C}_6\text{H}_5\text{CHO}$  with TMSCN using a catalyst (**5**) loading of 0.5 mol% for 0.33 h at 50  $^\circ\text{C}$ . This reaction was carried out on a large scale; benzaldehyde (5.0 mmol) and TMSCN (5.5 mmol).

## NMR data for the cyanosilylated products reported in Table 2

### Entry 1. $\text{CH}_2(\text{CN})(\text{OTMS})$ :

$^1\text{H}$  NMR (500 MHz,  $\text{CDCl}_3$ ):  $\delta$  0.21 (s, 9H,  $\text{Si}(\text{CH}_3)_3$ ), 2.24 (s,  $\text{C}_6(\text{CH}_3)_6$ ), 4.35 (s, 2H,  $\text{CH}_2\text{OSi}(\text{CH}_3)_3$ ) ppm;  $^{13}\text{C}\{^1\text{H}\}$  NMR (125 MHz,  $\text{CDCl}_3$ ):  $\delta$  -0.78 ( $\text{Si}(\text{CH}_3)_3$ ), 16.93  $\text{C}_6(\text{CH}_3)_6$ , 48.97 ( $\text{CH}_2\text{OSi}(\text{CH}_3)_3$ ), 117.65 (CN) 132.14  $\text{C}_6(\text{CH}_3)_6$  ppm.

### Entry 2. $\text{CH}_3(\text{CH}_2)_4(\text{CN})(\text{OTMS})$ :

$^1\text{H}$  NMR (500 MHz,  $\text{CDCl}_3$ ):  $\delta$  0.20 (s, 9H,  $\text{Si}(\text{CH}_3)_3$ ), 0.89 (t,  $^3J_{\text{HH}} = 7.0$  Hz, 3H,  $\text{CH}_2\text{CH}_3$ ), 1.31-1.35 (m, 4H,  $(\text{CH}_2)_2\text{CH}_3$ ), 1.42-1.48 (m, 2H,  $(\text{CH}_2)_2\text{CH}_2$ ), 1.75-1.79 (q,  $^3J_{\text{HH}} = 6.75$  Hz, 2H,  $\text{CH}_2\text{CH}_2$ ), 2.21 (s,  $\text{C}_6(\text{CH}_3)_6$ ), 4.38 (t,  $^3J_{\text{HH}} = 6.6$  Hz, 1H,  $\text{CHOSi}(\text{CH}_3)_3$ ) ppm;  $^{13}\text{C}\{^1\text{H}\}$  NMR (125 MHz,  $\text{CDCl}_3$ ):  $\delta$  -0.26 ( $\text{Si}(\text{CH}_3)_3$ ), 14.05 ( $\text{CH}_3$ ), 16.91  $\text{C}_6(\text{CH}_3)_6$ , 22.51 ( $\text{CH}_2$ ), 24.35 ( $\text{CH}_2$ ), 31.21 ( $\text{CH}_2$ ), 36.32 ( $\text{CH}_2$ ), 61.62 ( $\text{CHOSi}(\text{CH}_3)_3$ ), 120.28 (CN), 132.13  $\text{C}_6(\text{CH}_3)_6$  ppm.

### Entry 3. $\text{CH}_3(\text{CH}_2)_6(\text{CN})(\text{OTMS})$ :

$^1\text{H}$  NMR (500 MHz,  $\text{CDCl}_3$ ):  $\delta$  0.19 (s, 9H,  $\text{Si}(\text{CH}_3)_3$ ), 0.87 (t,  $^3J_{\text{HH}} = 7.0$  Hz, 3H,  $\text{CH}_2\text{CH}_3$ ), 1.26-1.30 (m, 8H,  $(\text{CH}_2)_4\text{CH}_3$ ), 1.40-1.44 (m, 2H,  $(\text{CH}_2)_2\text{CH}_2$ ), 1.74-1.78 (q,  $^3J_{\text{HH}} = 6.45$  Hz, 2H,  $\text{CH}_2\text{CH}_2$ ), 2.17 (s,  $\text{C}_6(\text{CH}_3)_6$ ), 4.37 (t,  $^3J_{\text{HH}} = 6.6$  Hz, 1H,  $\text{CHOSi}(\text{CH}_3)_3$ ) ppm;  $^{13}\text{C}\{^1\text{H}\}$  NMR (125 MHz,  $\text{CDCl}_3$ ):  $\delta$  -0.31 ( $\text{Si}(\text{CH}_3)_3$ ), 14.13 ( $\text{CH}_3$ ), 16.85  $\text{C}_6(\text{CH}_3)_6$ , 22.68 ( $\text{CH}_2$ ), 24.64 ( $\text{CH}_2$ ), 28.99 ( $\text{CH}_2$ ), 29.14 ( $\text{CH}_2$ ), 31.78 ( $\text{CH}_2$ ), 36.33 ( $\text{CH}_2$ ), 61.57 ( $\text{CHOSi}(\text{CH}_3)_3$ ), 120.21 (CN), 132.07  $\text{C}_6(\text{CH}_3)_6$  ppm.

### Entry 4. $\text{C}_6\text{H}_5\text{CH}_2\text{CH}_2\text{CH}(\text{CN})(\text{OTMS})$ :

$^1\text{H}$  NMR (500 MHz,  $\text{CDCl}_3$ ):  $\delta$  0.23 (s, 9H,  $\text{Si}(\text{CH}_3)_3$ ), 2.12-2.16 (m, 2H,  $\text{CH}_2$ ), 2.26 (s,  $\text{C}_6(\text{CH}_3)_6$ ), 2.82 (t,  $^3J_{\text{H,H}} = 7.8$  Hz, 2H,  $\text{CH}_2$ ), 4.39 (t,  $^3J_{\text{H,H}} = 6.55$  Hz, 1H,  $\text{CHOSi}(\text{CH}_3)_3$ ), 7.21-7.26 (m, 3H, Ar), 7.31-7.34 (m, 2H, Ar) ppm;  $^{13}\text{C}\{^1\text{H}\}$  NMR (125 MHz,  $\text{CDCl}_3$ ):  $\delta$  -0.36 ( $\text{Si}(\text{CH}_3)_3$ ), 16.88  $\text{C}_6(\text{CH}_3)_6$ , 30.71

(CH<sub>2</sub>), 37.72 (CH<sub>2</sub>), 60.71 (CHOSi(CH<sub>3</sub>)<sub>3</sub>), 119.97 (CN), 126.49 (C<sub>Ar</sub>), 128.48 (C<sub>Ar</sub>), 128.70 (C<sub>Ar</sub>), 132.10 C<sub>6</sub>(CH<sub>3</sub>)<sub>6</sub>, 140.04 (C<sub>Ar</sub>) ppm.

**Entry 5. C<sub>6</sub>H<sub>5</sub>CHCHCH(CN)(OTMS):**

<sup>1</sup>H NMR (500 MHz, CDCl<sub>3</sub>): δ 0.24 (s, 9H, Si(CH<sub>3</sub>)<sub>3</sub>), 2.19 (s, C<sub>6</sub>(CH<sub>3</sub>)<sub>6</sub>), 5.09 (d, <sup>3</sup>J<sub>H,H</sub> = 6.0 Hz, 1 H, CH), 6.14 (dd, <sup>3</sup>J<sub>H,H</sub> = 6.0 and 16.0 Hz, 1 H, CH), 6.77 (d, <sup>3</sup>J<sub>H,H</sub> = 16.0 Hz, 1 H, CH), 7.27-7.38 (m, 5H, Ar) ppm; <sup>13</sup>C{<sup>1</sup>H} NMR (125 MHz, CDCl<sub>3</sub>): δ = -0.07 (Si(CH<sub>3</sub>)<sub>3</sub>), 16.72, C<sub>6</sub>(CH<sub>3</sub>)<sub>6</sub>, 62.27, (CHOSi(CH<sub>3</sub>)<sub>3</sub>), 118.48 (CN), 123.62 (C<sub>Ar</sub>), 127.02 (C<sub>Ar</sub>), 128.80 (CH), 128.84 (C<sub>Ar</sub>), 132.00 C<sub>6</sub>(CH<sub>3</sub>)<sub>6</sub>, 133.97 (C<sub>Ar</sub>), 135.08 (CH), ppm.

**Entry 6. C<sub>6</sub>H<sub>5</sub>CH(CN)(OTMS):**

<sup>1</sup>H NMR (500 MHz, CDCl<sub>3</sub>): δ 0.25 (s, 9H, Si(CH<sub>3</sub>)<sub>3</sub>), 2.22 (s, C<sub>6</sub>(CH<sub>3</sub>)<sub>6</sub>), 5.52 (s, 1H, CHOSi(CH<sub>3</sub>)<sub>3</sub>), 7.38-7.50 (m, 5H, Ph) ppm; <sup>13</sup>C{<sup>1</sup>H} NMR (125 MHz, CDCl<sub>3</sub>): δ 0.18 (Si(CH<sub>3</sub>)<sub>3</sub>), 16.72, C<sub>6</sub>(CH<sub>3</sub>)<sub>6</sub>, 63.73 (CHOSi(CH<sub>3</sub>)<sub>3</sub>), 119.29 (CN), 126.44 (C<sub>Ar</sub>), 129.02 (C<sub>Ar</sub>), 129.42 (C<sub>Ar</sub>), 132.02 C<sub>6</sub>(CH<sub>3</sub>)<sub>6</sub>, 136.36 (C<sub>Ar</sub>).

**Entry 7. 4-FC<sub>6</sub>H<sub>4</sub>CH(CN)(OTMS):**

<sup>1</sup>H NMR (500 MHz, CDCl<sub>3</sub>): δ 0.23 (s, 9H, Si(CH<sub>3</sub>)<sub>3</sub>), 2.22 (s, C<sub>6</sub>(CH<sub>3</sub>)<sub>6</sub>), 5.49 (s, 1 H, CHOSi(CH<sub>3</sub>)<sub>3</sub>), 7.08-7.12 (m, 2 H, Ar), 7.45-7.47 (m, 2 H, Ar) ppm; <sup>13</sup>C{<sup>1</sup>H} NMR (125 MHz, CDCl<sub>3</sub>): δ -0.24 (Si(CH<sub>3</sub>)<sub>3</sub>), 16.84 C<sub>6</sub>(CH<sub>3</sub>)<sub>6</sub>, 63.06 (CHOSi(CH<sub>3</sub>)<sub>3</sub>), 115.94 (d, <sup>1</sup>J<sub>C-F</sub> = 20.0 Hz, *p*-CF), 119.12 (CN), 128.34 (d, <sup>2</sup>J<sub>C-F</sub> = 9.0 Hz, *m*-CH), 132.02 C<sub>6</sub>(CH<sub>3</sub>)<sub>6</sub>, 132.38 (d, <sup>2</sup>J<sub>C-F</sub> = 3.0 Hz, *m*-CH), 162.24 (C<sub>Ar</sub>), 164.22 (C<sub>Ar</sub>) ppm.

**Entry 8. 4-ClC<sub>6</sub>H<sub>4</sub>CH(CN)(OTMS):**

<sup>1</sup>H NMR (500 MHz, CDCl<sub>3</sub>): δ 0.24 (s, 9H, Si(CH<sub>3</sub>)<sub>3</sub>), 2.22 (s, C<sub>6</sub>(CH<sub>3</sub>)<sub>6</sub>), 5.47 (s, 1H, CHOSi(CH<sub>3</sub>)<sub>3</sub>), 7.38-7.42 (m, 4H, Ar) ppm; <sup>13</sup>C{<sup>1</sup>H} NMR (125 MHz, CDCl<sub>3</sub>): δ -0.15 (Si(CH<sub>3</sub>)<sub>3</sub>), 16.89 C<sub>6</sub>(CH<sub>3</sub>)<sub>6</sub>,

63.12 (CHOSi(CH<sub>3</sub>)<sub>3</sub>), 118.93 (CN), 127.82 (C<sub>Ar</sub>), 129.30 (C<sub>Ar</sub>), 132.08 C<sub>6</sub>(CH<sub>3</sub>)<sub>6</sub>, 134.99 (C<sub>Ar</sub>), 135.47 (C<sub>Ar</sub>) ppm.

**Entry 9. 4-BrC<sub>6</sub>H<sub>4</sub>CH(CN)(OTMS):**

<sup>1</sup>H NMR (500 MHz, CDCl<sub>3</sub>): δ 0.24 (s, 9H, Si(CH<sub>3</sub>)<sub>3</sub>), 2.21 (s, C<sub>6</sub>(CH<sub>3</sub>)<sub>6</sub>), 5.45 (s, 1H, CHOSi(CH<sub>3</sub>)<sub>3</sub>), 7.34 (d, <sup>3</sup>J<sub>H,H</sub> = 10.5 Hz, 2H, Ar), 7.54 (d, <sup>3</sup>J<sub>H,H</sub> = 10.5 Hz, 2H, Ar) ppm; <sup>13</sup>C{<sup>1</sup>H} NMR (125 MHz, CDCl<sub>3</sub>): δ -0.13 (Si(CH<sub>3</sub>)<sub>3</sub>), 16.86 C<sub>6</sub>(CH<sub>3</sub>)<sub>6</sub>, 63.17 (CHOSi(CH<sub>3</sub>)<sub>3</sub>), 118.85 (CN), 123.63 (C<sub>Ar</sub>), 128.08 (C<sub>Ar</sub>), 132.07 C<sub>6</sub>(CH<sub>3</sub>)<sub>6</sub>, 132.26 (C<sub>Ar</sub>), 135.50 (C<sub>Ar</sub>) ppm.

**Entry 10. 3-BrC<sub>6</sub>H<sub>4</sub>CH(CN)(OTMS):**

<sup>1</sup>H NMR (500 MHz, CDCl<sub>3</sub>): δ 0.26 (s, 9H, Si(CH<sub>3</sub>)<sub>3</sub>), 2.21 (s, C<sub>6</sub>(CH<sub>3</sub>)<sub>6</sub>), 5.46 (s, 1H, CHOSi(CH<sub>3</sub>)<sub>3</sub>), 7.29 (t, <sup>3</sup>J<sub>H,H</sub> = 9.8 Hz, 1H, Ar), 7.39 (d, <sup>3</sup>J<sub>H,H</sub> = 9.6 Hz, 1H, Ar), 7.52 (d, <sup>3</sup>J<sub>H,H</sub> = 9.8 Hz, 1H, Ar), 7.63 (s, 1H, Ar) ppm; <sup>13</sup>C{<sup>1</sup>H} NMR (125 MHz, CDCl<sub>3</sub>): δ -0.16 (Si(CH<sub>3</sub>)<sub>3</sub>), 17.08 C<sub>6</sub>(CH<sub>3</sub>)<sub>6</sub>, 62.96 (CHOSi(CH<sub>3</sub>)<sub>3</sub>), 118.82 (CN), 123.10 (C<sub>Ar</sub>), 124.97 (C<sub>Ar</sub>), 129.49 (C<sub>Ar</sub>), 130.63 (C<sub>Ar</sub>), 132.16 C<sub>6</sub>(CH<sub>3</sub>)<sub>6</sub>, 132.58 (C<sub>Ar</sub>), 138.47 (C<sub>Ar</sub>) ppm.

**Entry 11. 4-CNC<sub>6</sub>H<sub>4</sub>CH(CN)(OTMS):**

<sup>1</sup>H NMR (500 MHz, CDCl<sub>3</sub>): δ 0.24 (s, 9H, Si(CH<sub>3</sub>)<sub>3</sub>), 2.19 (s, C<sub>6</sub>(CH<sub>3</sub>)<sub>6</sub>), 5.56 (s, 1H, CHOSi(CH<sub>3</sub>)<sub>3</sub>), 7.58-7.71 (m, 4H, Ar) ppm; <sup>13</sup>C{<sup>1</sup>H} NMR (125 MHz, CDCl<sub>3</sub>): δ -0.35 (Si(CH<sub>3</sub>)<sub>3</sub>), 16.88 C<sub>6</sub>(CH<sub>3</sub>)<sub>6</sub>, 62.64 (CHOSi(CH<sub>3</sub>)<sub>3</sub>), 113.34 (C<sub>Ar</sub>), 118.14 (CN), 118.32 (CN), 126.90 (C<sub>Ar</sub>), 131.99 C<sub>6</sub>(CH<sub>3</sub>)<sub>6</sub>, 132.88 (C<sub>Ar</sub>), 141.20 (C<sub>Ar</sub>) ppm.

**Entry 12. 4-NO<sub>2</sub>C<sub>6</sub>H<sub>4</sub>CH(CN)(OTMS):**

<sup>1</sup>H NMR (500 MHz, CDCl<sub>3</sub>): δ 0.28 (s, 9H, Si(CH<sub>3</sub>)<sub>3</sub>), 2.22 (s, C<sub>6</sub>(CH<sub>3</sub>)<sub>6</sub>), 5.60 (s, 1H, CHOSi(CH<sub>3</sub>)<sub>3</sub>), 7.66 (d, <sup>3</sup>J<sub>H,H</sub> = 8.6 Hz, 2H, Ar), 8.27 (d, <sup>3</sup>J<sub>H,H</sub> = 8.8 Hz, 2H, Ar) ppm; <sup>13</sup>C{<sup>1</sup>H} NMR (125 MHz, CDCl<sub>3</sub>):

$\delta$  -0.21 (Si(CH<sub>3</sub>)<sub>3</sub>), 16.90 C<sub>6</sub>(CH<sub>3</sub>)<sub>6</sub>, 62.76 (CHOSi(CH<sub>3</sub>)<sub>3</sub>), 118.27 (CN), 124.31 (C<sub>Ar</sub>), 127.24 (C<sub>Ar</sub>), 132.12 C<sub>6</sub>(CH<sub>3</sub>)<sub>6</sub>, 143.01 (C<sub>Ar</sub>), 148.57 (C<sub>Ar</sub>) ppm.

**Entry 13. 3-NO<sub>2</sub>C<sub>6</sub>H<sub>4</sub>CH(CN)(OTMS):**

<sup>1</sup>H NMR (500 MHz, CDCl<sub>3</sub>):  $\delta$  0.28 (s, 9H, Si(CH<sub>3</sub>)<sub>3</sub>), 2.20 (s, C<sub>6</sub>(CH<sub>3</sub>)<sub>6</sub>), 5.61 (s, 1H, CHOSi(CH<sub>3</sub>)<sub>3</sub>), 7.63 (t, <sup>3</sup>J<sub>H,H</sub> = 8.0 Hz, 1H, Ar), 7.82 (d, <sup>3</sup>J<sub>H,H</sub> = 7.6 Hz, 1H, Ar), 8.24 (d, <sup>3</sup>J<sub>H,H</sub> = 8.1 Hz, 1H, Ar), 8.34 (s, 1H, Ar) ppm; <sup>13</sup>C{<sup>1</sup>H} NMR (125 MHz, CDCl<sub>3</sub>):  $\delta$  -0.36 (Si(CH<sub>3</sub>)<sub>3</sub>), 16.91 C<sub>6</sub>(CH<sub>3</sub>)<sub>6</sub>, 62.62 (CHOSi(CH<sub>3</sub>)<sub>3</sub>), 118.39 (CN), 121.37 (C<sub>Ar</sub>), 124.33 (C<sub>Ar</sub>), 130.23 (C<sub>Ar</sub>), 132.06 C<sub>6</sub>(CH<sub>3</sub>)<sub>6</sub>, 132.16 (C<sub>Ar</sub>), 138.53 (C<sub>Ar</sub>), 148.58 (C<sub>Ar</sub>) ppm.

**Entry 14. 2-NO<sub>2</sub>C<sub>6</sub>H<sub>4</sub>CH(CN)(OTMS):**

<sup>1</sup>H NMR (500 MHz, CDCl<sub>3</sub>):  $\delta$  0.27 (s, 9H, Si(CH<sub>3</sub>)<sub>3</sub>), 2.19 (s, C<sub>6</sub>(CH<sub>3</sub>)<sub>6</sub>), 6.21 (s, 1H, CHOSi(CH<sub>3</sub>)<sub>3</sub>), 7.59 (t, <sup>3</sup>J<sub>H,H</sub> = 8.0 Hz, 1H, Ar), 7.77 (t, <sup>3</sup>J<sub>H,H</sub> = 7.4 Hz, 1H, Ar), 8.01 (d, <sup>3</sup>J<sub>H,H</sub> = 7.9 Hz, 1H, Ar), 8.14 (d, <sup>3</sup>J<sub>H,H</sub> = 8.2 Hz, 1H, Ar) ppm; <sup>13</sup>C{<sup>1</sup>H} NMR (125 MHz, CDCl<sub>3</sub>):  $\delta$  -0.36 (Si(CH<sub>3</sub>)<sub>3</sub>), 16.80 C<sub>6</sub>(CH<sub>3</sub>)<sub>6</sub>, 60.27 (CHOSi(CH<sub>3</sub>)<sub>3</sub>), 117.99 (CN), 125.42 (C<sub>Ar</sub>), 128.60 (C<sub>Ar</sub>), 130.40 (C<sub>Ar</sub>), 132.01 C<sub>6</sub>(CH<sub>3</sub>)<sub>6</sub>, 132.22 (C<sub>Ar</sub>), 134.60 (C<sub>Ar</sub>), 146.47 (C<sub>Ar</sub>) ppm.

**Entry 15. 2,6-Cl<sub>2</sub>C<sub>6</sub>H<sub>4</sub>CH(CN)(OTMS):**

<sup>1</sup>H NMR (500 MHz, CDCl<sub>3</sub>):  $\delta$  0.21 (s, 9H, Si(CH<sub>3</sub>)<sub>3</sub>), 2.25 (s, C<sub>6</sub>(CH<sub>3</sub>)<sub>6</sub>), 6.28 (s, 1H, CHOSi(CH<sub>3</sub>)<sub>3</sub>), 7.28-7.38 (m, 3H Ar) ppm; <sup>13</sup>C{<sup>1</sup>H} NMR (125 MHz, CDCl<sub>3</sub>):  $\delta$  -0.19 (Si(CH<sub>3</sub>)<sub>3</sub>), 16.85 C<sub>6</sub>(CH<sub>3</sub>)<sub>6</sub>, 59.61 (CHOSi(CH<sub>3</sub>)<sub>3</sub>), 117.66 (CN), 129.50 (C<sub>Ar</sub>), 131.32 (C<sub>Ar</sub>), 131.50 (C<sub>Ar</sub>), 132.18 C<sub>6</sub>(CH<sub>3</sub>)<sub>6</sub>, 135.64 (C<sub>Ar</sub>) ppm.

**Entry 16. 2,5-(CH<sub>3</sub>O)<sub>2</sub>C<sub>6</sub>H<sub>4</sub>CH(CN)(OTMS):**

<sup>1</sup>H NMR (500 MHz, CDCl<sub>3</sub>):  $\delta$  0.23 (s, 9H, Si(CH<sub>3</sub>)<sub>3</sub>), 2.20 (s, C<sub>6</sub>(CH<sub>3</sub>)<sub>6</sub>), 3.79 (s, 3H, OCH<sub>3</sub>), 3.83 (s, 3H, OCH<sub>3</sub>), 5.77 (s, 1H, CHOSi(CH<sub>3</sub>)<sub>3</sub>), 6.82-6.87 (m, 2H, Ar), 7.16 (s, 1H, Ar) ppm; <sup>13</sup>C{<sup>1</sup>H} NMR (125

MHz, CDCl<sub>3</sub>):  $\delta$  -0.25 (Si(CH<sub>3</sub>)<sub>3</sub>), 16.81 C<sub>6</sub>(CH<sub>3</sub>)<sub>6</sub>, 55.89 (OCH<sub>3</sub>), 56.03 (OCH<sub>3</sub>), 58.27 (CHOSi(CH<sub>3</sub>)<sub>3</sub>), 111.84 (C<sub>Ar</sub>), 113.21 (C<sub>Ar</sub>), 115.21 (C<sub>Ar</sub>), 119.34 (CN), 125.64 (C<sub>Ar</sub>), 132.02 C<sub>6</sub>(CH<sub>3</sub>)<sub>6</sub>, 150.02 (C<sub>Ar</sub>), 153.95 (C<sub>Ar</sub>) ppm.

**Entry 17. 4-OCH<sub>3</sub>C<sub>6</sub>H<sub>4</sub>CH(CN)(OTMS):**

<sup>1</sup>H NMR (500 MHz, CDCl<sub>3</sub>):  $\delta$  0.21 (s, 9H, Si(CH<sub>3</sub>)<sub>3</sub>), 2.22 (s, C<sub>6</sub>(CH<sub>3</sub>)<sub>6</sub>), 3.81 (s, 3H, OCH<sub>3</sub>), 5.43 (s, 1H, CHOSi(CH<sub>3</sub>)<sub>3</sub>), 6.91-6.93 (m, 2H, Ar), 7.37-7.39 (m, 2H, Ar) ppm; <sup>13</sup>C{<sup>1</sup>H} NMR (125 MHz, CDCl<sub>3</sub>):  $\delta$  -0.08 (Si(CH<sub>3</sub>)<sub>3</sub>), 16.91 C<sub>6</sub>(CH<sub>3</sub>)<sub>6</sub>, 55.49 (OCH<sub>3</sub>), 63.52 (CHOSi(CH<sub>3</sub>)<sub>3</sub>), 114.45 (C<sub>Ar</sub>), 119.46 (CN), 128.08 (C<sub>Ar</sub>), 128.66 (C<sub>Ar</sub>), 132.13 C<sub>6</sub>(CH<sub>3</sub>)<sub>6</sub>, 160.53 (C<sub>Ar</sub>) ppm.

**Entry 18. 4-CH<sub>3</sub>C<sub>6</sub>H<sub>4</sub>CH(CN)(OTMS):**

<sup>1</sup>H NMR (500 MHz, CDCl<sub>3</sub>):  $\delta$  0.23 (s, 9H, Si(CH<sub>3</sub>)<sub>3</sub>), 2.22 (s, C<sub>6</sub>(CH<sub>3</sub>)<sub>6</sub>), 2.38 (s, 3H, CH<sub>3</sub>), 5.47 (s, 1H, CHOSi(CH<sub>3</sub>)<sub>3</sub>), 7.22 (d, <sup>3</sup>J<sub>H,H</sub> = 7.7 Hz, 2H, Ar), 7.35 (d, <sup>3</sup>J<sub>H,H</sub> = 7.8 Hz, 2H, Ar) ppm; <sup>13</sup>C{<sup>1</sup>H} NMR (125 MHz, CDCl<sub>3</sub>):  $\delta$  -0.18 (Si(CH<sub>3</sub>)<sub>3</sub>), 16.87 C<sub>6</sub>(CH<sub>3</sub>)<sub>6</sub>, 21.32 (CH<sub>3</sub>), 63.57 (CHOSi(CH<sub>3</sub>)<sub>3</sub>), 119.43 (CN), 126.52 (C<sub>Ar</sub>), 129.72 (C<sub>Ar</sub>), 132.10 C<sub>6</sub>(CH<sub>3</sub>)<sub>6</sub>, 133.56 (C<sub>Ar</sub>), 139.49 (C<sub>Ar</sub>) ppm.

**Entry 19. 4-C<sub>5</sub>H<sub>4</sub>NCH(CN)(OTMS):**

<sup>1</sup>H NMR (500 MHz, CDCl<sub>3</sub>):  $\delta$  0.21 (s, 9H, Si(CH<sub>3</sub>)<sub>3</sub>), 2.15 (s, C<sub>6</sub>(CH<sub>3</sub>)<sub>6</sub>), 5.48 (s, 1H, CHOSi(CH<sub>3</sub>)<sub>3</sub>), 7.34 (d, <sup>3</sup>J<sub>H,H</sub> = 6.0 Hz, 2H, CH<sub>pyridine</sub>), 8.60 (d, <sup>3</sup>J<sub>H,H</sub> = 6.0 Hz, 2H, CH<sub>pyridine</sub>) ppm; <sup>13</sup>C{<sup>1</sup>H} NMR (125 MHz, CDCl<sub>3</sub>):  $\delta$  -0.41 (Si(CH<sub>3</sub>)<sub>3</sub>), 16.72 C<sub>6</sub>(CH<sub>3</sub>)<sub>6</sub>, 62.23 (CHOSi(CH<sub>3</sub>)<sub>3</sub>), 118.08 (CN), 120.55 (CH<sub>pyridine</sub>), 131.93 C<sub>6</sub>(CH<sub>3</sub>)<sub>6</sub>, 144.88 (C<sub>pyridine</sub>), 150.38 (CH<sub>pyridine</sub>) ppm.

**Entry 20. 2-C<sub>5</sub>H<sub>4</sub>NCH(CN)(OTMS):**

<sup>1</sup>H NMR (500 MHz, CDCl<sub>3</sub>):  $\delta$  0.22 (s, 9H, Si(CH<sub>3</sub>)<sub>3</sub>), 2.18 (s, C<sub>6</sub>(CH<sub>3</sub>)<sub>6</sub>), 5.56 (s, 1H, CHOSi(CH<sub>3</sub>)<sub>3</sub>), 7.26-7.28 (m, 1H, CH<sub>pyridine</sub>), 7.54-7.57 (m, 1H, CH<sub>pyridine</sub>), 7.73-7.76 (m, 1H, CH<sub>pyridine</sub>), 8.54-8.55 (m, 1H, CH<sub>pyridine</sub>) ppm; <sup>13</sup>C{<sup>1</sup>H} NMR (125 MHz, CDCl<sub>3</sub>):  $\delta$  -0.35 (Si(CH<sub>3</sub>)<sub>3</sub>), 16.75 C<sub>6</sub>(CH<sub>3</sub>)<sub>6</sub>, 65.10

(CHOSi(CH<sub>3</sub>)<sub>3</sub>), 118.72 (CN), 120.47 (CH<sub>pyridine</sub>), 124.01 (CH<sub>pyridine</sub>), 131.96 C<sub>6</sub>(CH<sub>3</sub>)<sub>6</sub>), 137.51 (CH<sub>pyridine</sub>), 149.38 (CH<sub>pyridine</sub>), 155.42 (C<sub>pyridine</sub>) ppm.

**Entry 21. 2-C<sub>4</sub>H<sub>4</sub>NCH(CN)(OTMS):**

<sup>1</sup>H NMR (500 MHz, CDCl<sub>3</sub>): δ 0.19 (s, 9H, Si(CH<sub>3</sub>)<sub>3</sub>), 2.26 (s, C<sub>6</sub>(CH<sub>3</sub>)<sub>6</sub>), 5.58 (s, 1H, CHOSi(CH<sub>3</sub>)<sub>3</sub>), 6.18 (br, 1H, CH<sub>pyrrole</sub>), 6.29 (br, 1H, CH<sub>pyrrole</sub>), 6.84 (br, 1H, CH<sub>pyrrole</sub>), 8.66 (bs, 1H, NH<sub>pyrrole</sub>) ppm; <sup>13</sup>C{<sup>1</sup>H} NMR (125 MHz, CDCl<sub>3</sub>): δ -0.31 (Si(CH<sub>3</sub>)<sub>3</sub>), 16.85 C<sub>6</sub>(CH<sub>3</sub>)<sub>6</sub>), 57.86 (CHOSi(CH<sub>3</sub>)<sub>3</sub>), 108.49 (CH<sub>pyrrole</sub>), 108.84 (CH<sub>pyrrole</sub>), 118.47 (CN), 120.04 (CH<sub>pyrrole</sub>), 125.52 (C<sub>pyrrole</sub>), 132.07 C<sub>6</sub>(CH<sub>3</sub>)<sub>6</sub>) ppm.

**Entry 22. CH<sub>3</sub>CONHC<sub>6</sub>H<sub>4</sub>CH(CN)(OTMS):**

<sup>1</sup>H NMR (500 MHz, CDCl<sub>3</sub>): δ 0.21 (s, 9H, Si(CH<sub>3</sub>)<sub>3</sub>), 2.16 (s, 3H, NHCOCH<sub>3</sub>), 2.24 (s, C<sub>6</sub>(CH<sub>3</sub>)<sub>6</sub>), 5.45 (s, 1H, CHOSi(CH<sub>3</sub>)<sub>3</sub>), 7.38 (d, <sup>3</sup>J<sub>H,H</sub> = 8.4 Hz, 2H, Ar), 7.56 (d, <sup>3</sup>J<sub>H,H</sub> = 8.3 Hz, 2H, Ar), 7.74 (bs, 1H, NH) ppm; <sup>13</sup>C{<sup>1</sup>H} NMR (125 MHz, CDCl<sub>3</sub>): δ -0.11 (Si(CH<sub>3</sub>)<sub>3</sub>), 16.93 C<sub>6</sub>(CH<sub>3</sub>)<sub>6</sub>), 24.68 (NHCOCH<sub>3</sub>), 63.43 (CHOSi(CH<sub>3</sub>)<sub>3</sub>), 119.37 (CN), 120.14 (C<sub>Ar</sub>), 127.32 (C<sub>Ar</sub>), 131.94 (C<sub>Ar</sub>), 132.15 C<sub>6</sub>(CH<sub>3</sub>)<sub>6</sub>), 139.16 (C<sub>Ar</sub>), 168.80 (NHCOCH<sub>3</sub>) ppm.

**Entry 23. CH<sub>3</sub>COC<sub>6</sub>H<sub>4</sub>CH(CN)(OTMS):**

<sup>1</sup>H NMR (500 MHz, CDCl<sub>3</sub>): δ 0.26 (s, 9H, Si(CH<sub>3</sub>)<sub>3</sub>), 2.22 (s, C<sub>6</sub>(CH<sub>3</sub>)<sub>6</sub>), 2.62 (s, 3H, COCH<sub>3</sub>), 5.55 (s, 1H, CHOSi(CH<sub>3</sub>)<sub>3</sub>), 7.57 (d, <sup>3</sup>J<sub>H,H</sub> = 8.15 Hz, 2H, Ar), 8.00 (d, <sup>3</sup>J<sub>H,H</sub> = 8.15 Hz, 2H, Ar) ppm; <sup>13</sup>C{<sup>1</sup>H} NMR (125 MHz, CDCl<sub>3</sub>): δ -0.13 (Si(CH<sub>3</sub>)<sub>3</sub>), 16.76 C<sub>6</sub>(CH<sub>3</sub>)<sub>6</sub>), 26.98 (COCH<sub>3</sub>), 63.31 (CHOSi(CH<sub>3</sub>)<sub>3</sub>), 118.75 (CN), 126.61 (C<sub>Ar</sub>), 129.10 (C<sub>Ar</sub>), 132.13 C<sub>6</sub>(CH<sub>3</sub>)<sub>6</sub>), 137.97 (C<sub>Ar</sub>), 141.11 (C<sub>Ar</sub>), 197.47 (COCH<sub>3</sub>) ppm.

## $^1\text{H}$ and $^{13}\text{C}$ NMR spectra of the cyanosilylated products in Table 2

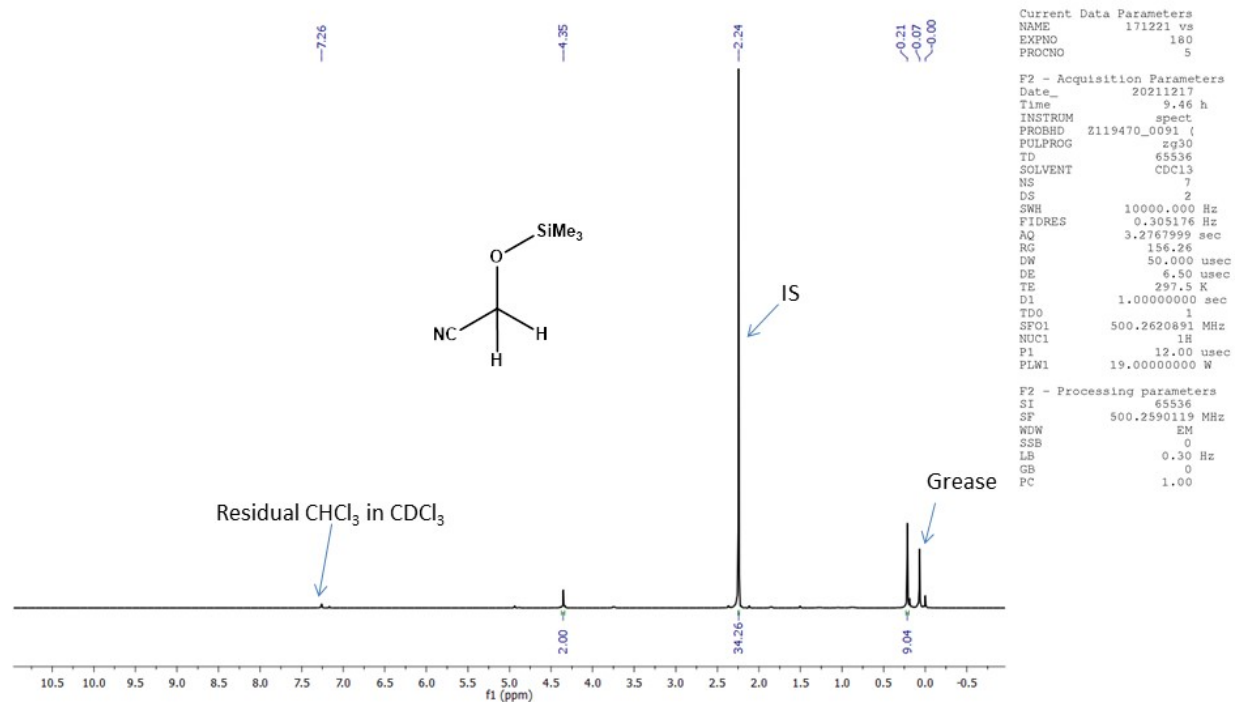

**Figure S28.**  $^1\text{H}$  NMR spectrum of the cyanosilylated product of *p*-formaldehyde.

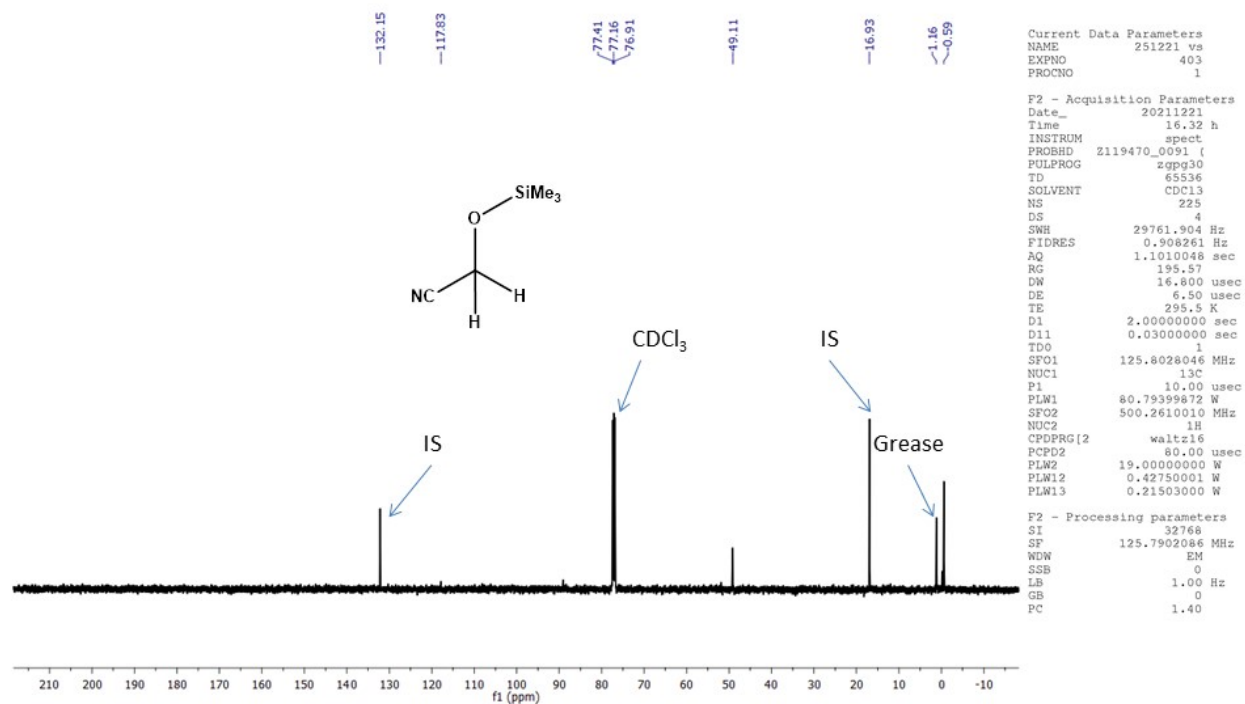

**Figure S29.** <sup>13</sup>C NMR spectrum of the cyanosilylated product of *p*-formaldehyde.

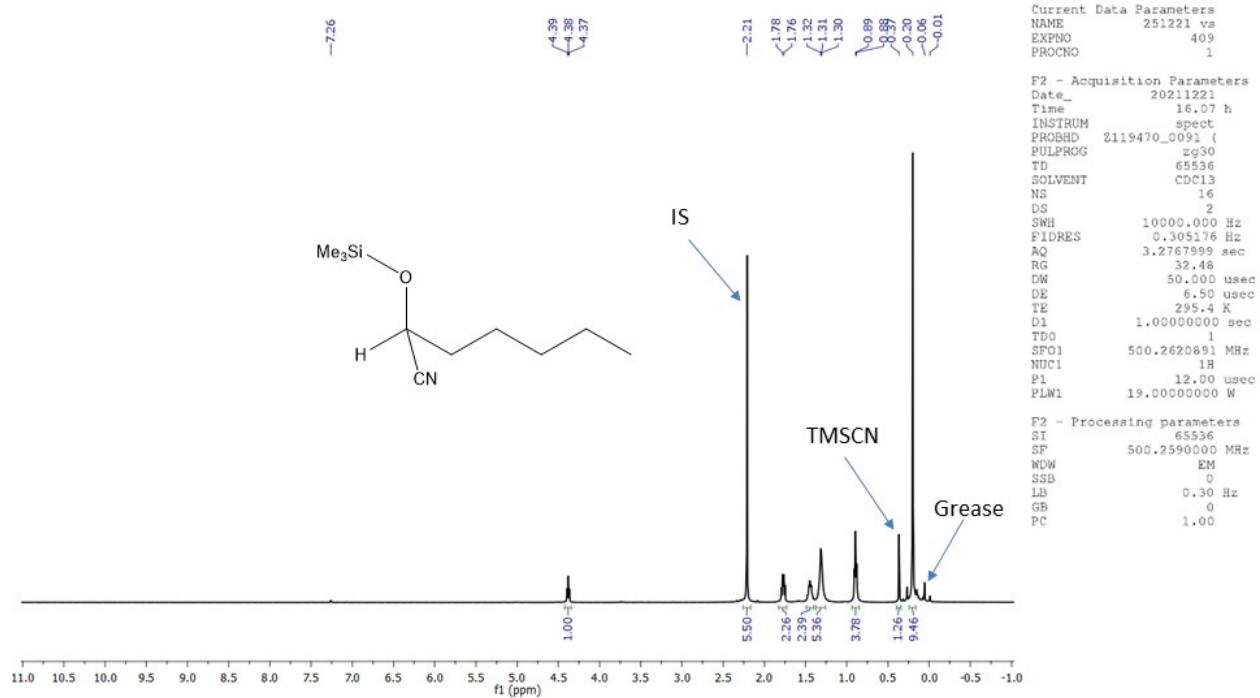

**Figure S30.** <sup>1</sup>H NMR spectrum of the cyanosilylated product of hexanal.

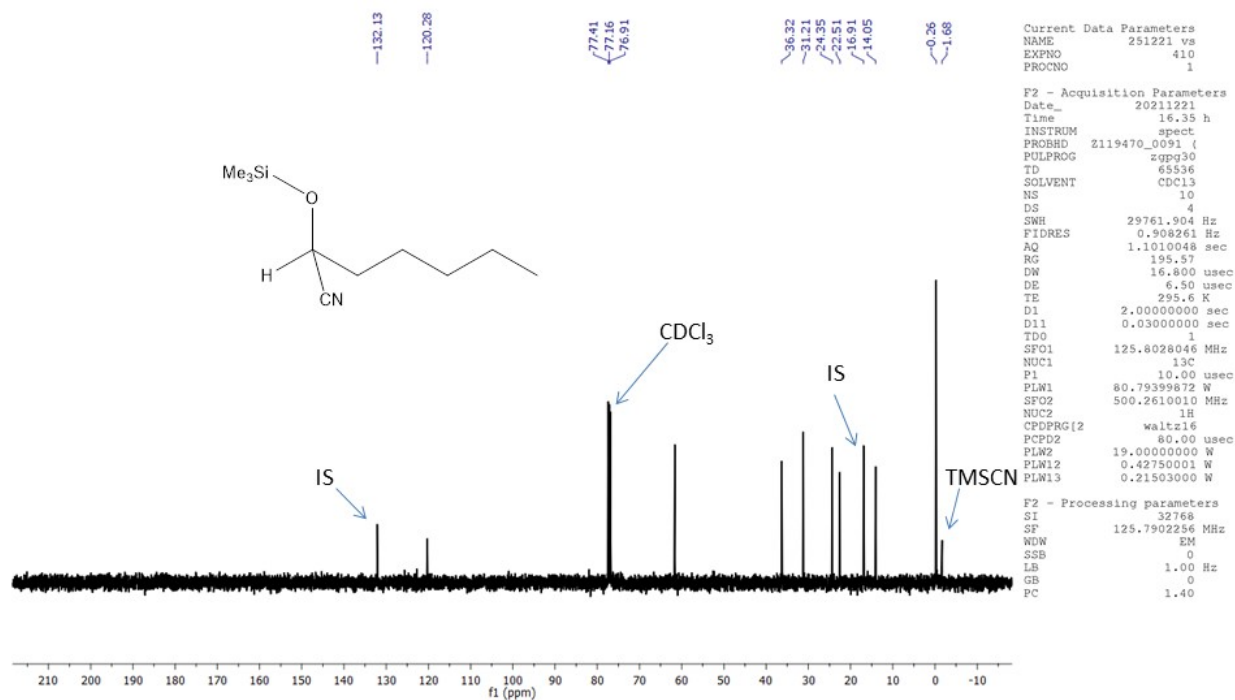

**Figure S314.** <sup>13</sup>C NMR spectrum of the cyanosilylated product of hexanal.

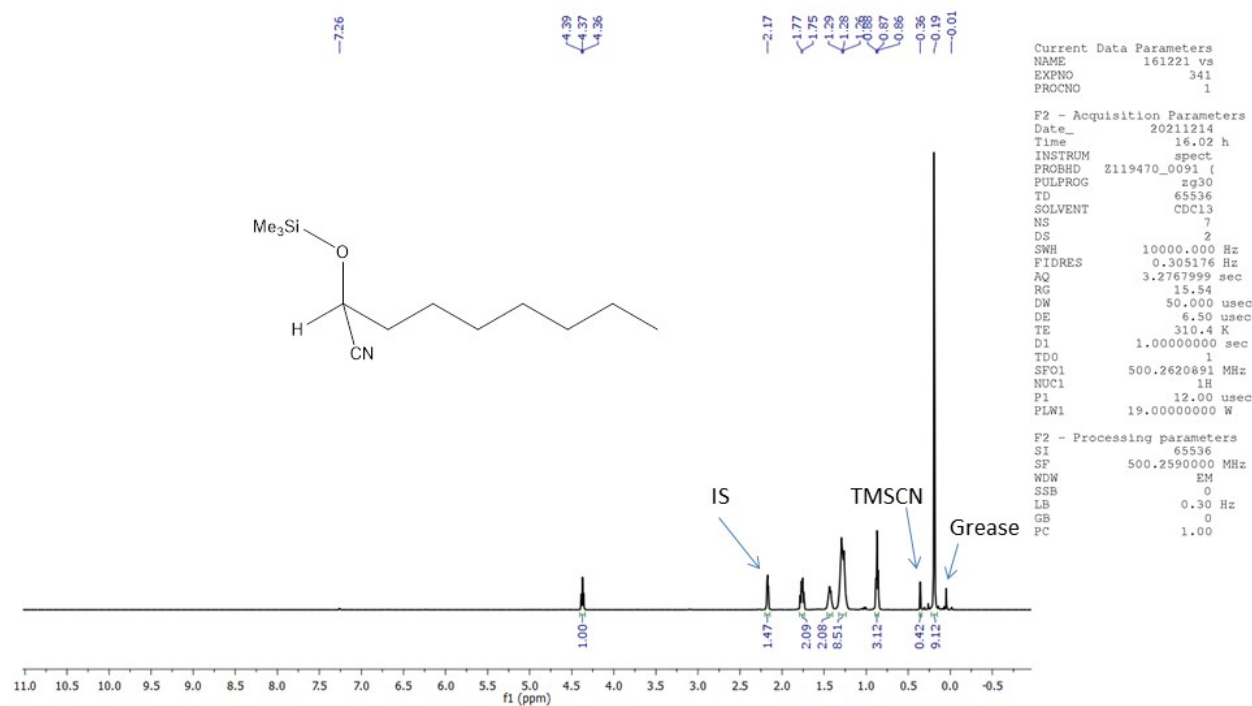

**Figure S325.** <sup>1</sup>H NMR spectrum of the cyanosilylated product of octanal.

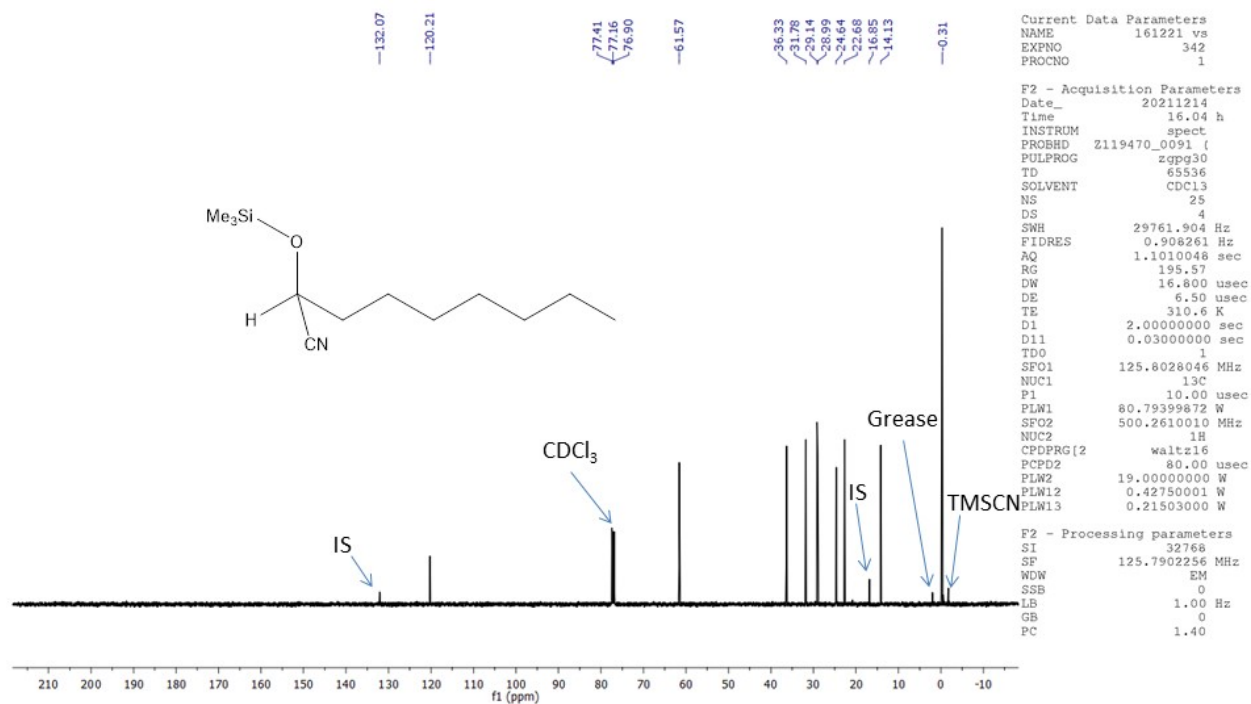

**Figure S336.** <sup>13</sup>C NMR spectrum of the cyanosilylated product of octanal.

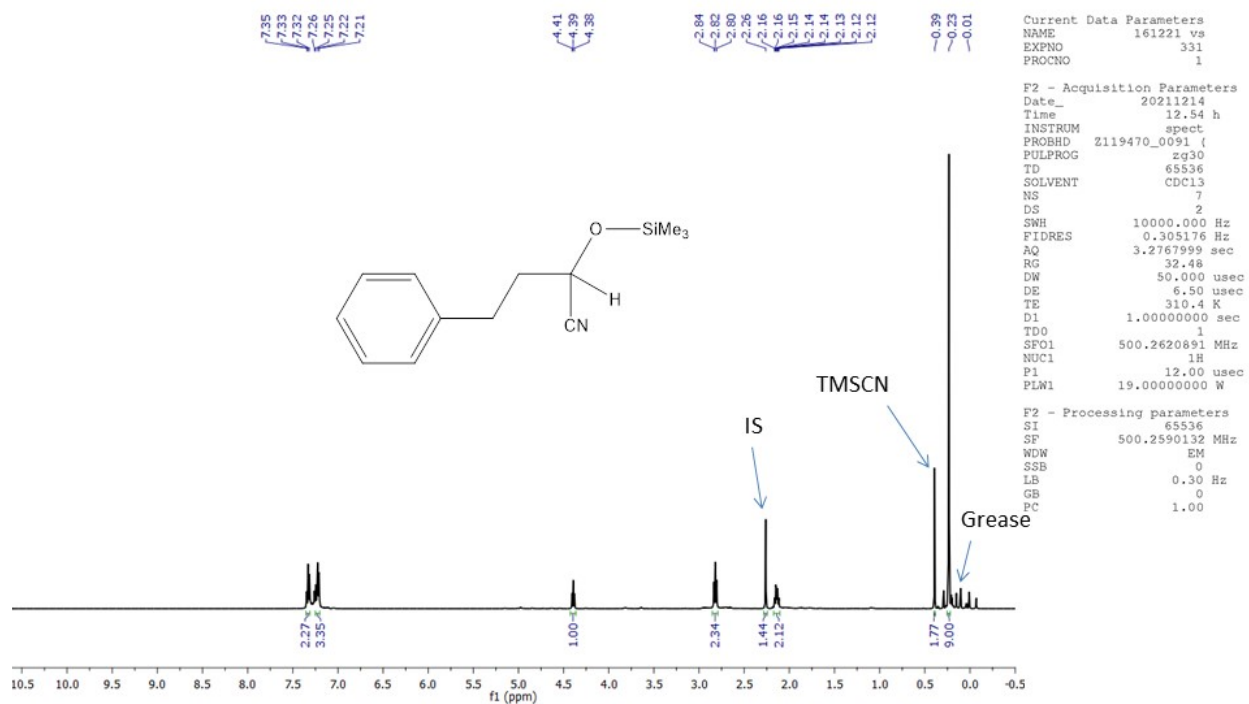

**Figure S347.** <sup>1</sup>H NMR spectrum of the cyanosilylated product of 3-phenylpropanal.

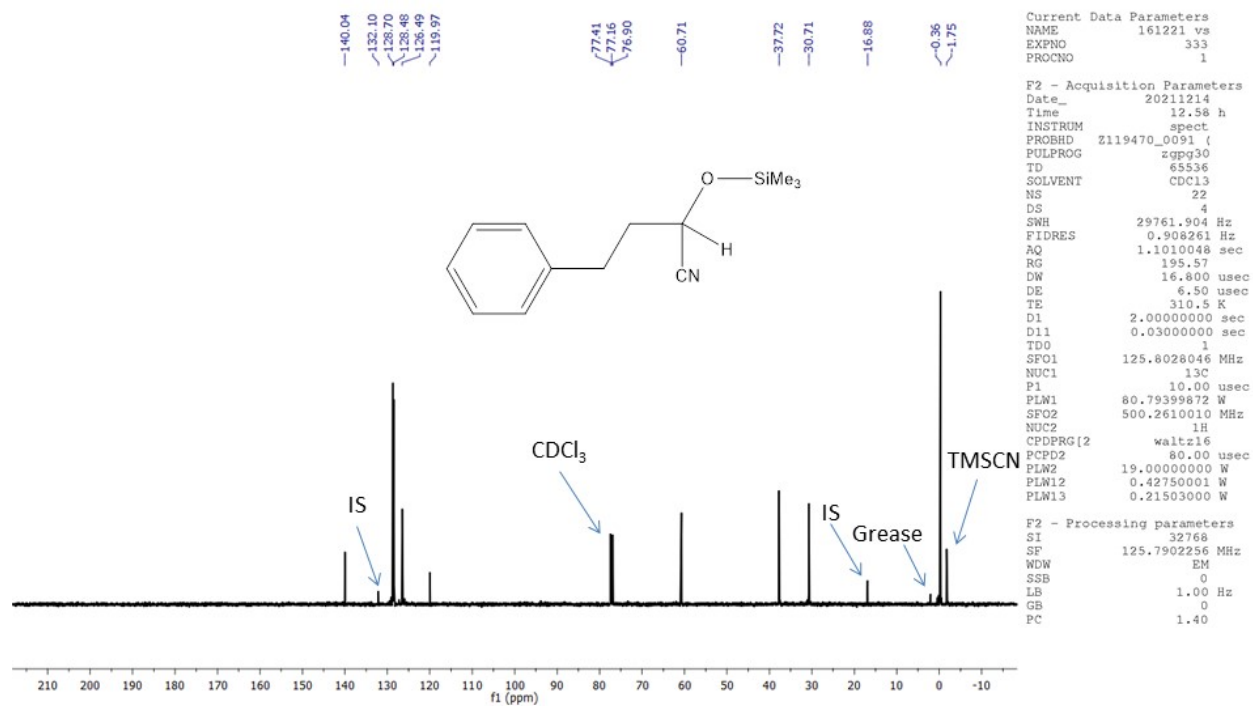

**Figure S358.** <sup>13</sup>C NMR spectrum of the cyanosilylated product of 3-phenylpropanal.

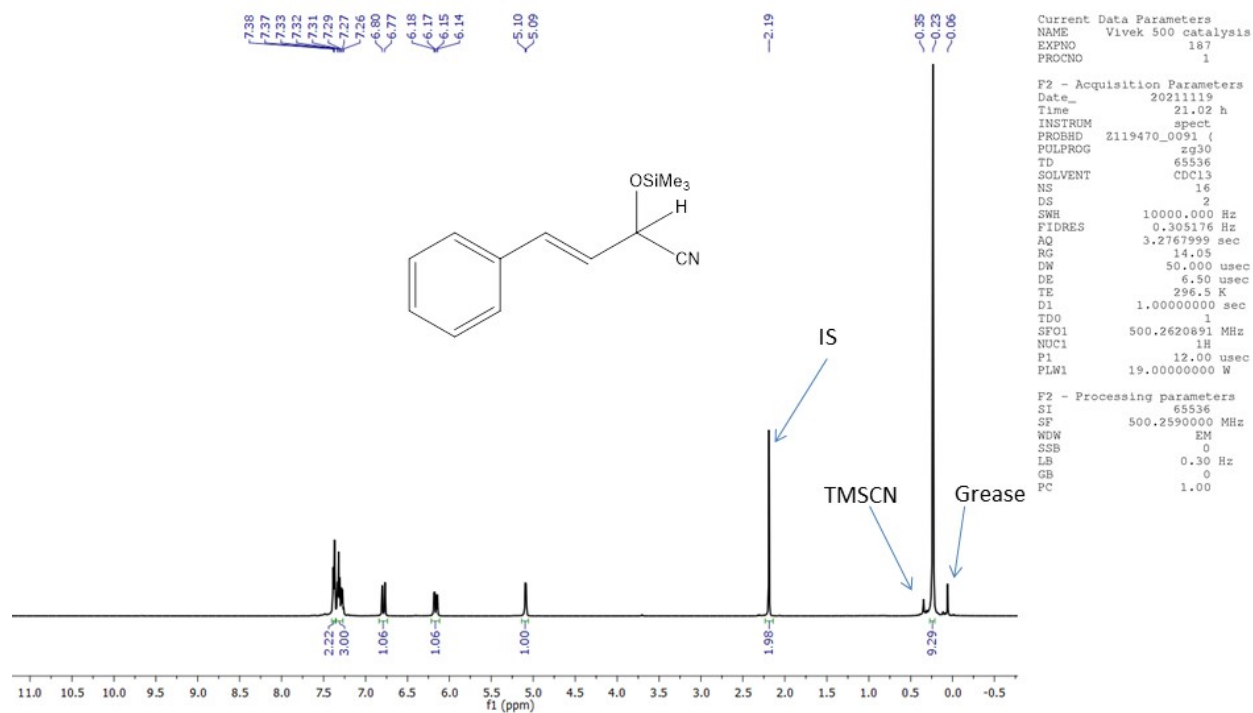

**Figure S369.** <sup>1</sup>H NMR spectrum of the cyanosilylated product of *trans*-cinnamaldehyde.

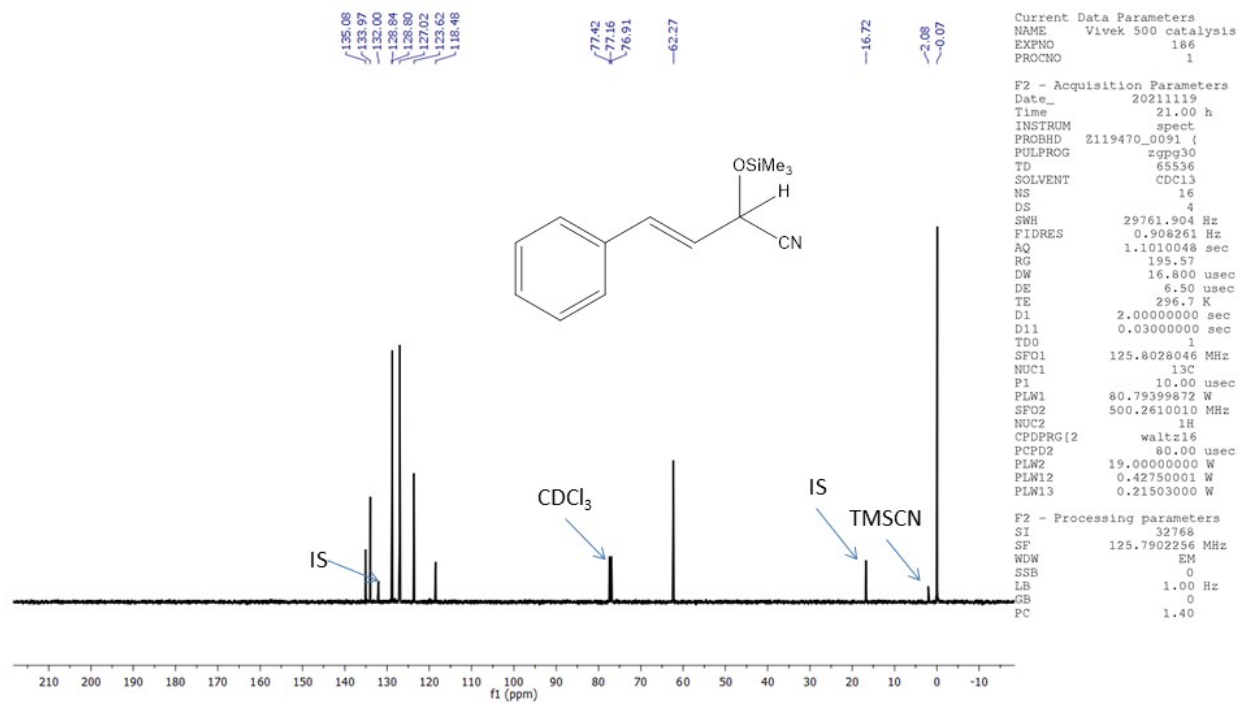

**Figure S4037.** <sup>13</sup>C NMR spectrum of the cyanosilylated product of *trans*-cinnamaldehyde.

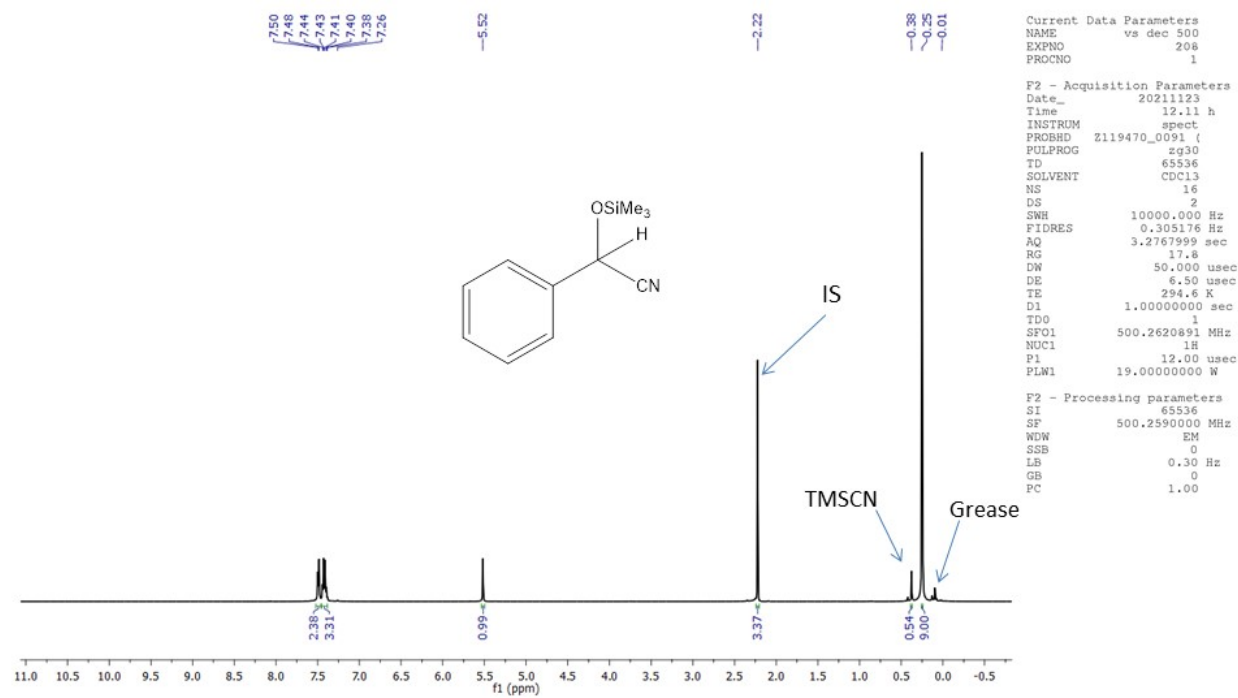

**Figure S41.**  $^1\text{H}$  NMR spectrum of the cyanosilylated product of benzaldehyde.

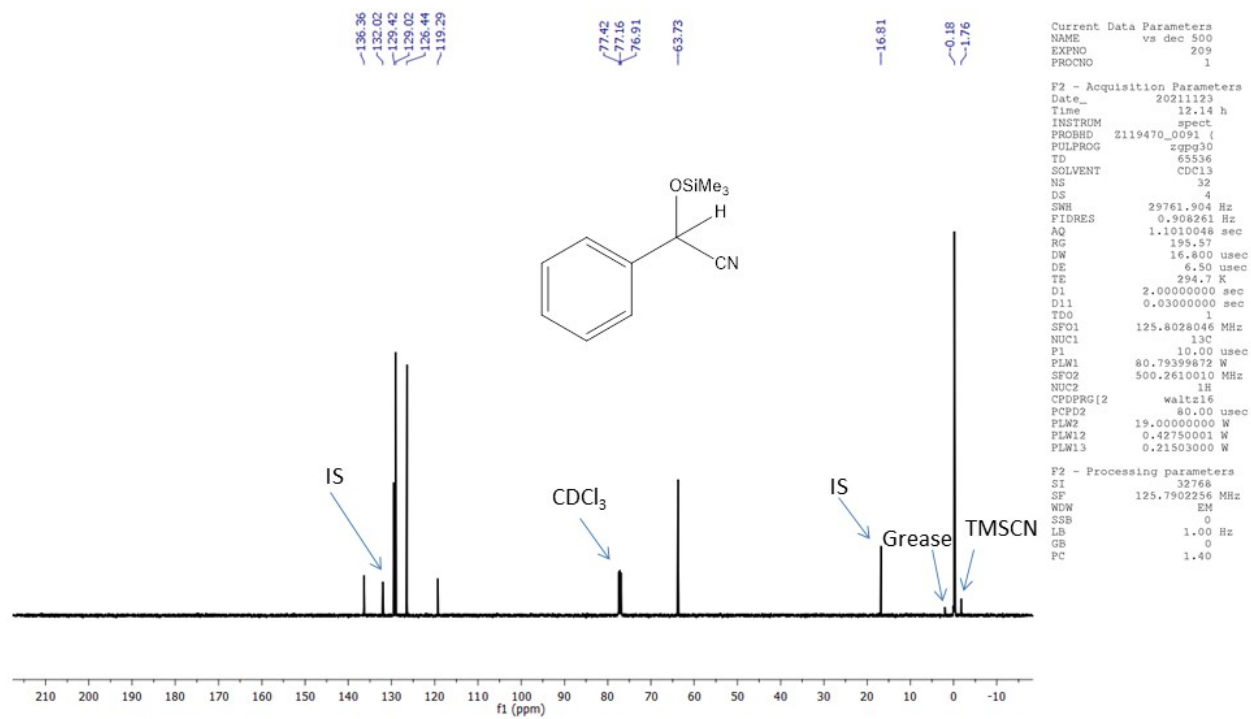

**Figure S42.**  $^{13}\text{C}$  NMR spectrum of the cyanosilylated product of benzaldehyde.

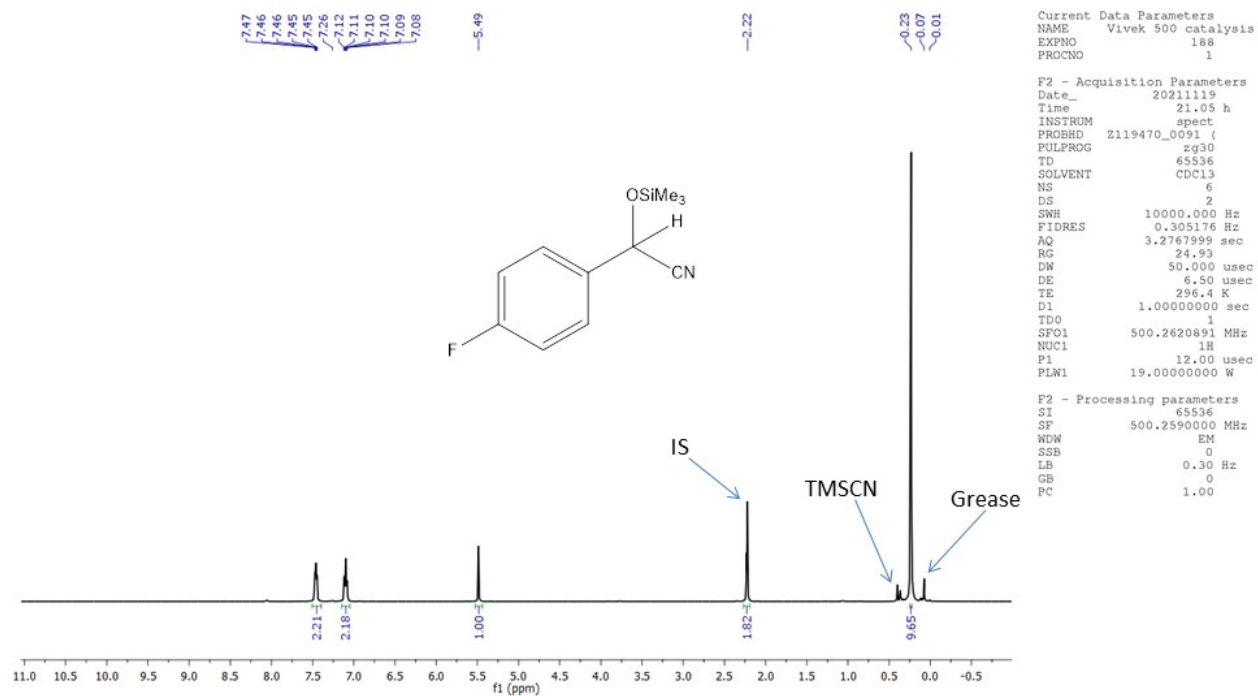

**Figure S43.** <sup>1</sup>H NMR spectrum of the cyanosilylated product of 4-fluorobenzaldehyde.

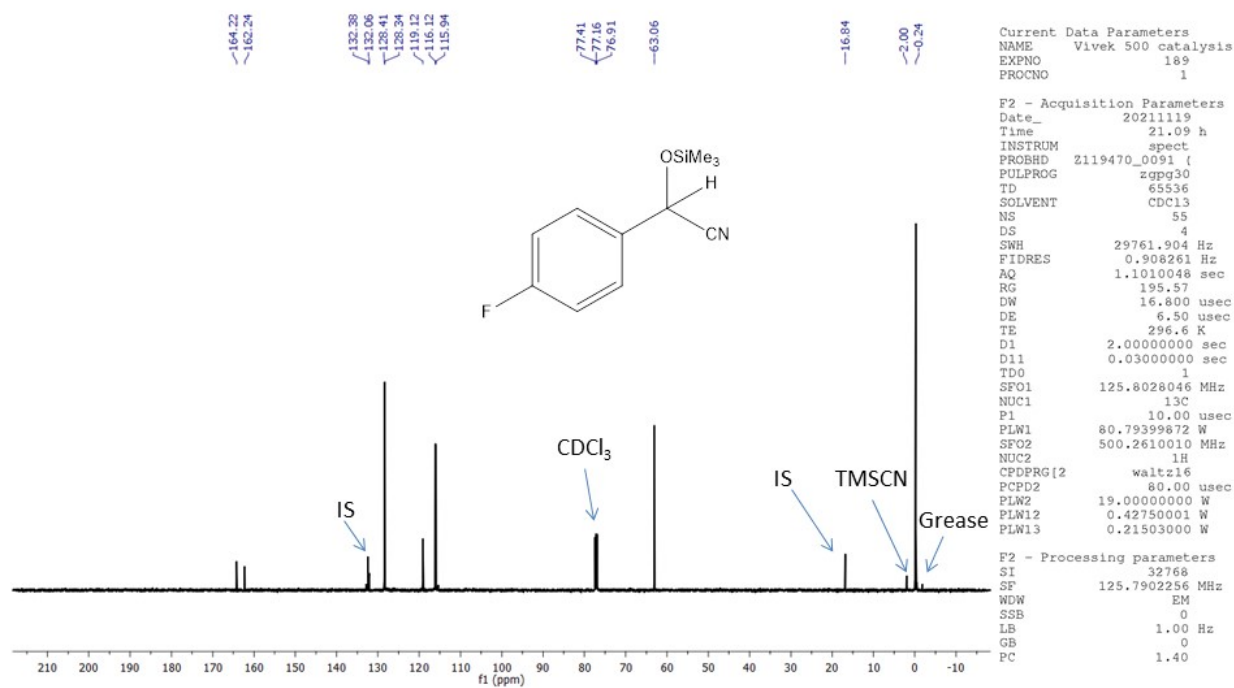

**Figure S38.** <sup>13</sup>C NMR spectrum of the cyanosilylated product of 4-fluorobenzaldehyde.

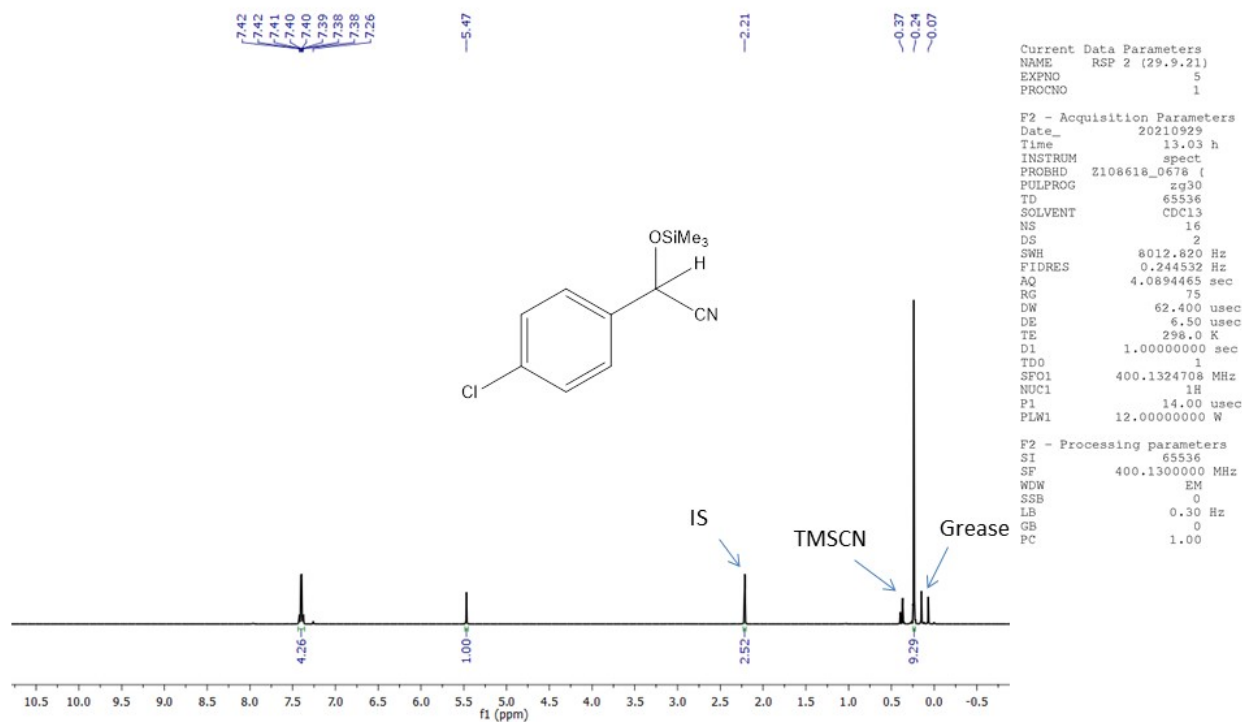

**Figure S39.** <sup>1</sup>H NMR spectrum of the cyanosilylated product of 4-chlorobenzaldehyde.

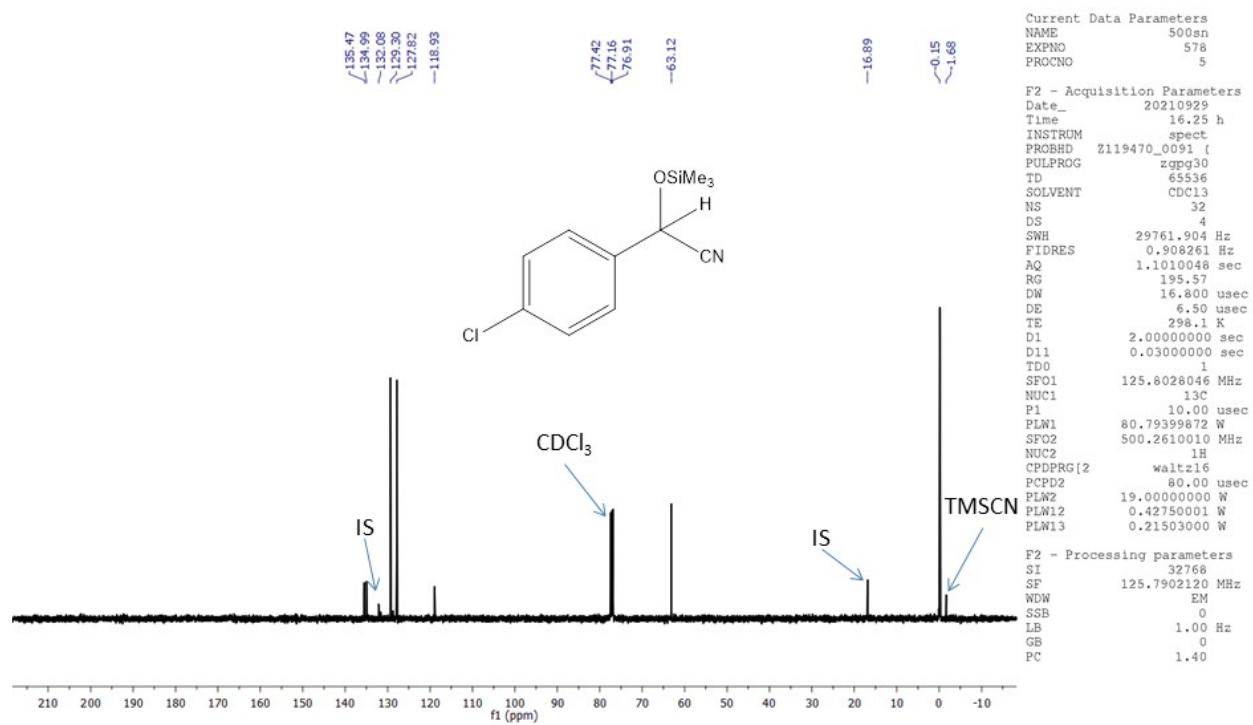

**Figure S40.** <sup>13</sup>C NMR spectrum of the cyanosilylated product of 4-chlorobenzaldehyde.

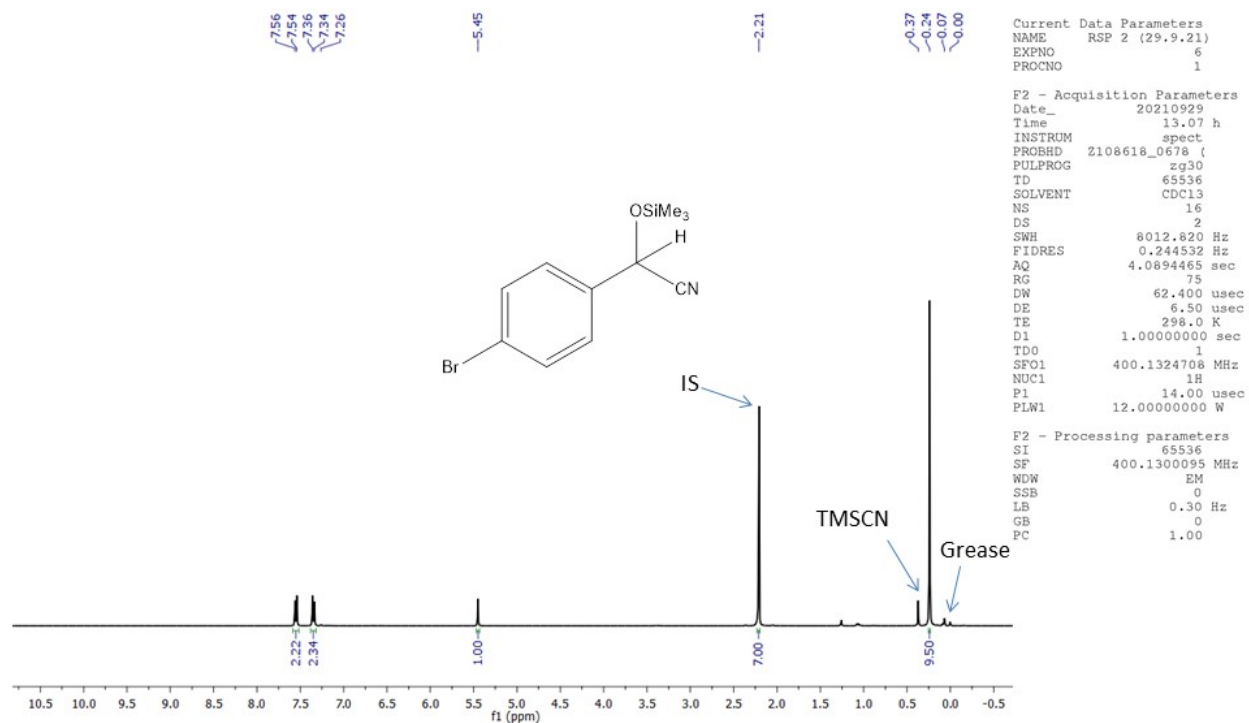

**Figure S41.** <sup>1</sup>H NMR spectrum of the cyanosilylated product of 4-bromobenzaldehyde.

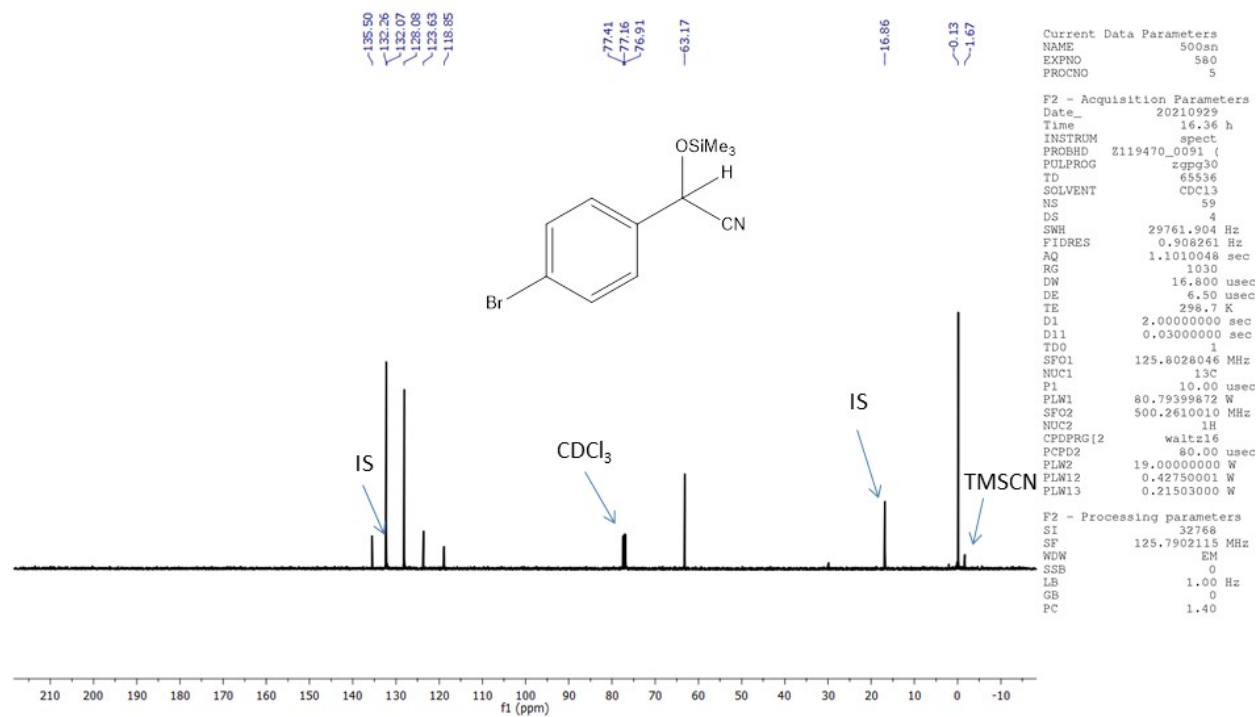

**Figure S42.**  $^{13}\text{C}$  NMR spectrum of the cyanosilylated product of 4-bromobenzaldehyde.

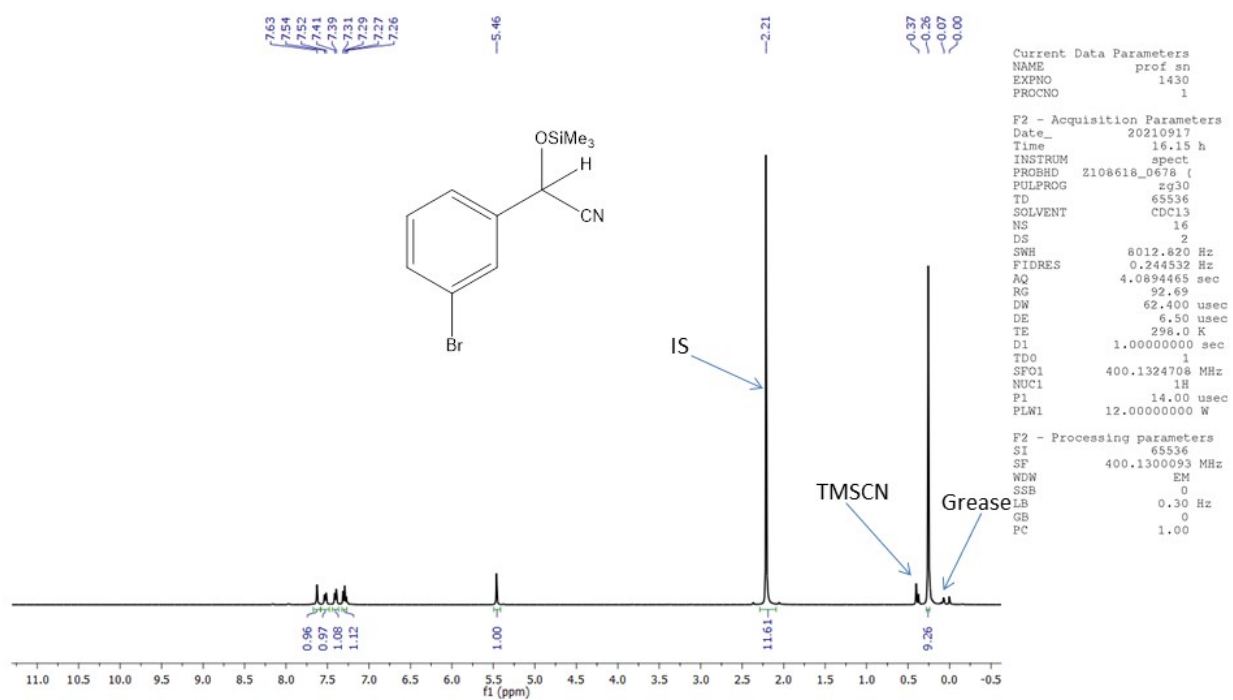

**Figure S43.** <sup>1</sup>H NMR spectrum of the cyanosilylated product of 3-bromobenzaldehyde.

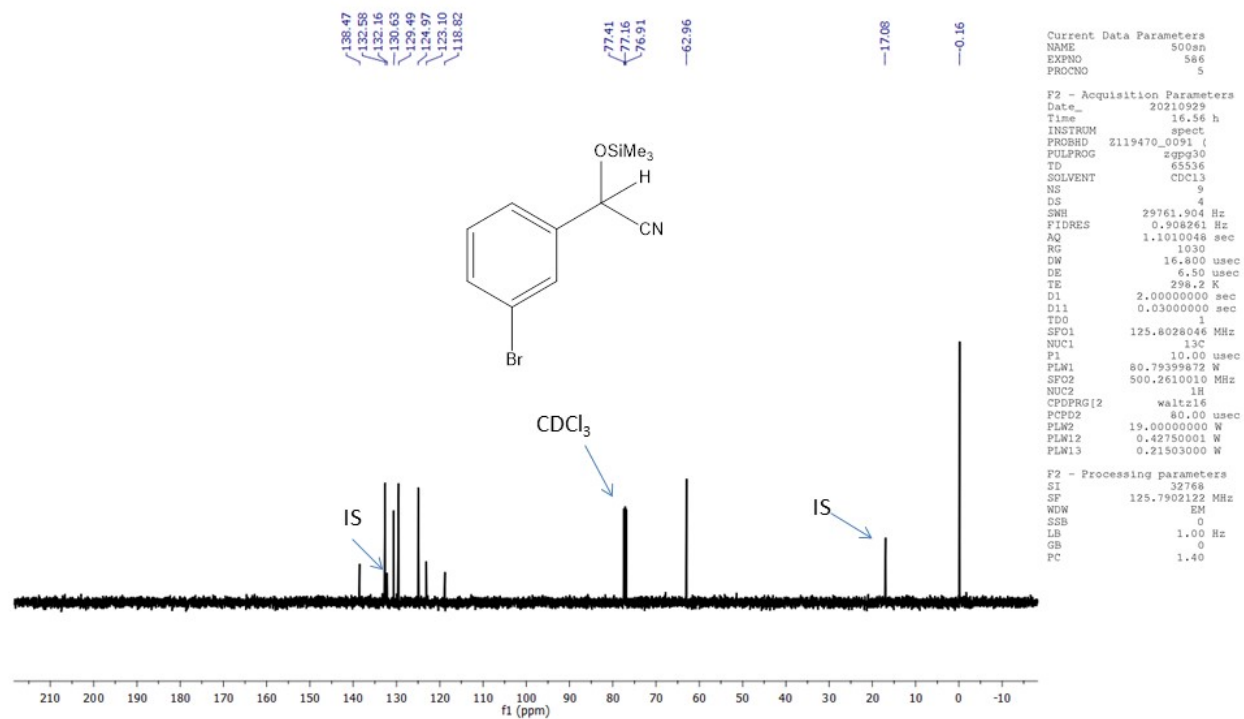

**Figure S50.**  $^{13}\text{C}$  NMR spectrum of the cyanosilylated product of 3-bromobenzaldehyde.

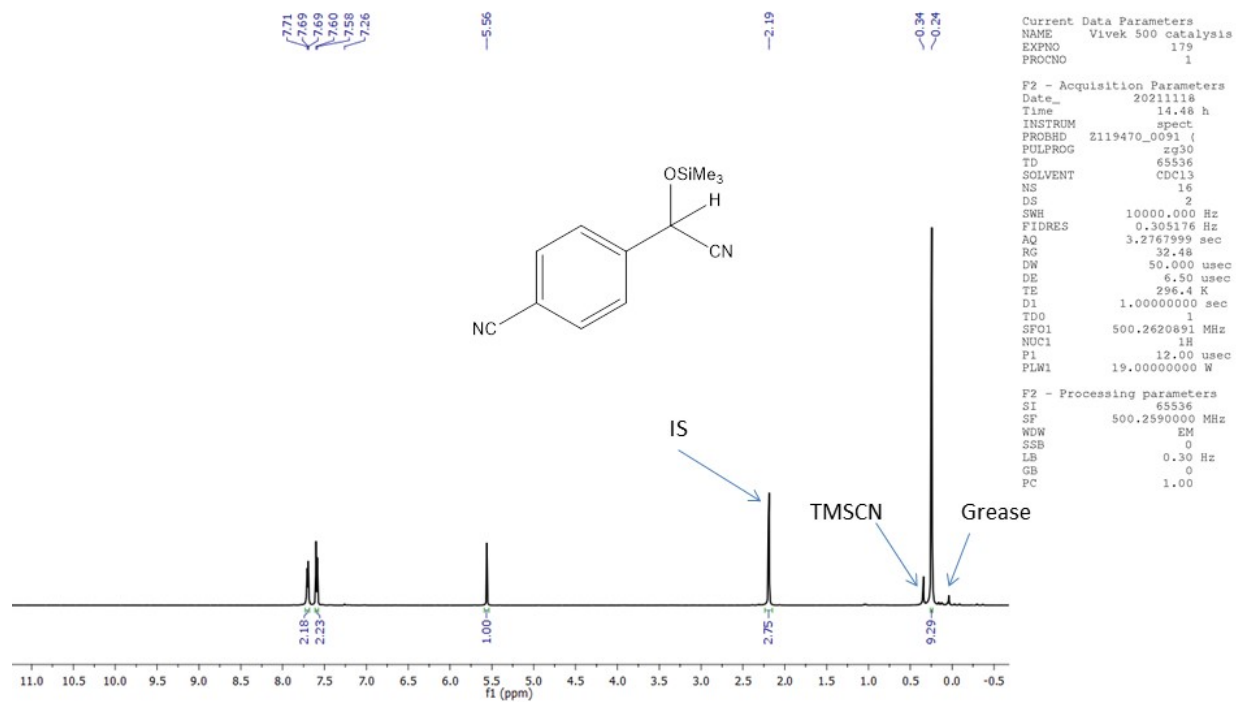

**Figure S51.** <sup>1</sup>H NMR spectrum of the cyanosilylated product of 4-cyanobenzaldehyde.

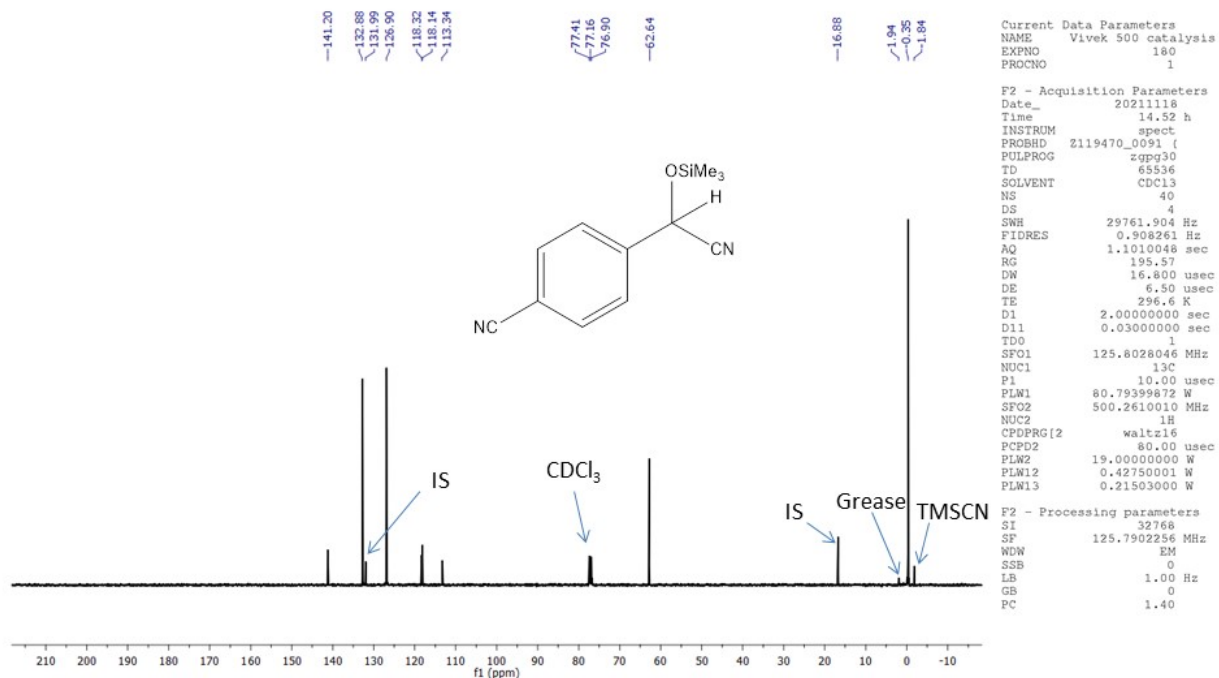

**Figure S52.** <sup>13</sup>C NMR spectrum of the cyanosilylated product of 4-cyanobenzaldehyde.

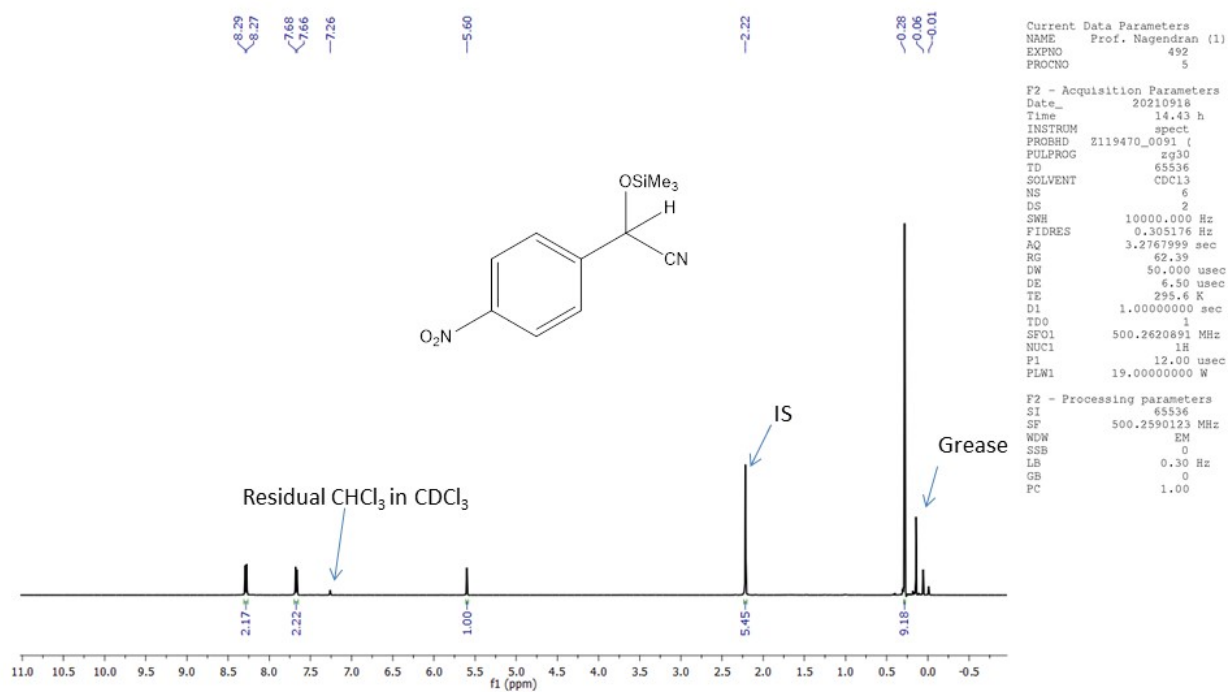

**Figure S44.** <sup>1</sup>H NMR spectrum of the cyanosilylated product of 4-nitrobenzaldehyde.

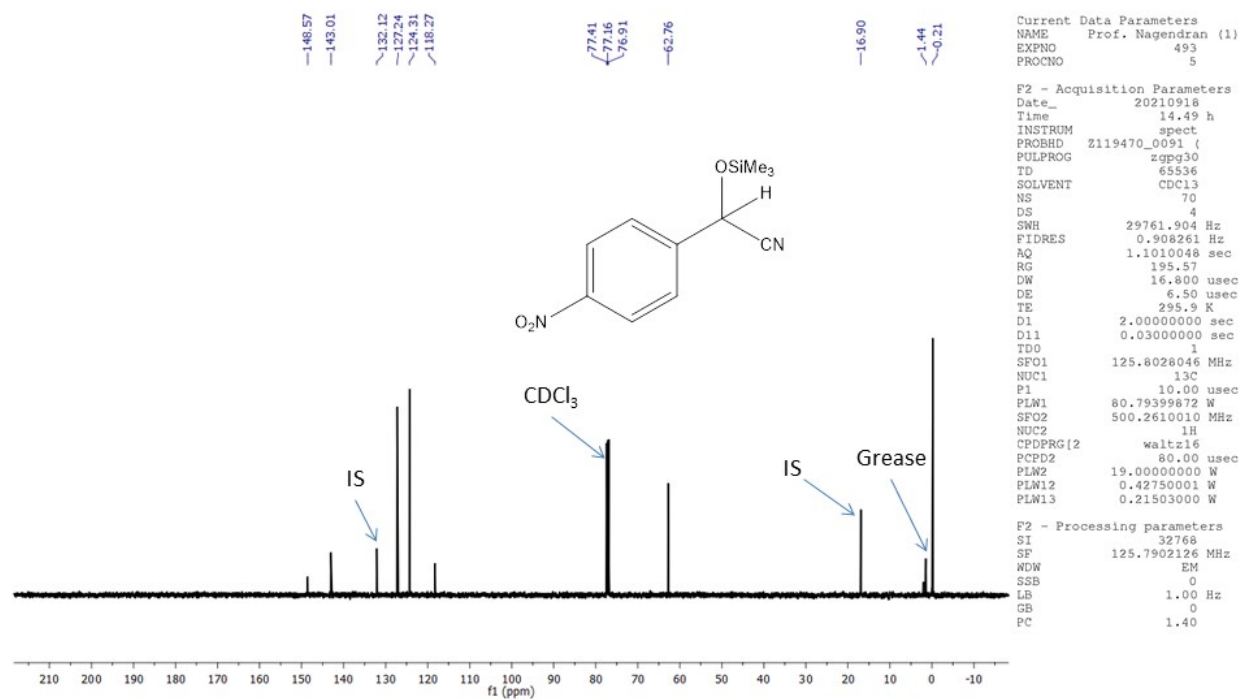

**Figure S45.** <sup>13</sup>C NMR spectrum of the cyanosilylated product of 4-nitrobenzaldehyde.

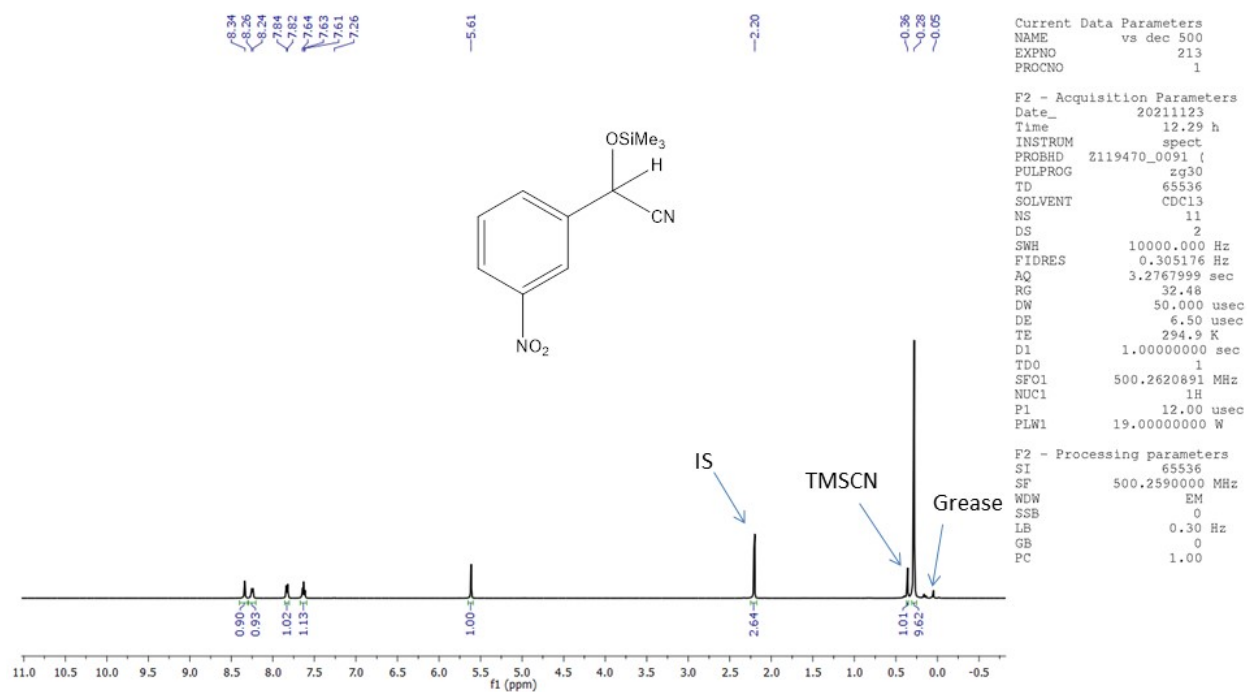

**Figure S46.** <sup>1</sup>H NMR spectrum of the cyanosilylated product of 3-nitrobenzaldehyde.

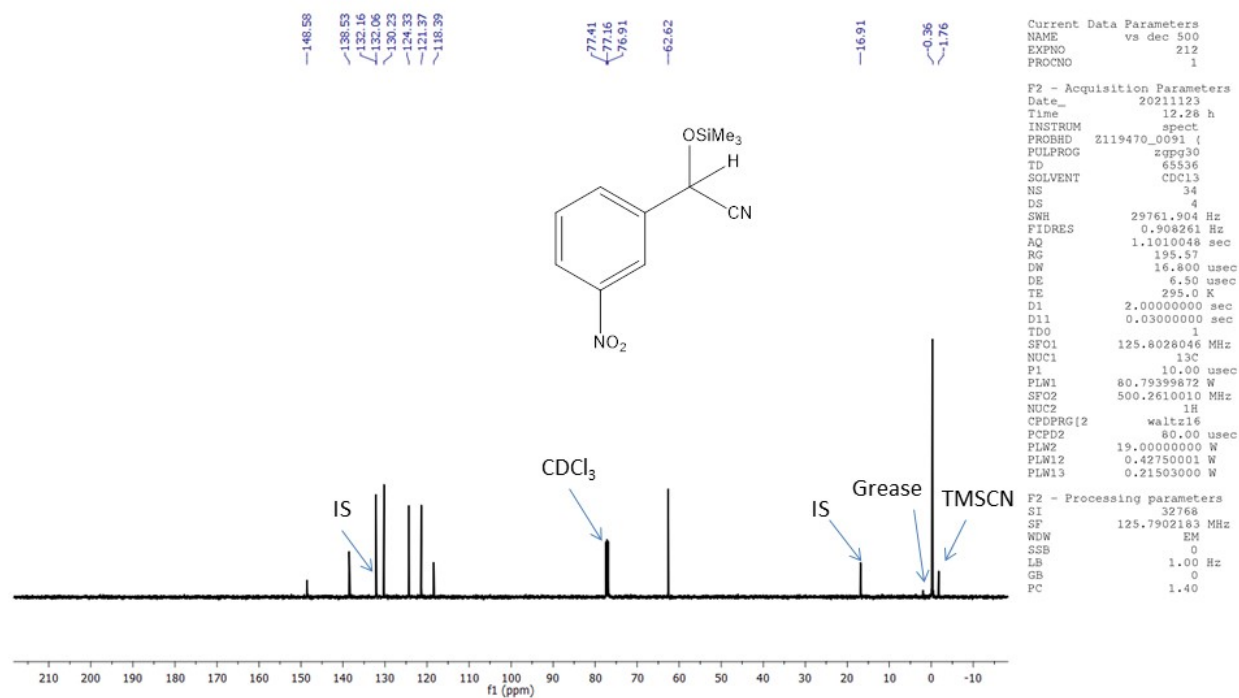

**Figure S47.** <sup>13</sup>C NMR spectrum of the cyanosilylated product of 3-nitrobenzaldehyde.

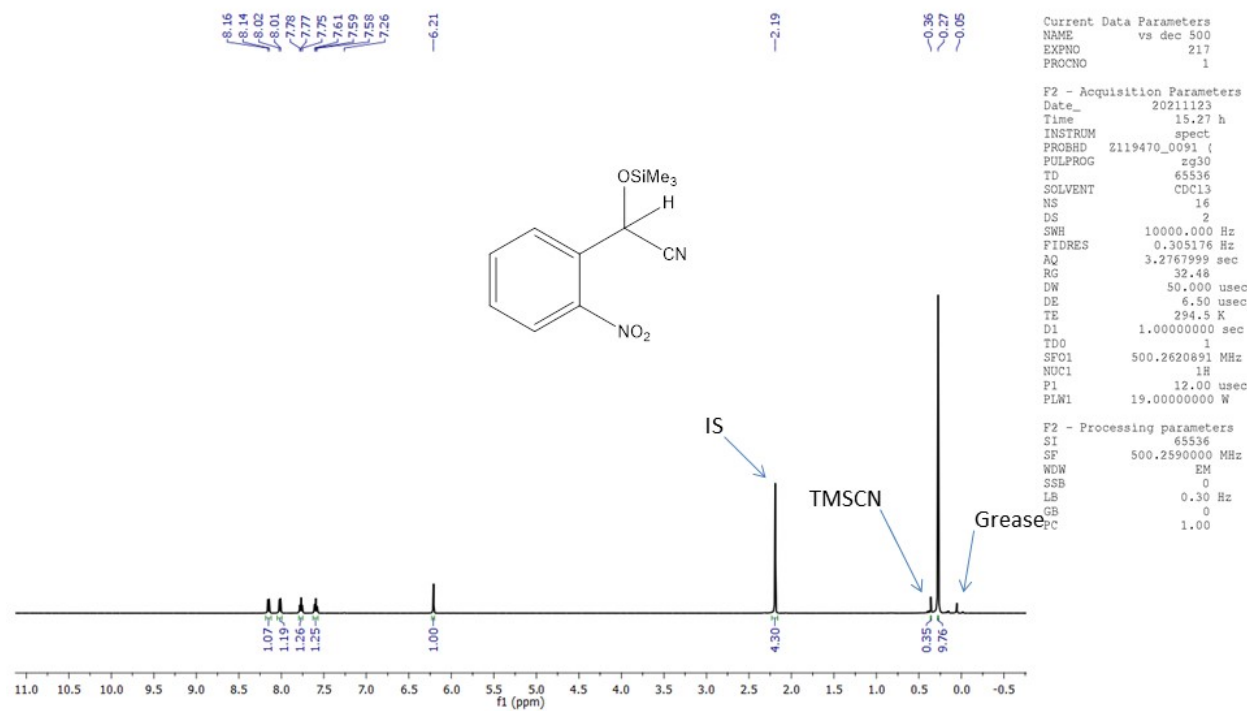

**Figure S48.**  $^1\text{H}$  NMR spectrum of the cyanosilylated product of 2-nitrobenzaldehyde.

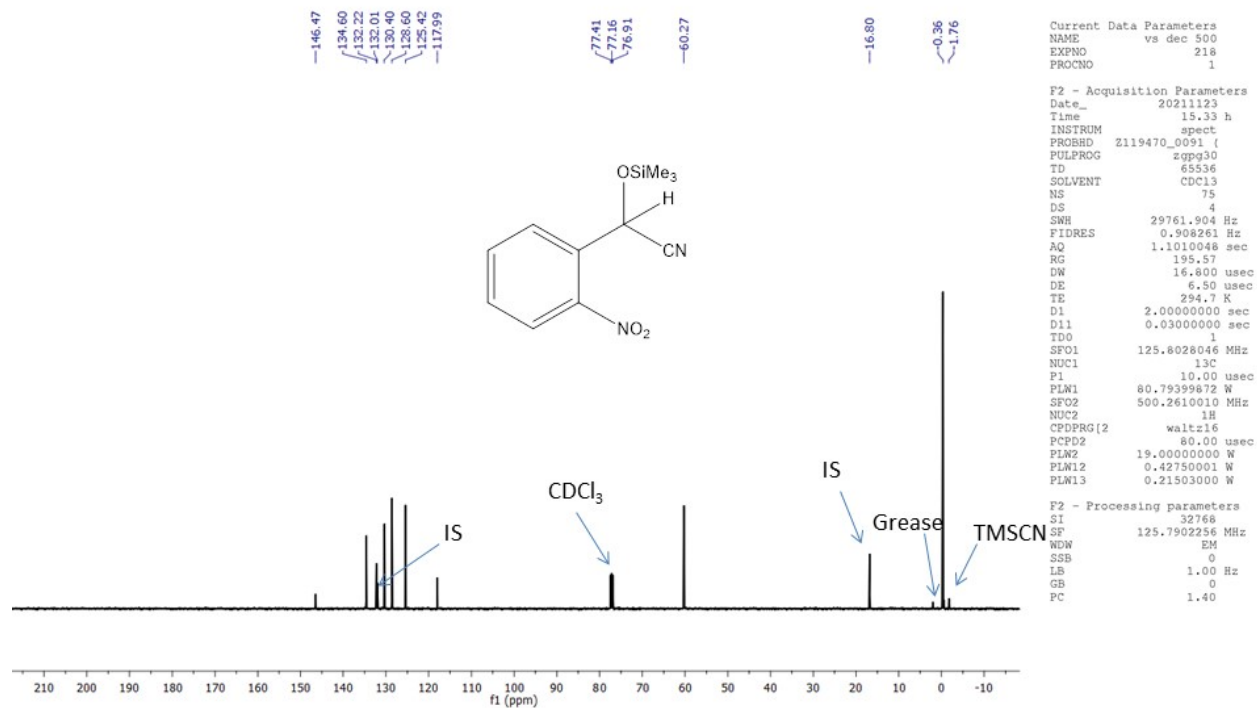

**Figure S49.** <sup>13</sup>C NMR spectrum of the cyanosilylated product of 2-nitrobenzaldehyde.

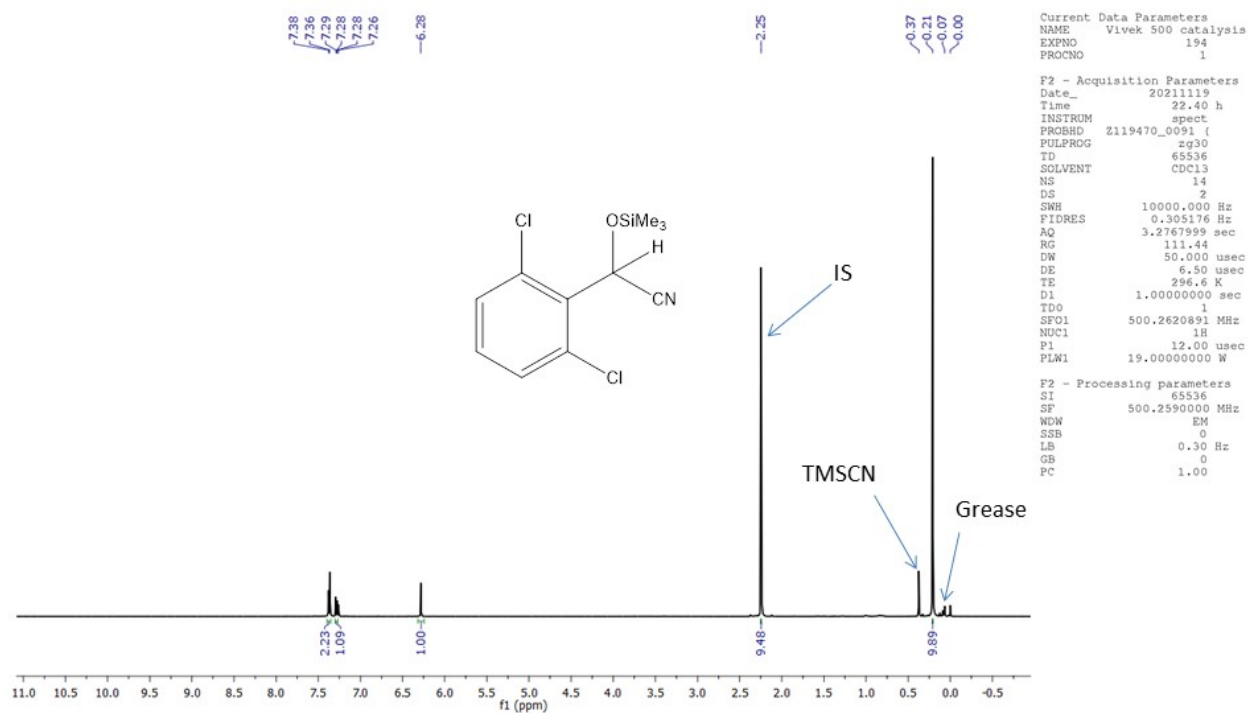

**Figure S50.**  $^1\text{H}$  NMR spectrum of the cyanosilylated product of 2,6-dichlorobenzaldehyde.

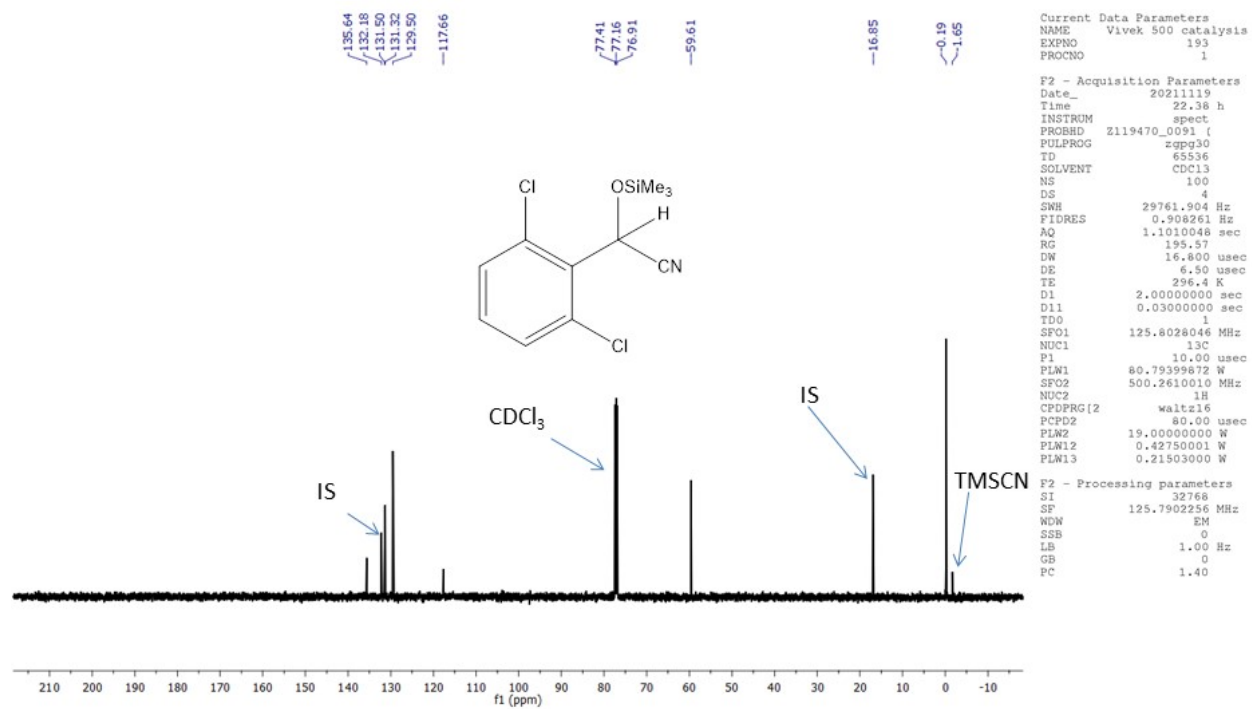

**Figure S60.**  $^{13}\text{C}$  NMR spectrum of the cyanosilylated product of 2,6-dichlorobenzaldehyde.

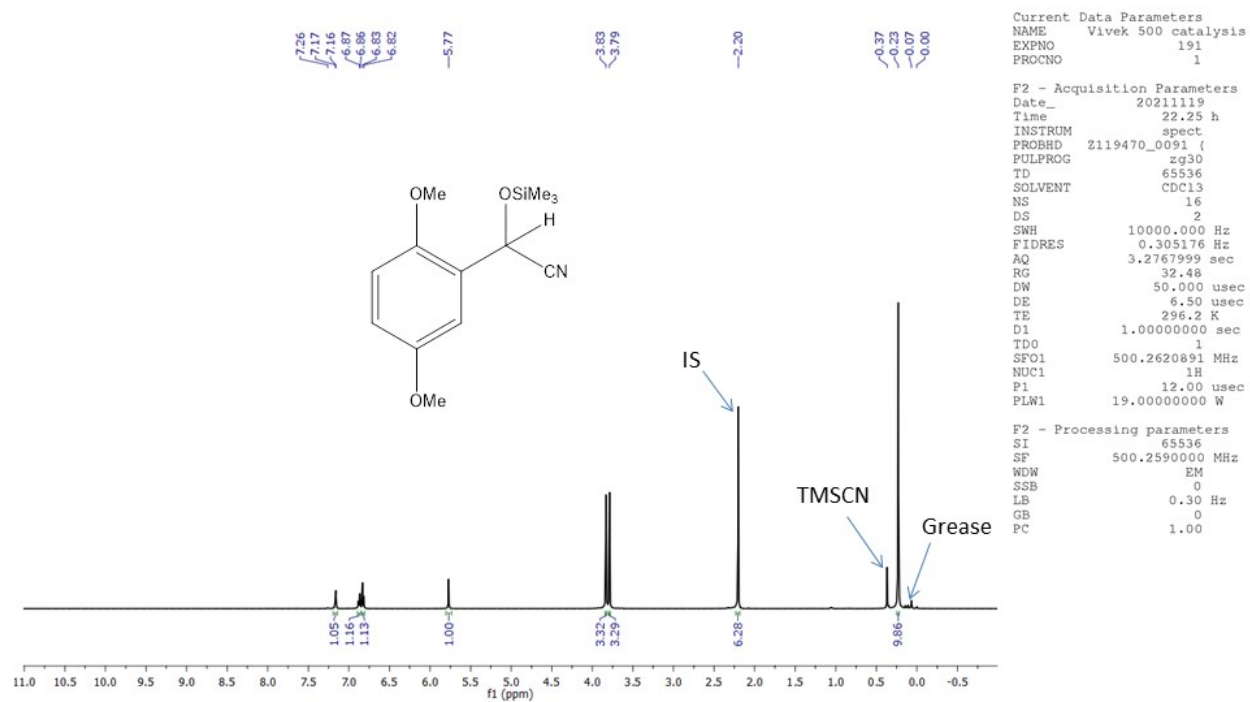

**Figure S61.** <sup>1</sup>H NMR spectrum of the cyanosilylated product of 2,5-dimethoxybenzaldehyde.

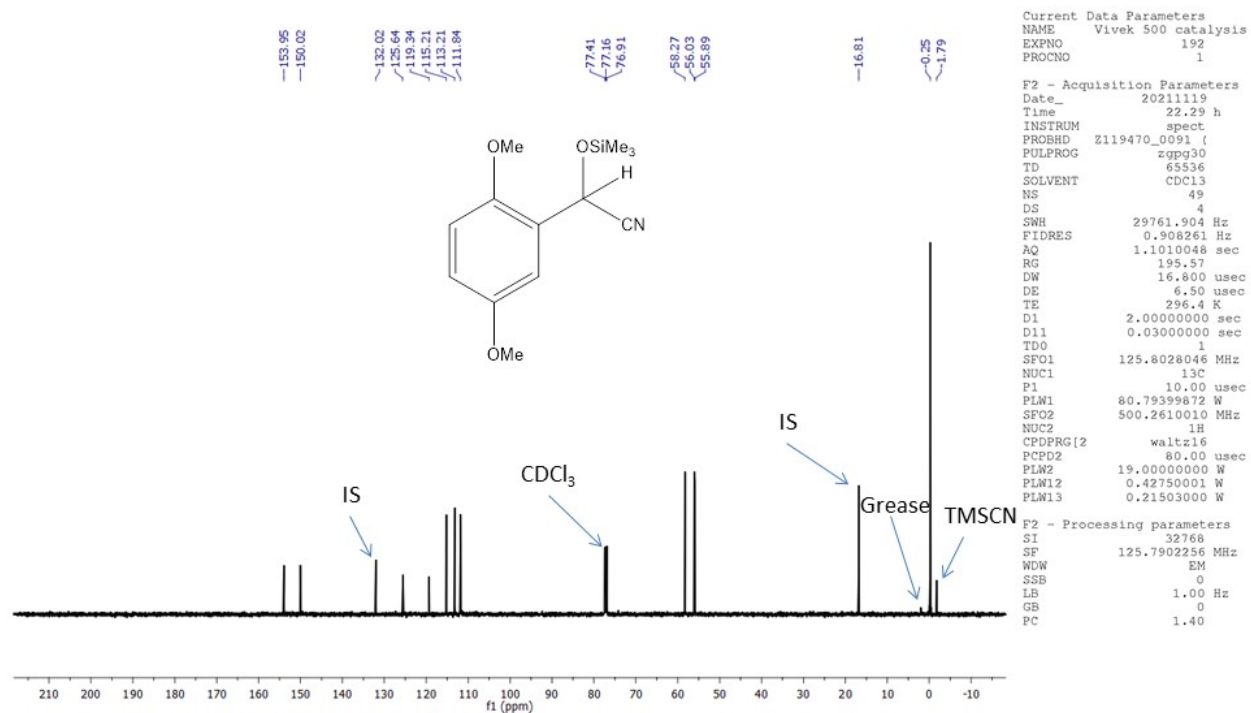

**Figure S62.**  $^{13}\text{C}$  NMR spectrum of the cyanosilylated product of 2,5-dimethoxybenzaldehyde.

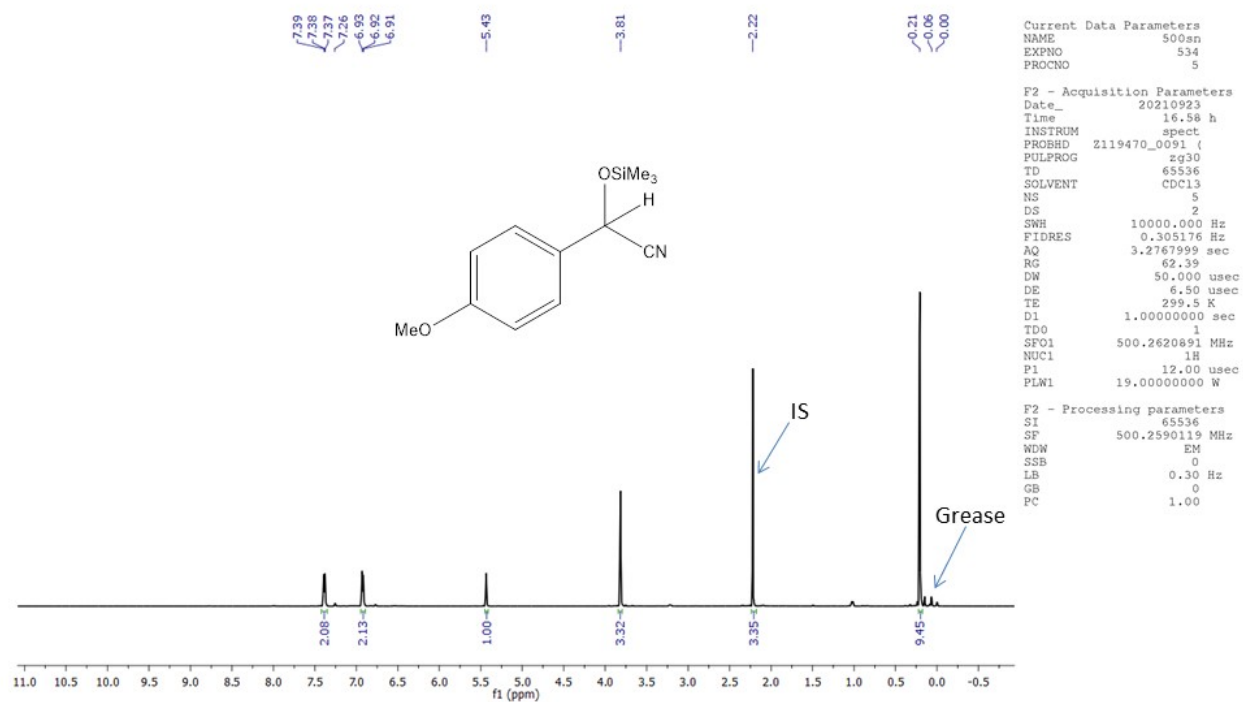

**Figure S51.**  $^1\text{H}$  NMR spectrum of the cyanosilylated product of 4-methoxybenzaldehyde.

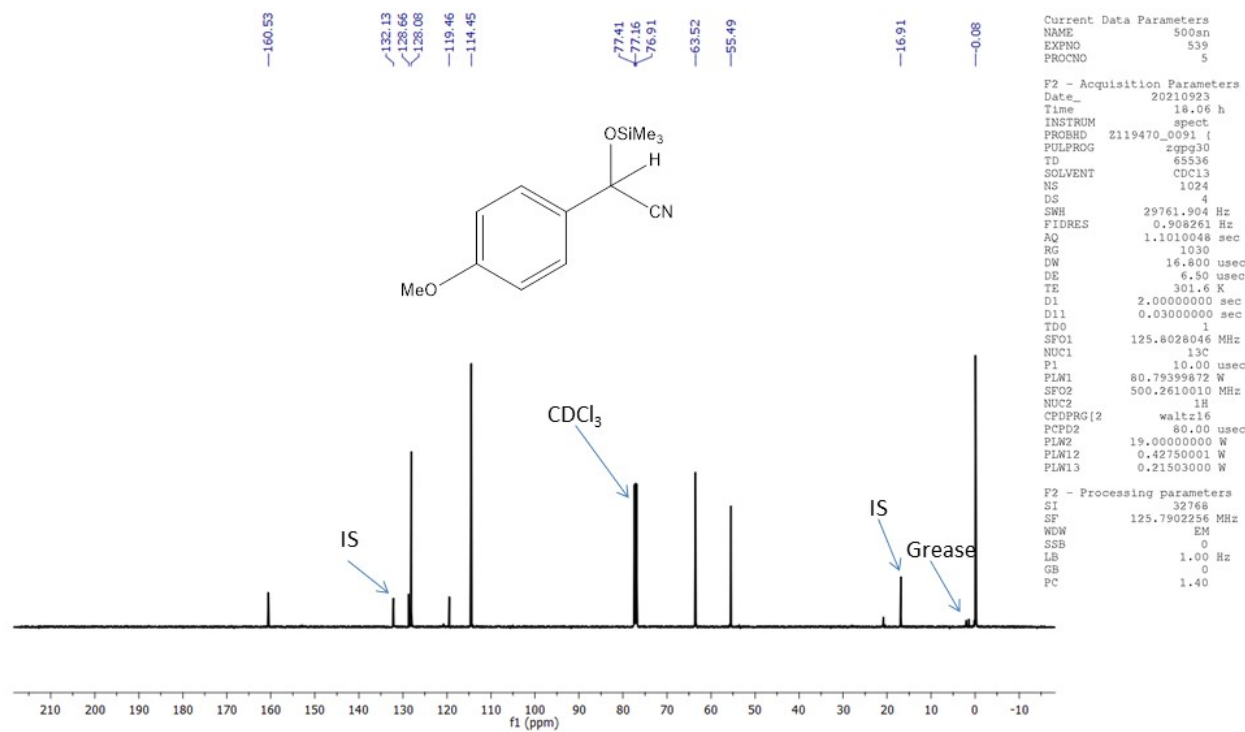

**Figure S52.** <sup>13</sup>C NMR spectrum of the cyanosilylated product of 4-methoxybenzaldehyde.

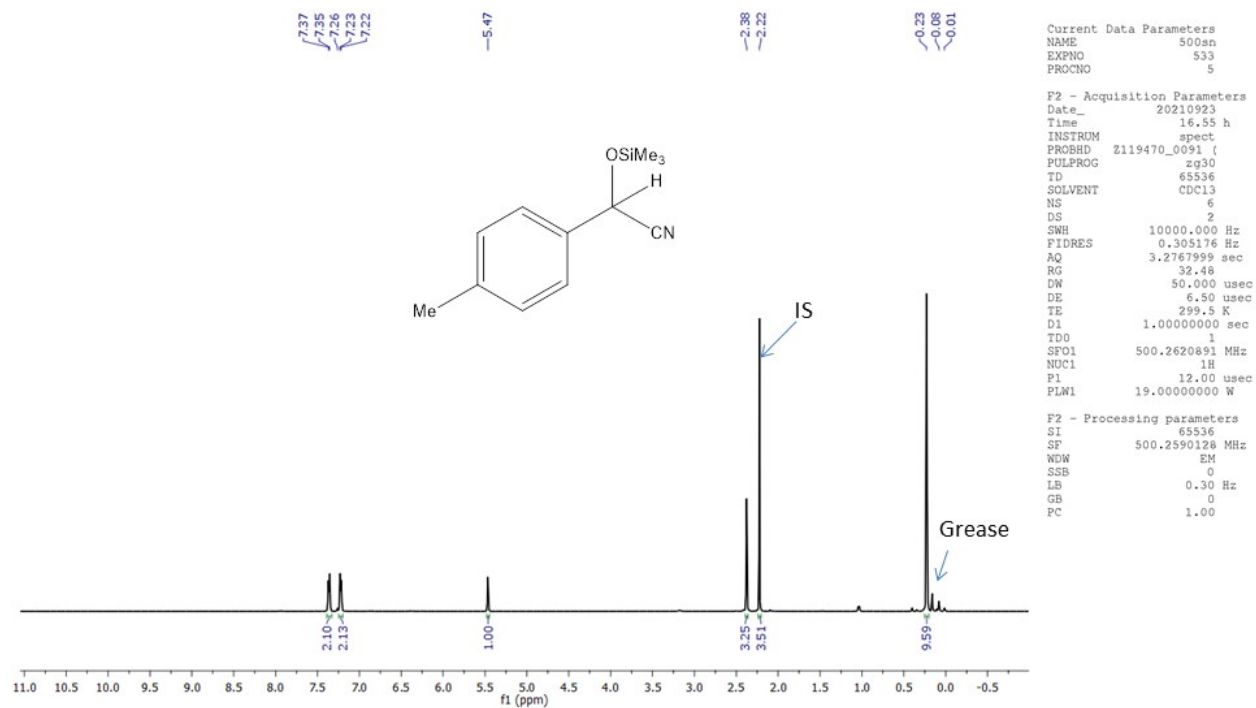

**Figure S53.**  $^1\text{H}$  NMR spectrum of the cyanosilylated product of 4-methylbenzaldehyde.

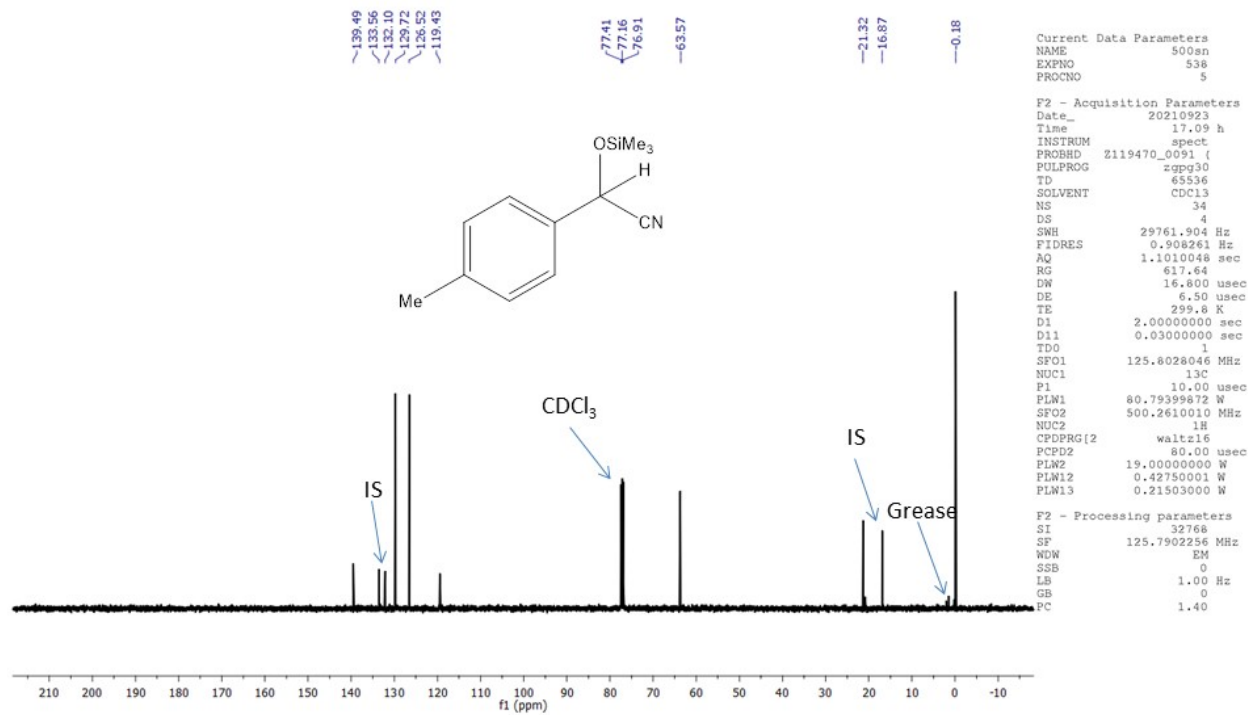

**Figure S54.** <sup>13</sup>C NMR spectrum of the cyanosilylated product of 4-methylbenzaldehyde.



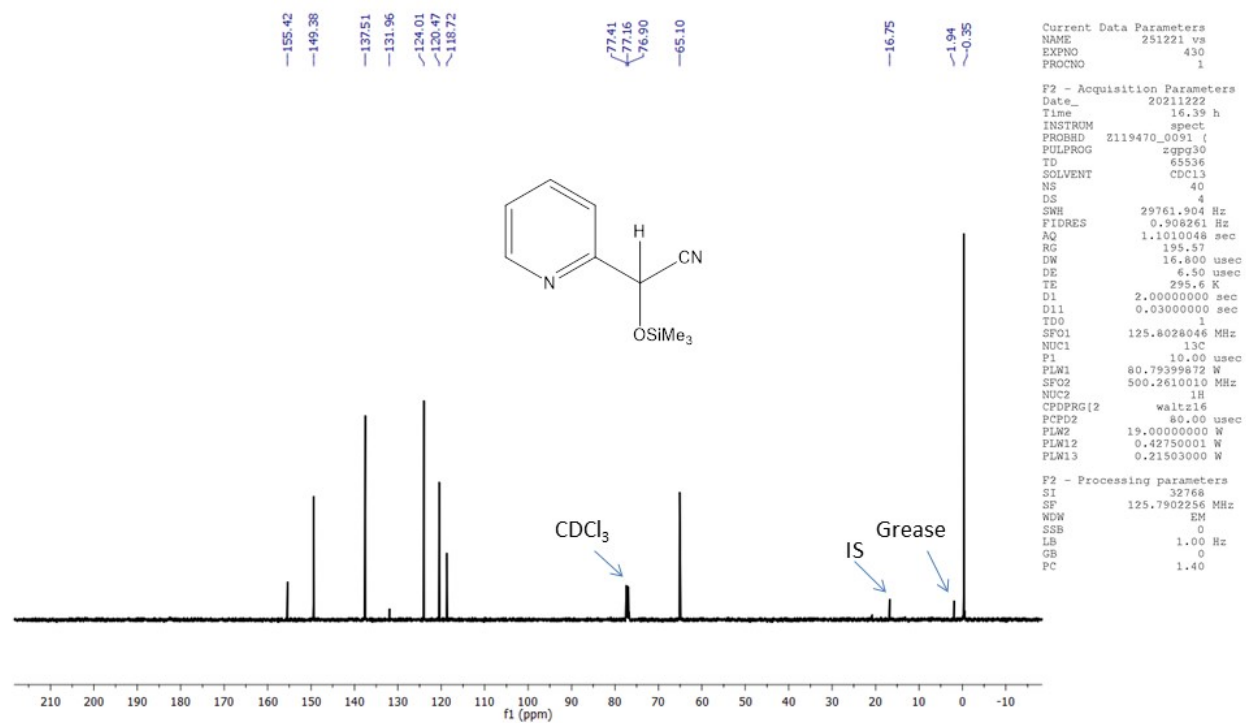

**Figure S56.** <sup>13</sup>C NMR spectrum of the cyanosilylated product of pyridine-2-carbaldehyde.

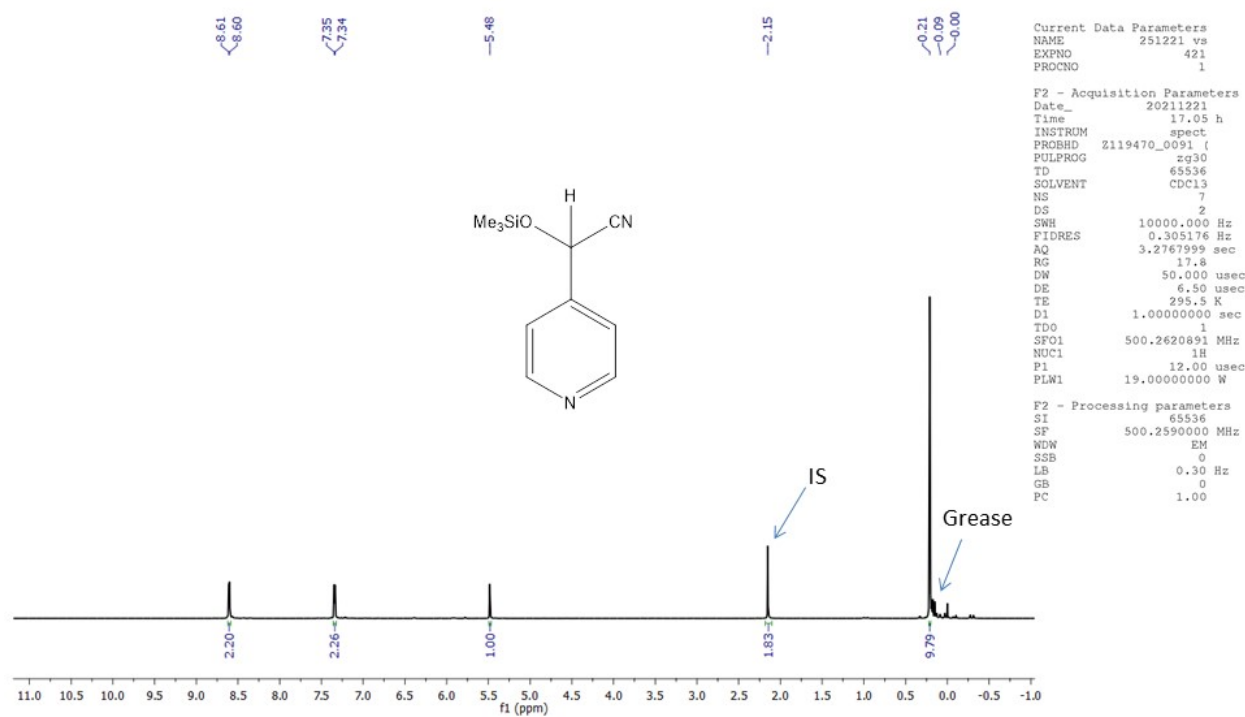

**Figure S57.**  $^1\text{H}$  NMR spectrum of the cyanosilylated product of pyridine-4-carbaldehyde.

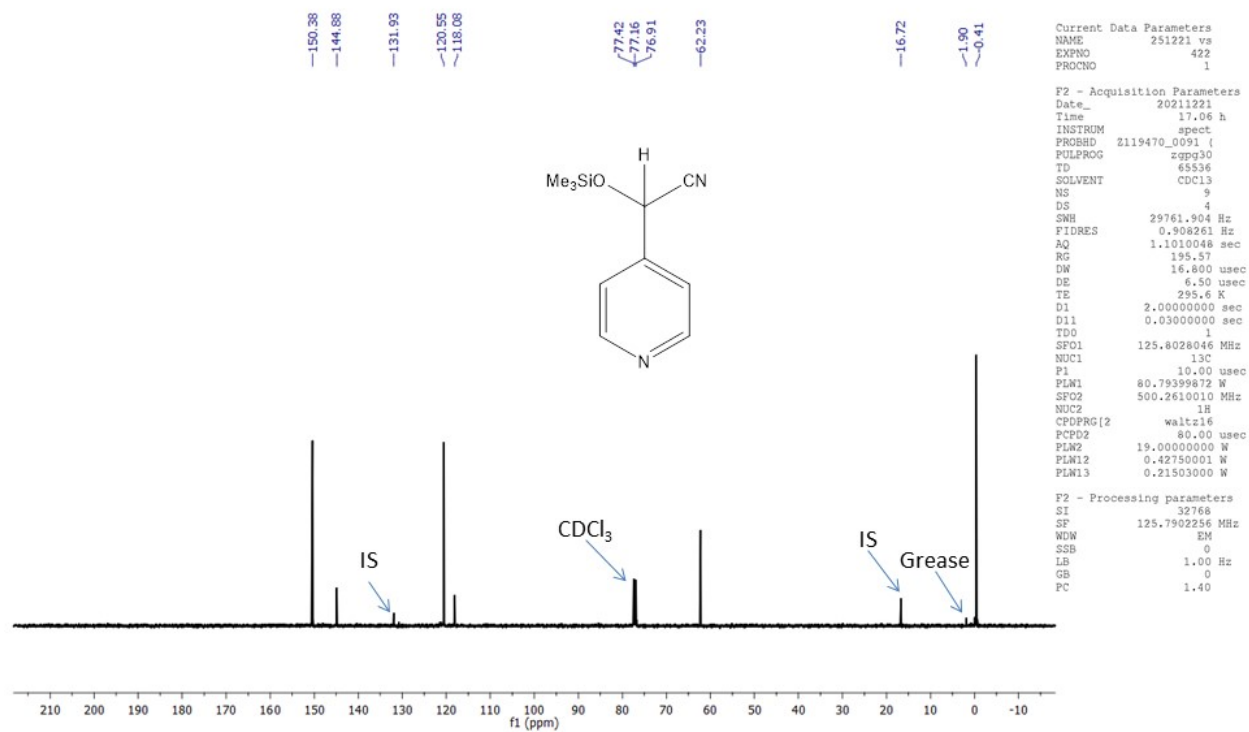

**Figure S580.** <sup>13</sup>C NMR spectrum of the cyanosilylated product of pyridine-4-carbaldehyde.

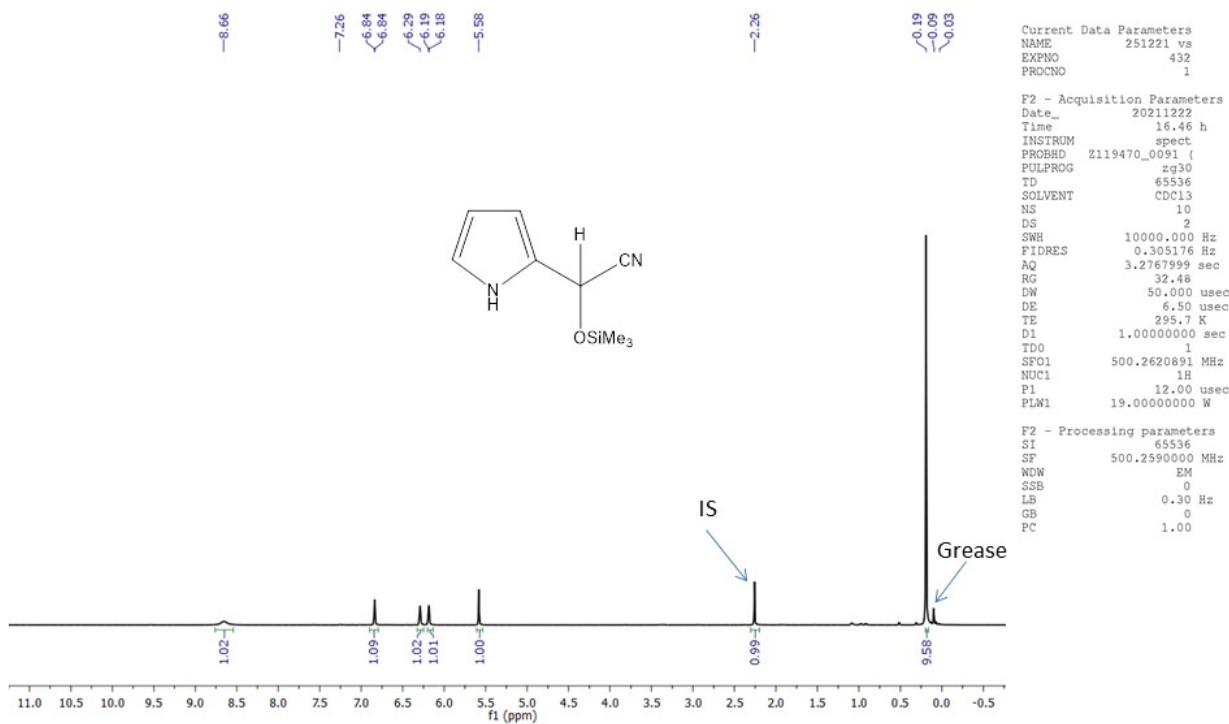

**Figure S7159.** <sup>1</sup>H NMR spectrum of the cyanosilylated product of pyrrole-2-carbaldehyde.

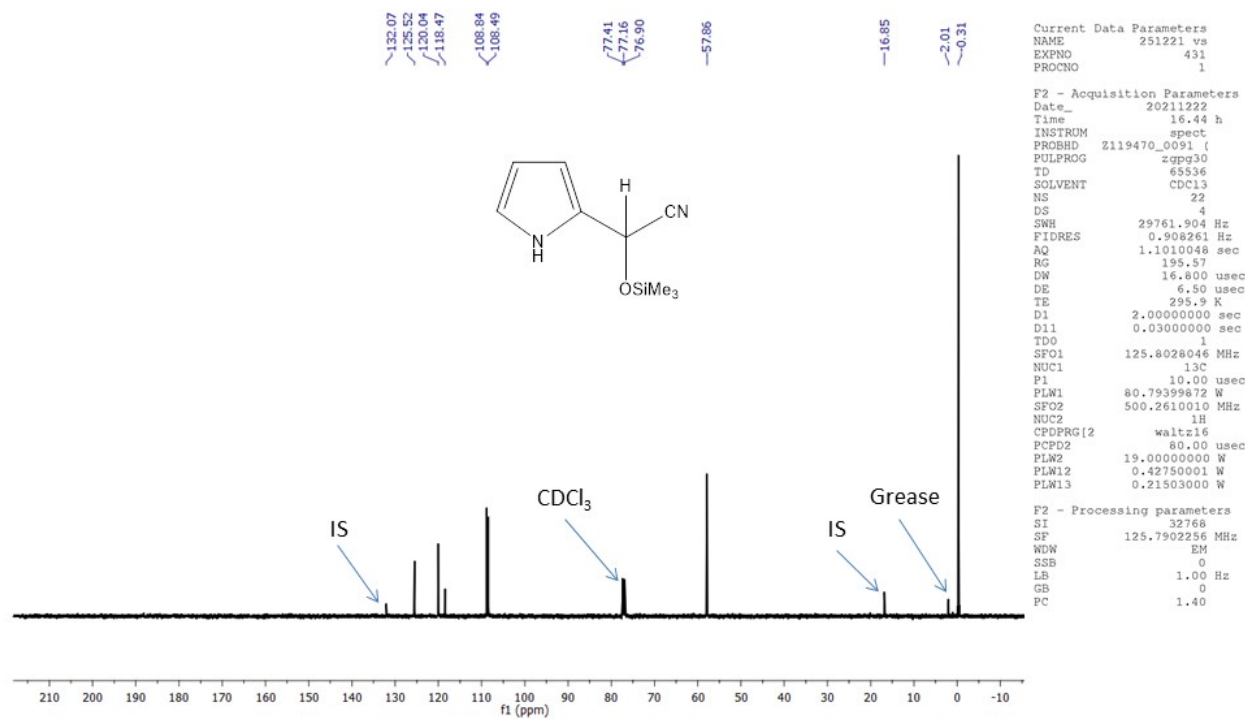

**Figure S72.** <sup>13</sup>C NMR spectrum of the cyanosilylated product of pyrrole-2-carbaldehyde.

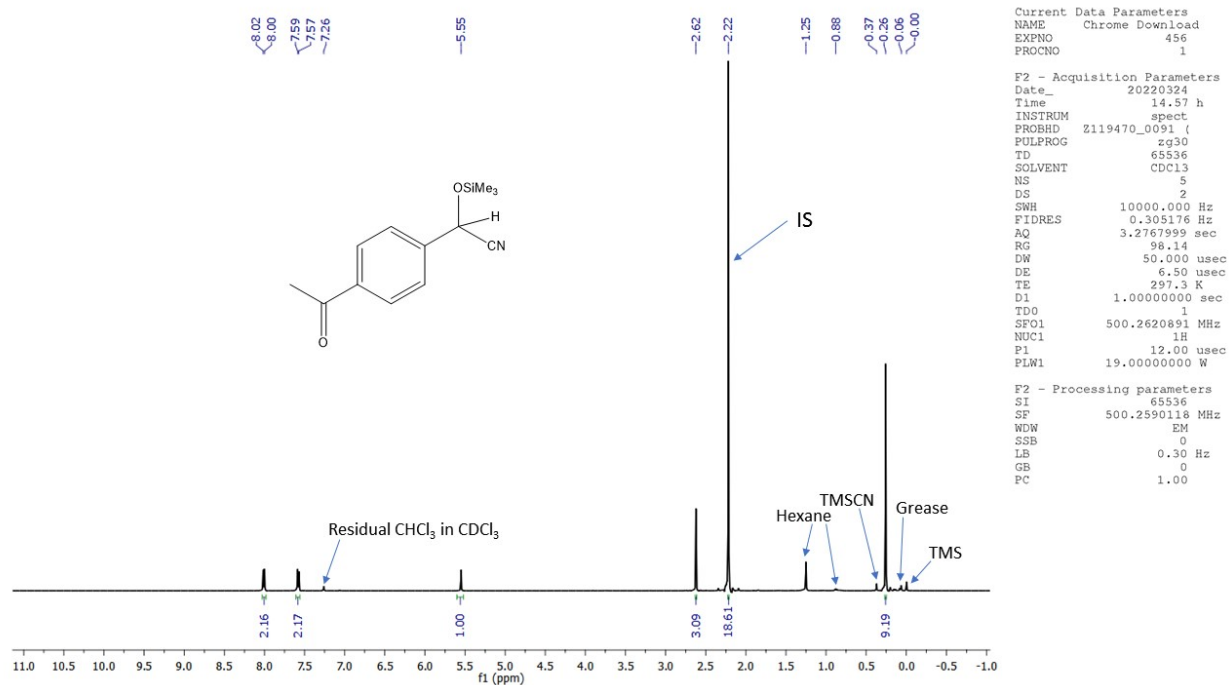

**Figure S60.**  $^1\text{H}$  NMR spectrum of the cyanosilylated product of 4-acetylbenzaldehyde.

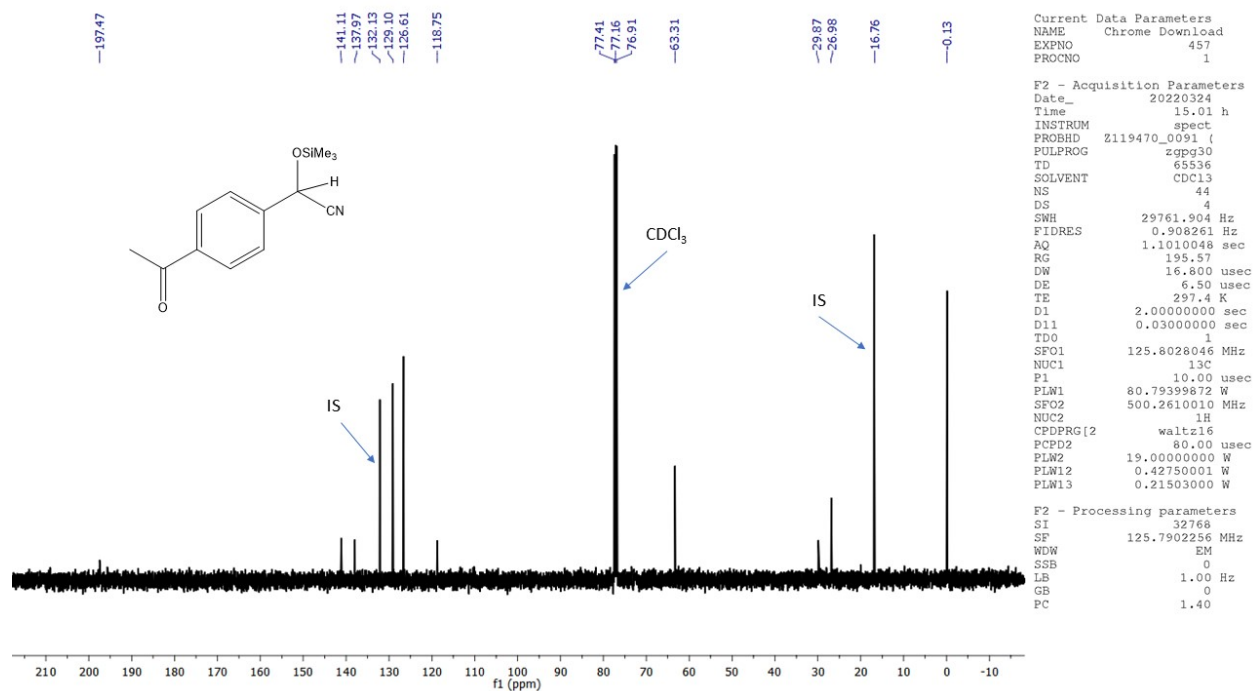

**Figure S61.** <sup>13</sup>C NMR spectrum of the cyanosilylated product of 4-acetylbenzaldehyde.

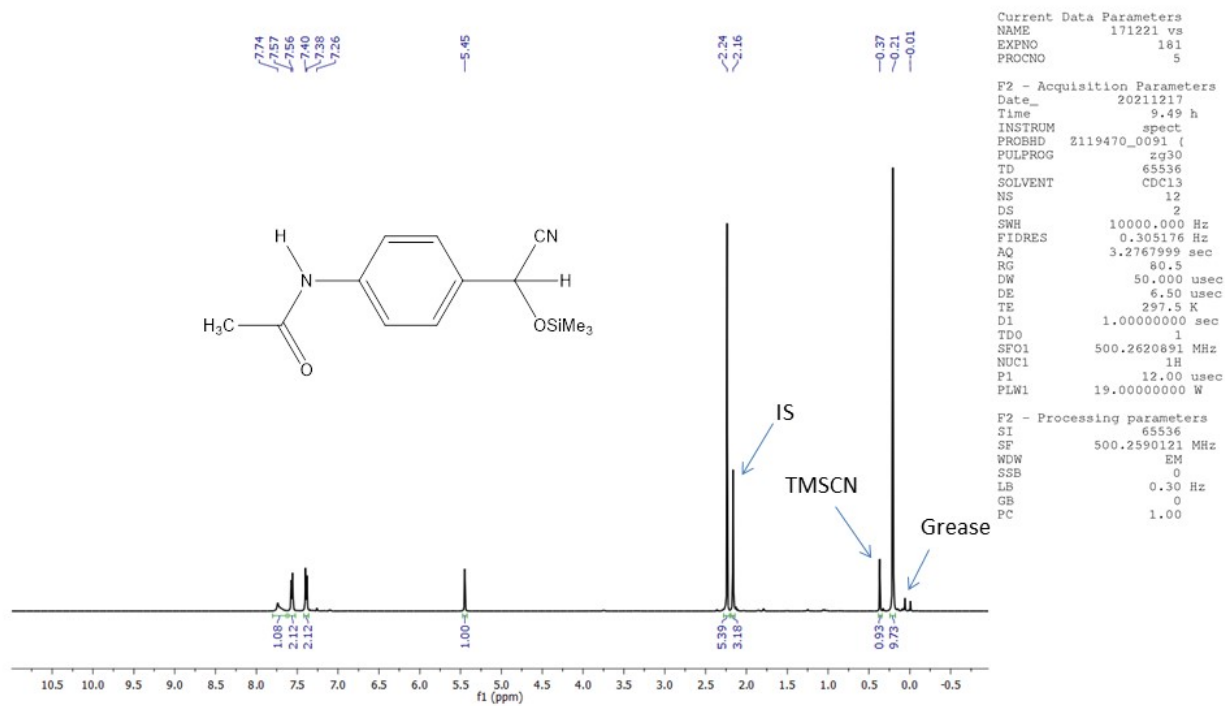

**Figure S62.** <sup>1</sup>H NMR spectrum of the cyanosilylated product of 4-acetamidobenzaldehyde.

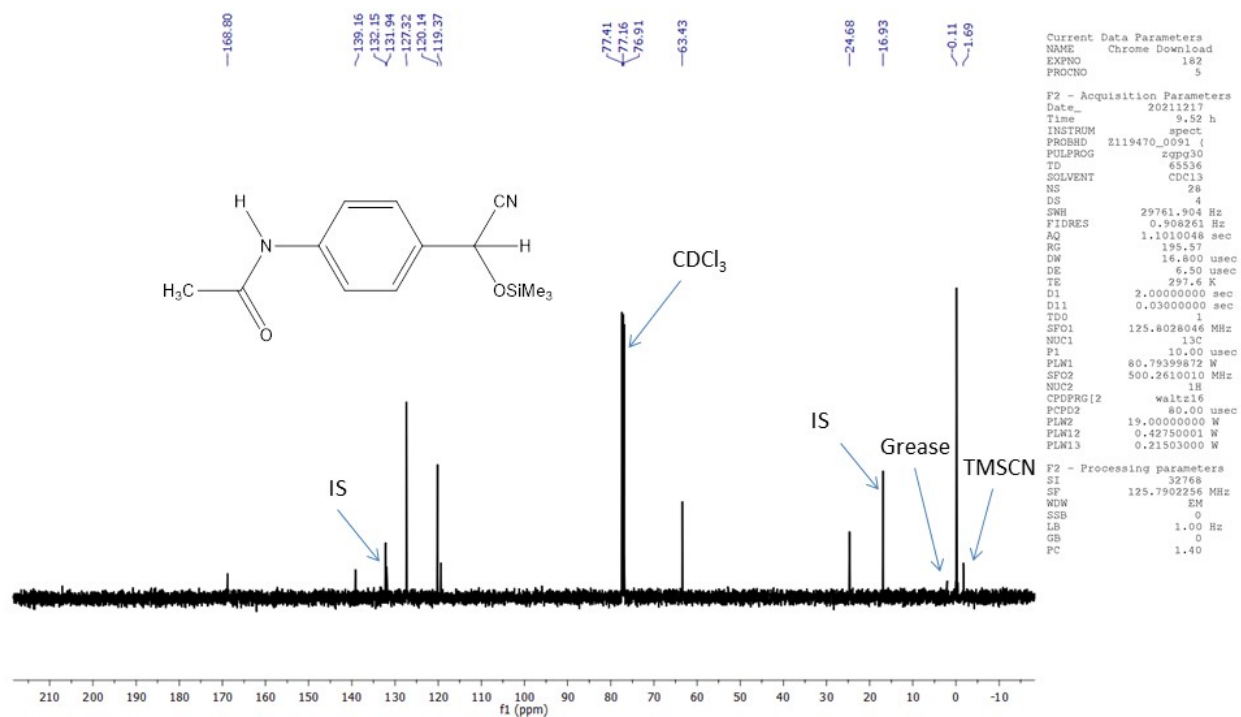

**Figure S63.** <sup>13</sup>C NMR spectrum of the cyanosilylated product of 4-acetamidobenzaldehyde.

## General procedure for the intermolecular chemoselective cyanosilylation using catalyst 5 (eqns 1-3)

Benzaldehyde (1.0 mmol), substrate (1.0 mmol) [acetophenone (eqn 1), benzonitrile (eqn 2), and phenyl benzoate (eqn 3)], TMSCN (1.1 mmol), and catalyst **5** (0.5 mol %) were stirred at 50 °C for required period. The reaction progress was monitored by  $^1\text{H}$  NMR spectroscopy; after the completion of the reaction, a  $^{13}\text{C}$  NMR spectrum was also recorded.

### $^1\text{H}$ and $^{13}\text{C}$ NMR spectra of the reactions shown in eqns 1-3

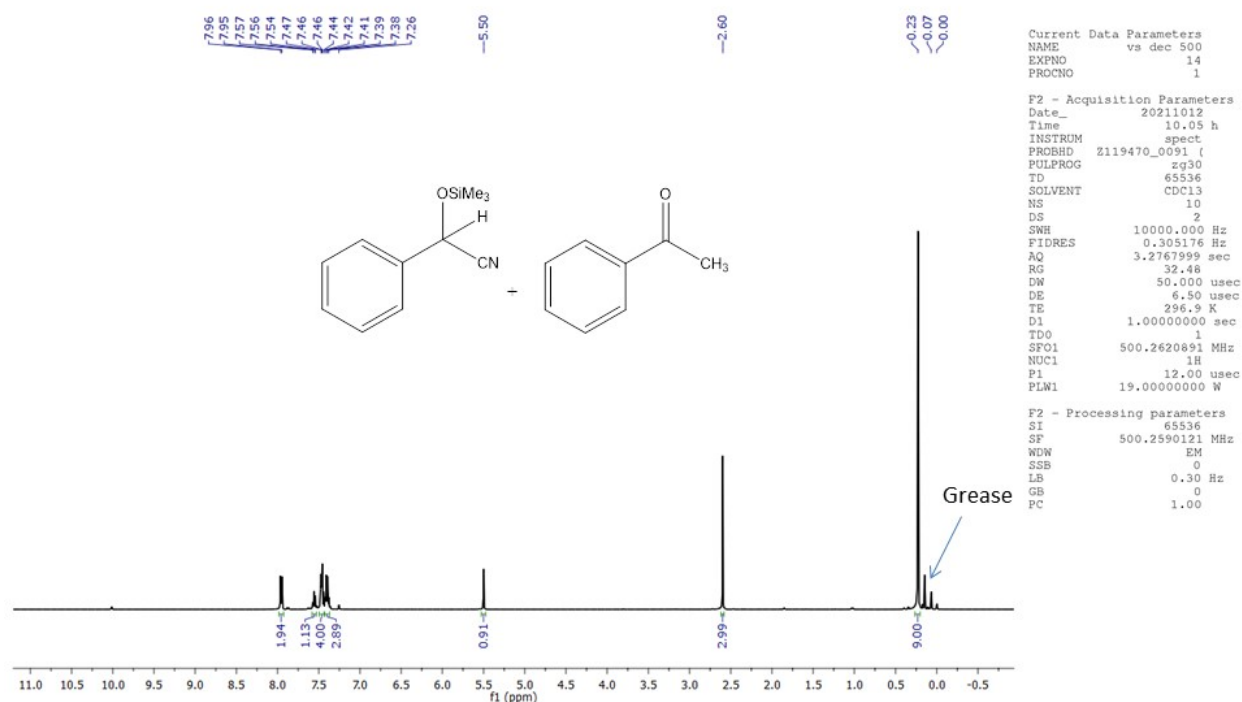

**Figure S64.**  $^1\text{H}$  NMR spectrum of the chemoselective cyanosilylation of benzaldehyde in the presence of acetophenone (eqn 1).

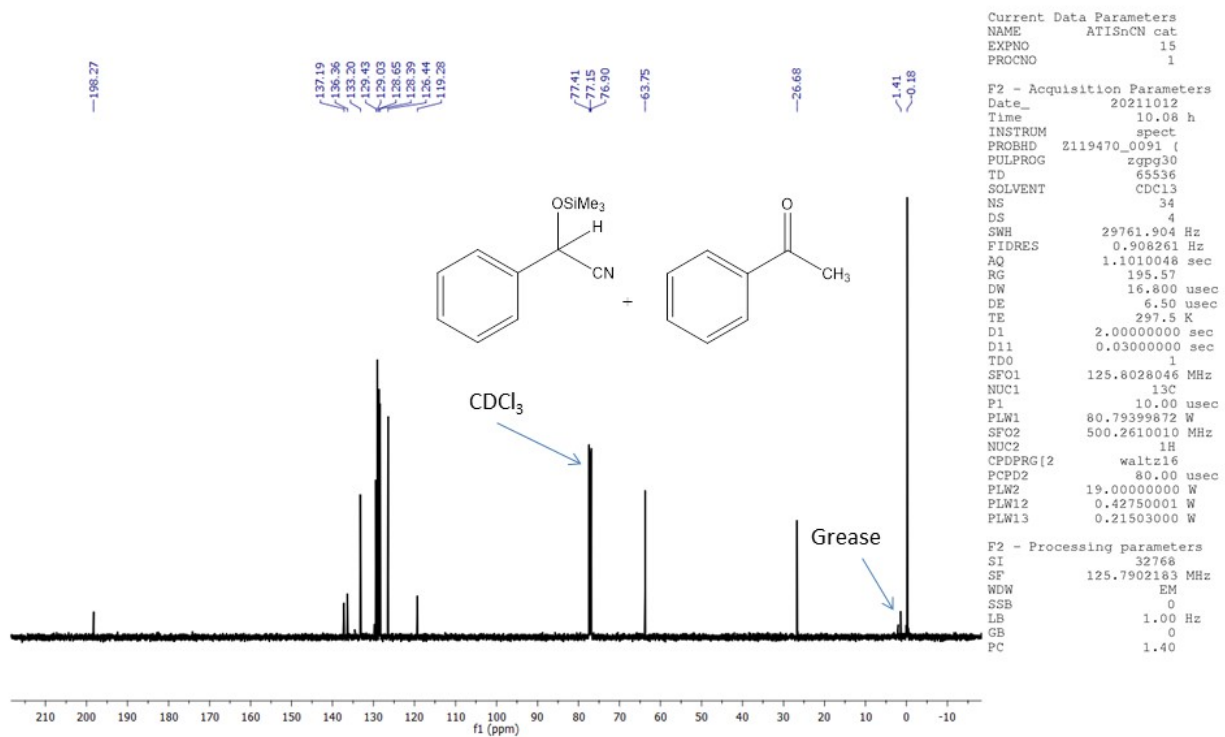

**Figure S65.**  $^{13}\text{C}$  NMR spectrum of the chemoselective cyanosilylation of benzaldehyde in the presence of acetophenone (eqn 1).

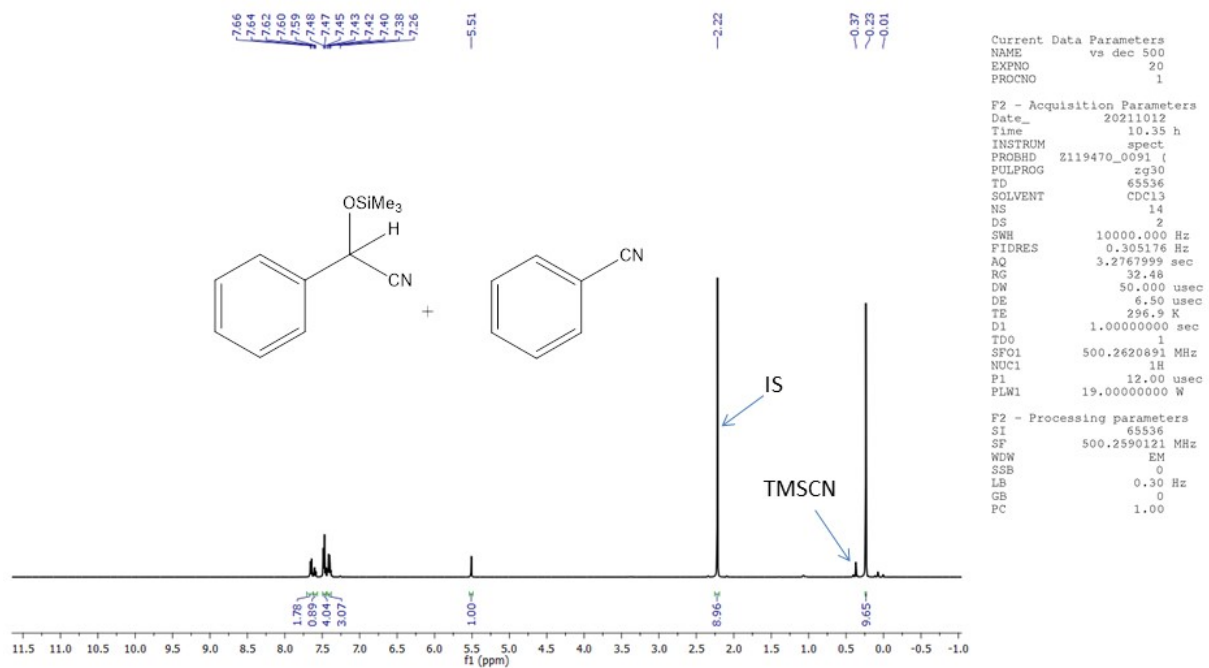

**Figure S66.**  $^1\text{H}$  NMR spectrum of the chemoselective cyanosilylation of benzaldehyde in the presence of benzonitrile (eqn 2).

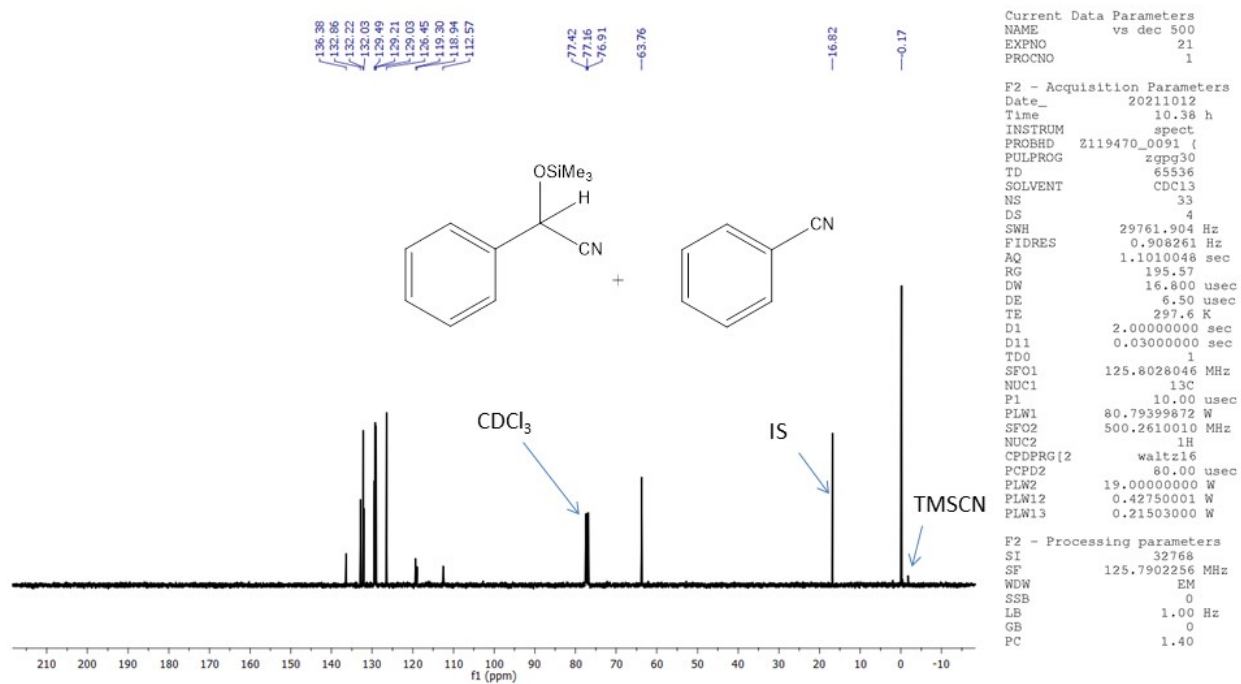

**Figure S80.**  $^{13}\text{C}$  NMR spectrum of the chemoselective cyanosilylation of benzaldehyde in the presence of benzonitrile (eqn 2).

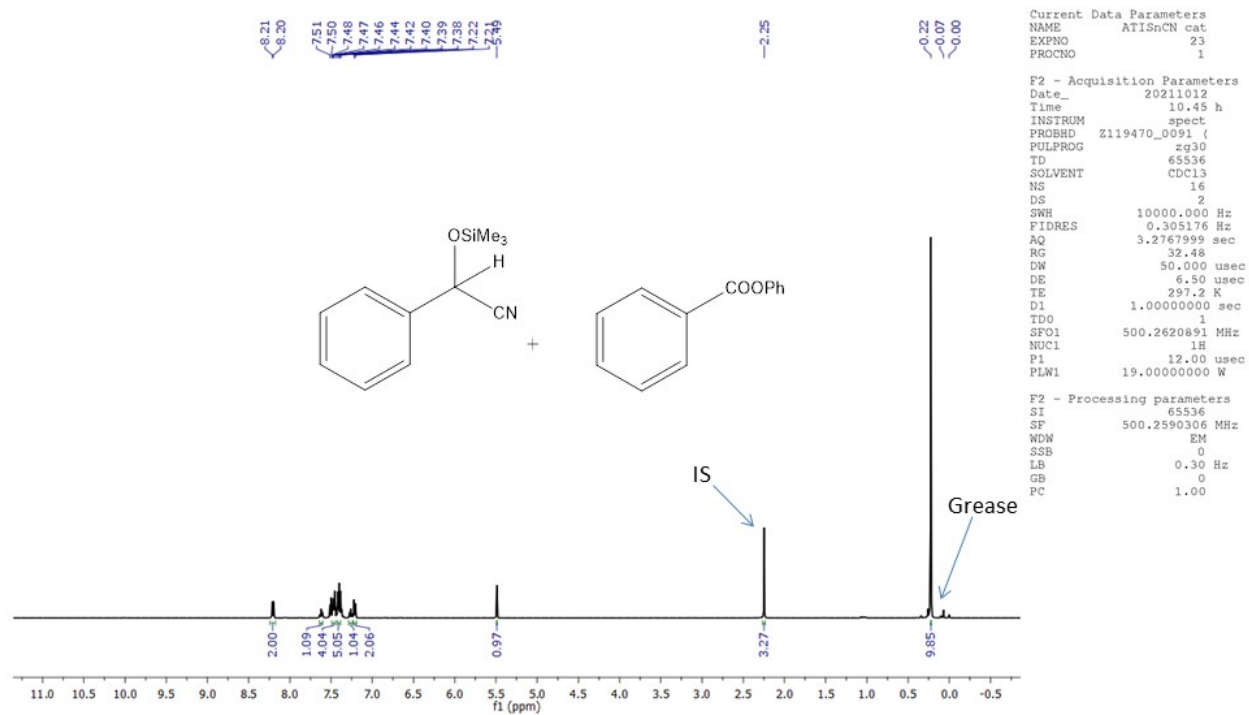

**Figure S67.** <sup>1</sup>H NMR spectrum of the chemoselective cyanosilylation of benzaldehyde in the presence of phenyl benzoate (eqn 3).

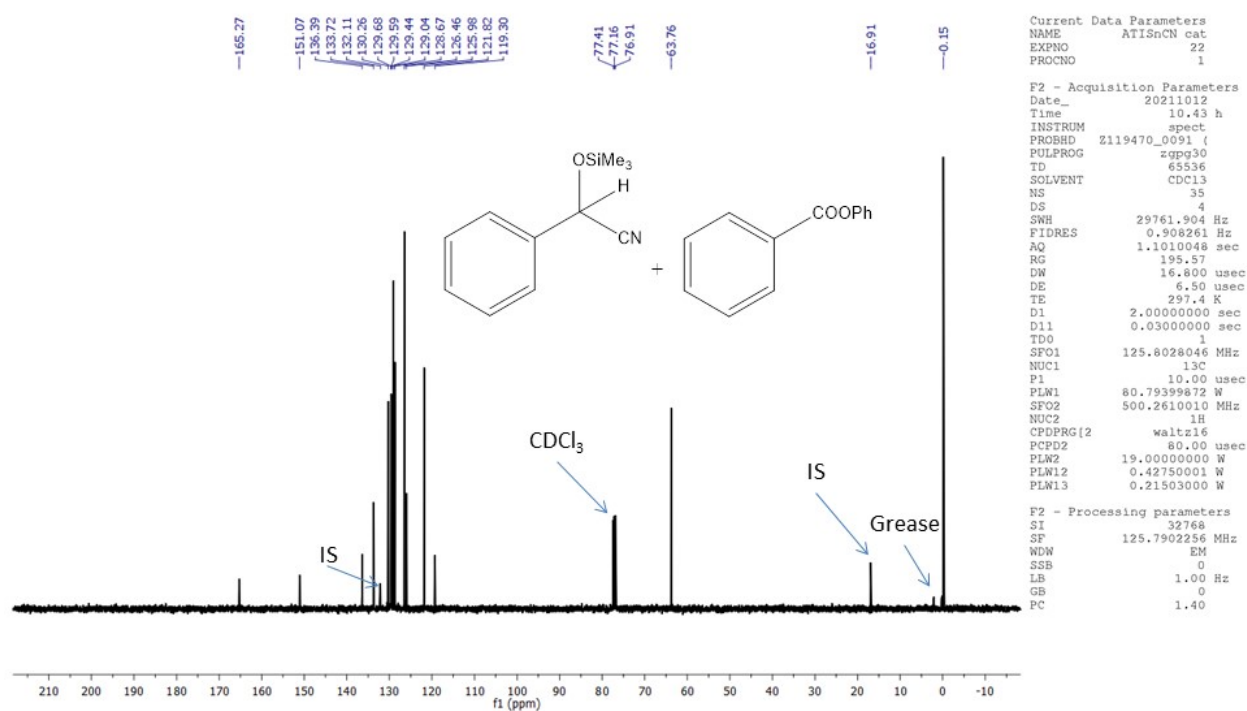

**Figure S82.**  $^{13}\text{C}$  NMR spectrum of the chemoselective cyanosilylation of benzaldehyde in the presence of phenyl benzoate (eqn 3).

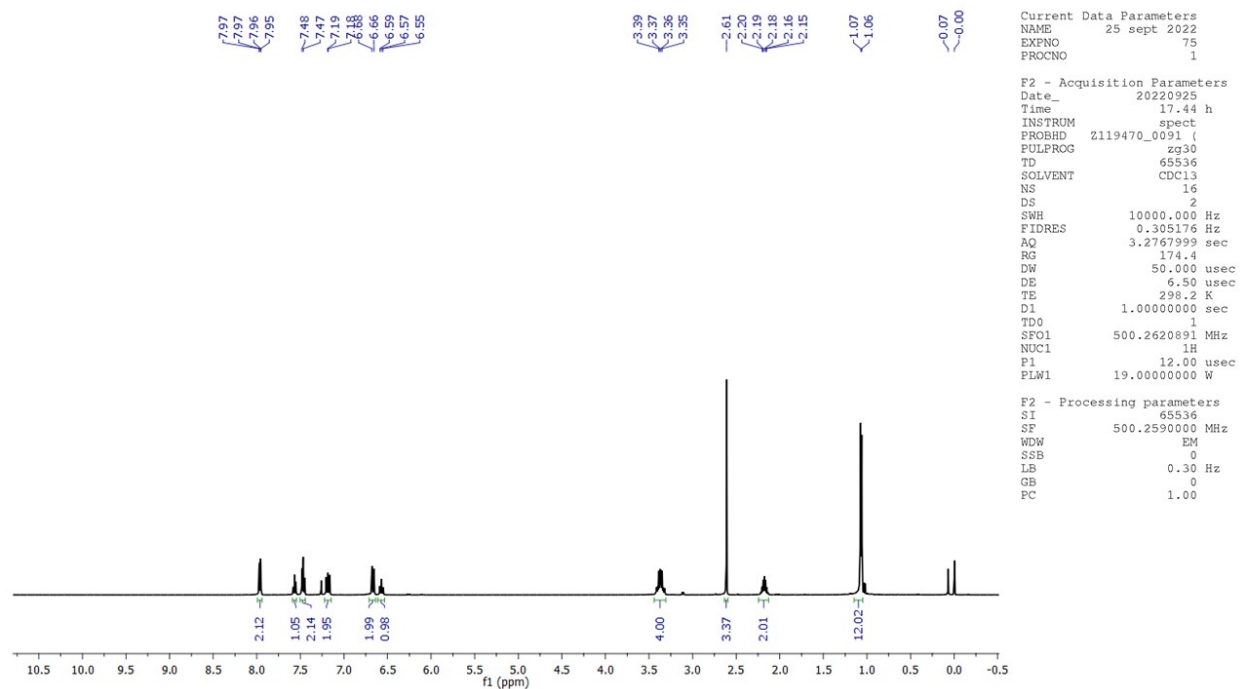

**Figure S83.**  $^1\text{H}$  NMR spectrum of the equimolar reaction of compound **5** with acetophenone. The spectrum was recorded after 4 h of adding acetophenone.

**Table S2. The equimolar reactions of catalyst 5 with hexanaldehyde, benzaldehyde, 4-chlorobenzaldehyde, and 2,6-dichlorobenzaldehyde to afford cyanostannylated products S1, S2, S3, and S4, respectively\***

| Entry | Reaction                                                                                                                                                               |
|-------|------------------------------------------------------------------------------------------------------------------------------------------------------------------------|
| 1     | 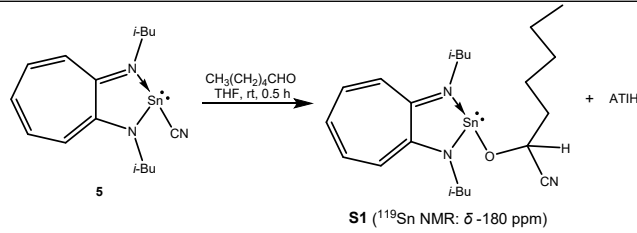 <p><b>S1</b> (<math>^{119}\text{Sn}</math> NMR: <math>\delta</math> -180 ppm)</p>   |
| 2     | 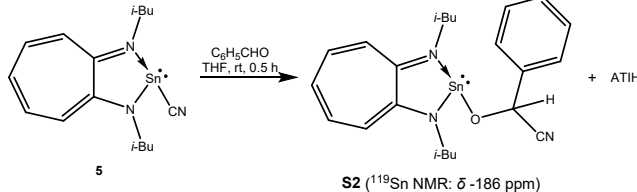 <p><b>S2</b> (<math>^{119}\text{Sn}</math> NMR: <math>\delta</math> -186 ppm)</p>   |
| 3     | 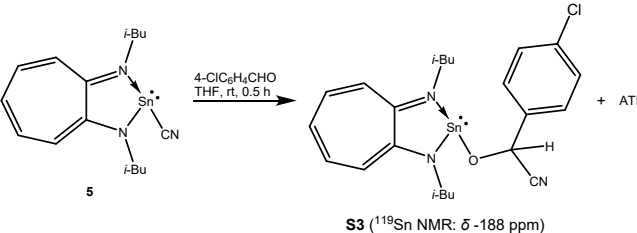 <p><b>S3</b> (<math>^{119}\text{Sn}</math> NMR: <math>\delta</math> -188 ppm)</p>  |
| 4     | 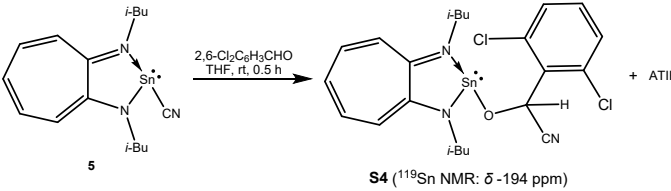 <p><b>S4</b> (<math>^{119}\text{Sn}</math> NMR: <math>\delta</math> -194 ppm)</p> |

\*Unreacted aldehyde is also seen. The separation of the cyanostannylated products from these mixtures was predominantly not feasible as the individual components have similar solubility.

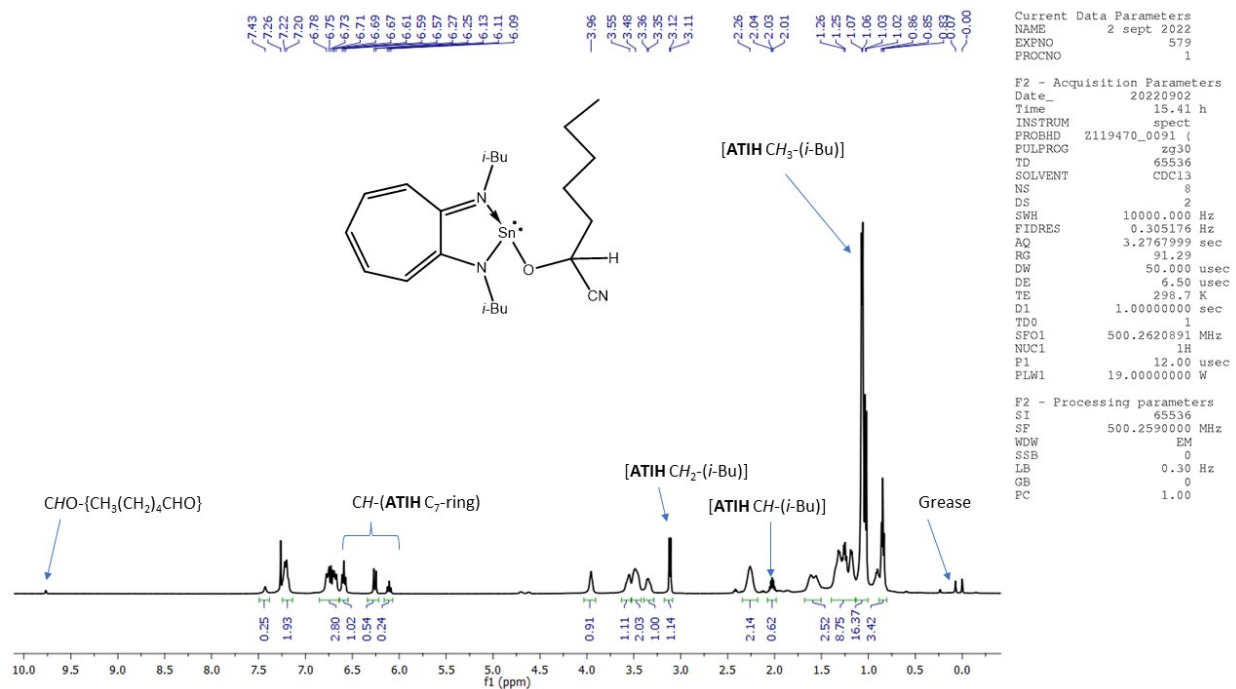

**Figure S84.**  $^1\text{H}$  NMR spectrum of the equimolar reaction of compound **5** with hexanaldehyde. The spectrum was recorded after 0.5 h of adding hexanaldehyde.

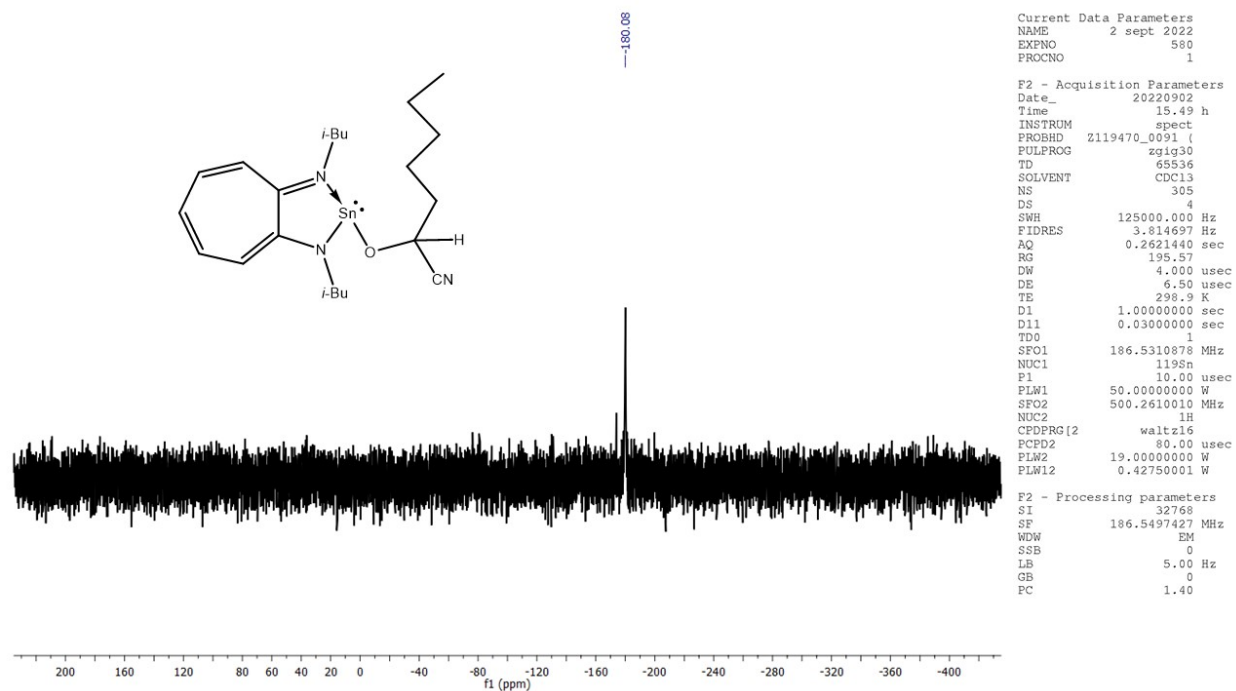

**Figure S85.**  $^{119}\text{Sn}$  NMR spectrum of the equimolar reaction of compound **5** with hexanaldehyde. The spectrum was recorded after 0.5 h of adding hexanaldehyde.

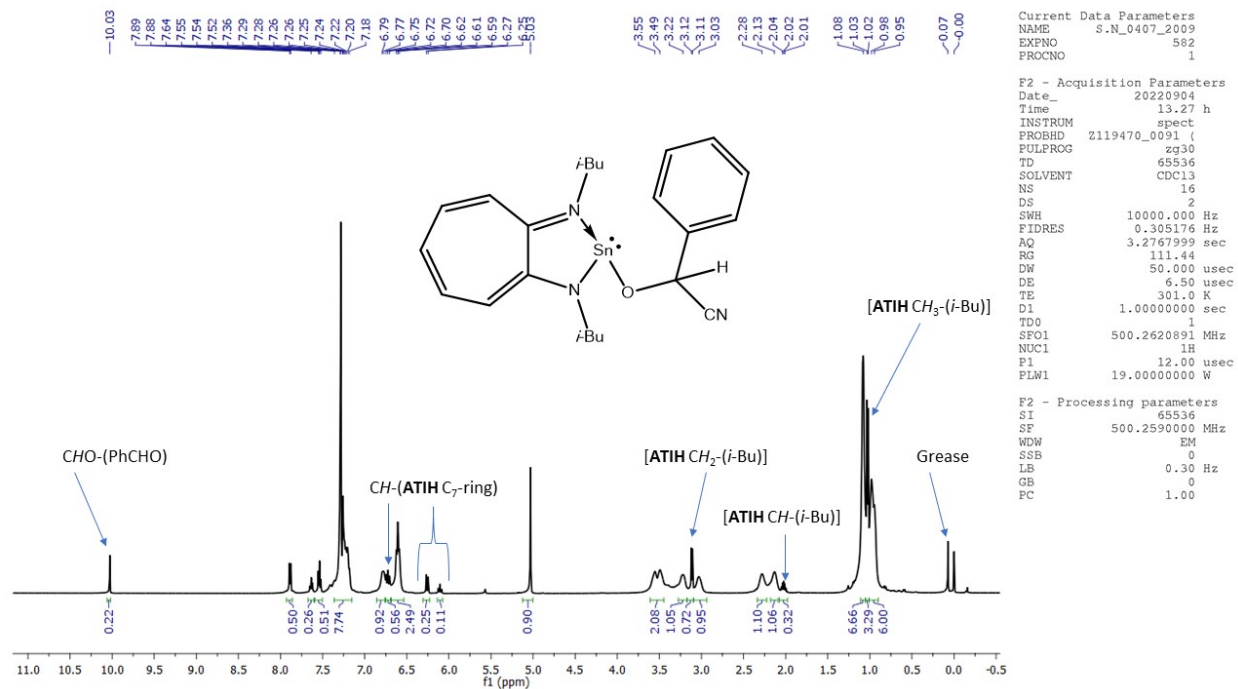

**Figure S86.**  $^1\text{H}$  NMR spectrum of the equimolar reaction of compound **5** with benzaldehyde. The spectrum was recorded after 0.5 h of adding benzaldehyde.

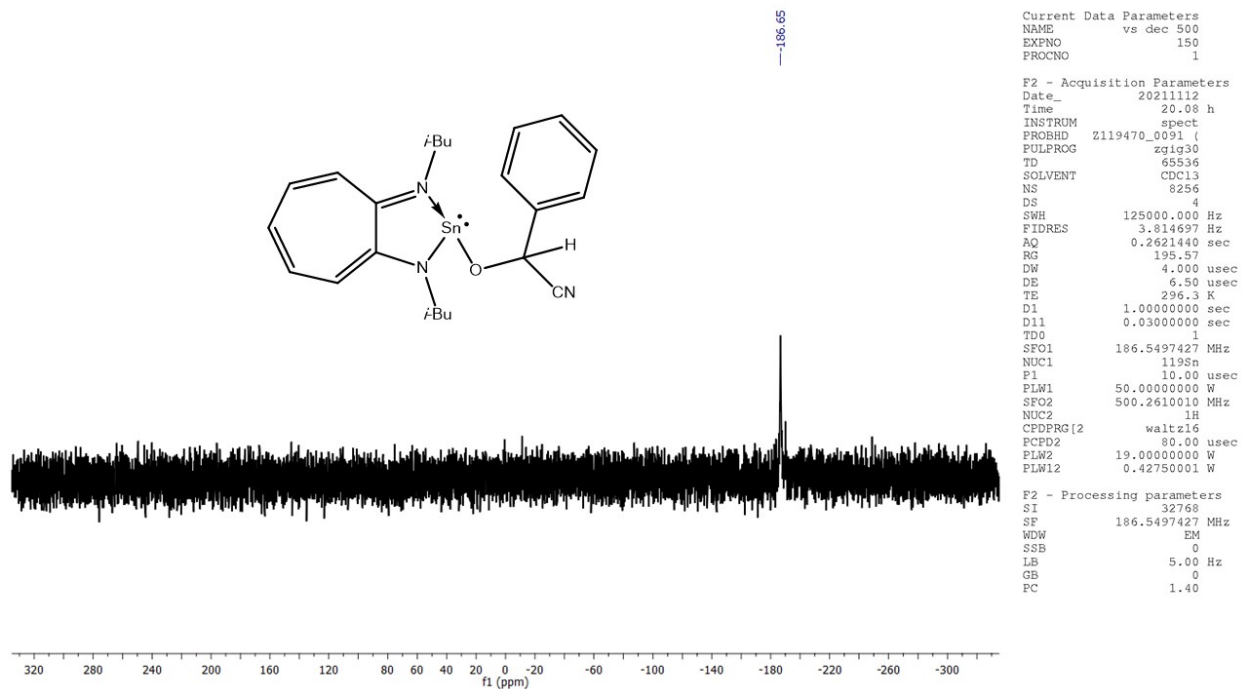

**Figure S87.** <sup>119</sup>Sn NMR spectrum of the equimolar reaction of compound **5** with benzaldehyde. The spectrum was recorded after 0.5 h of adding benzaldehyde.

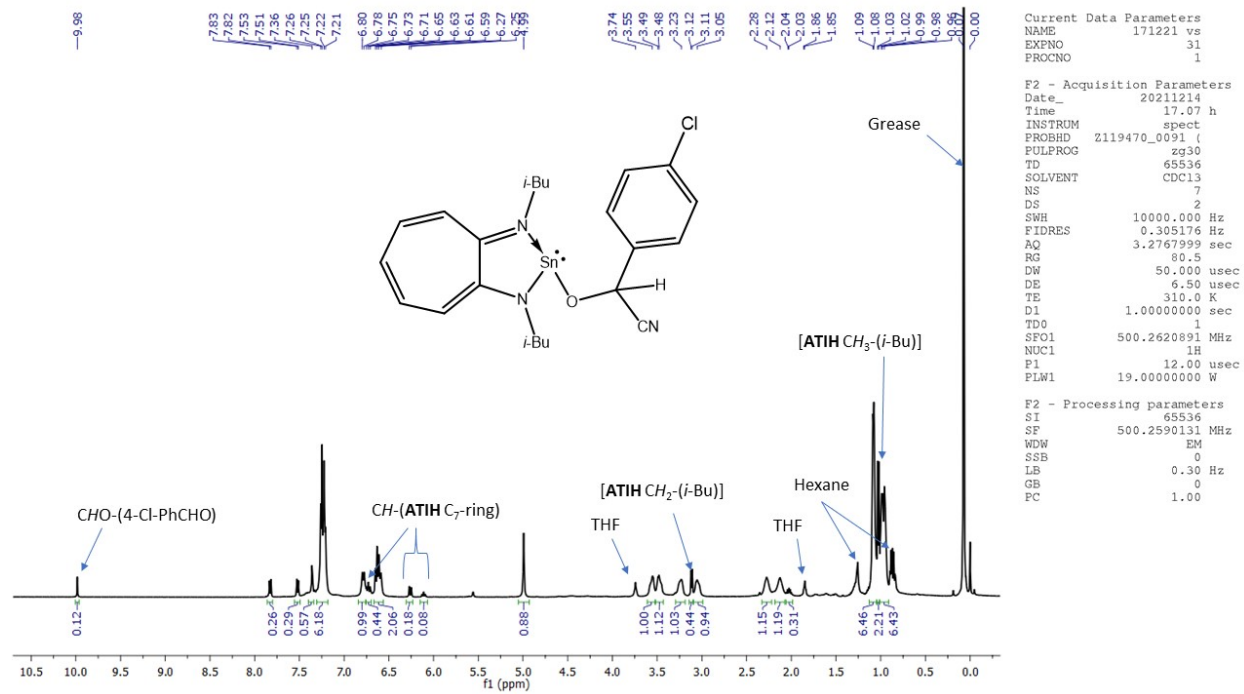

**Figure S88.**  $^1\text{H}$  NMR spectrum of the equimolar reaction of compound 5 with 4-chlorobenzaldehyde. The spectrum was recorded after 0.5 h of adding 4-chlorobenzaldehyde.

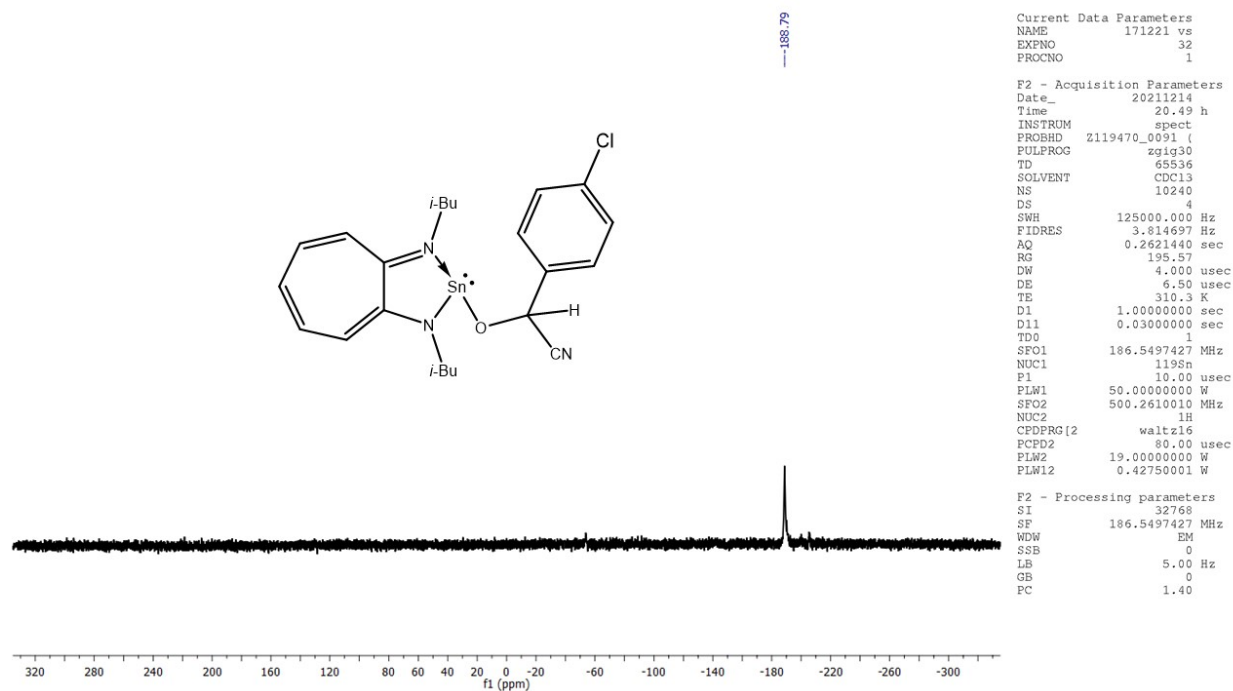

**Figure S89.**  $^{119}\text{Sn}$  NMR spectrum of the equimolar reaction of compound **5** with 4-chlorobenzaldehyde. The spectrum was recorded after 0.5 h of adding 4-chlorobenzaldehyde.

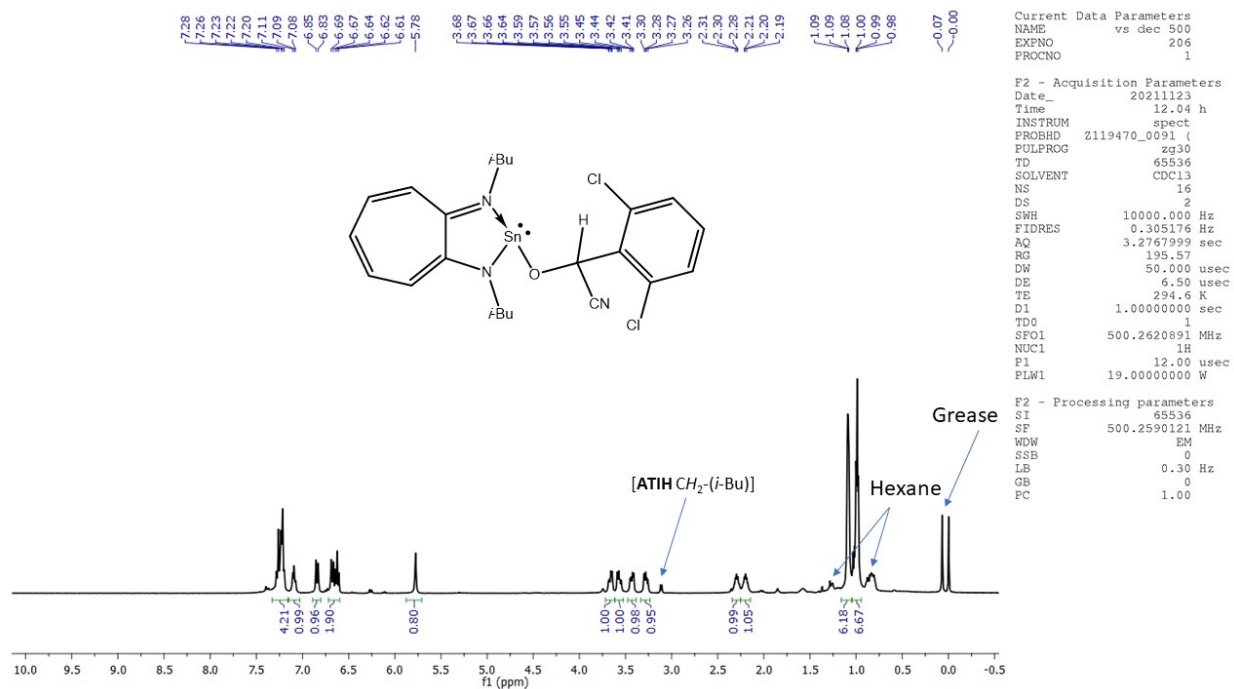

**Figure S90.** <sup>1</sup>H NMR spectrum of the equimolar reaction of compound **5** with 2,6-dichlorobenzaldehyde. The spectrum was recorded after 0.5 h of adding 2,6-dichlorobenzaldehyde.

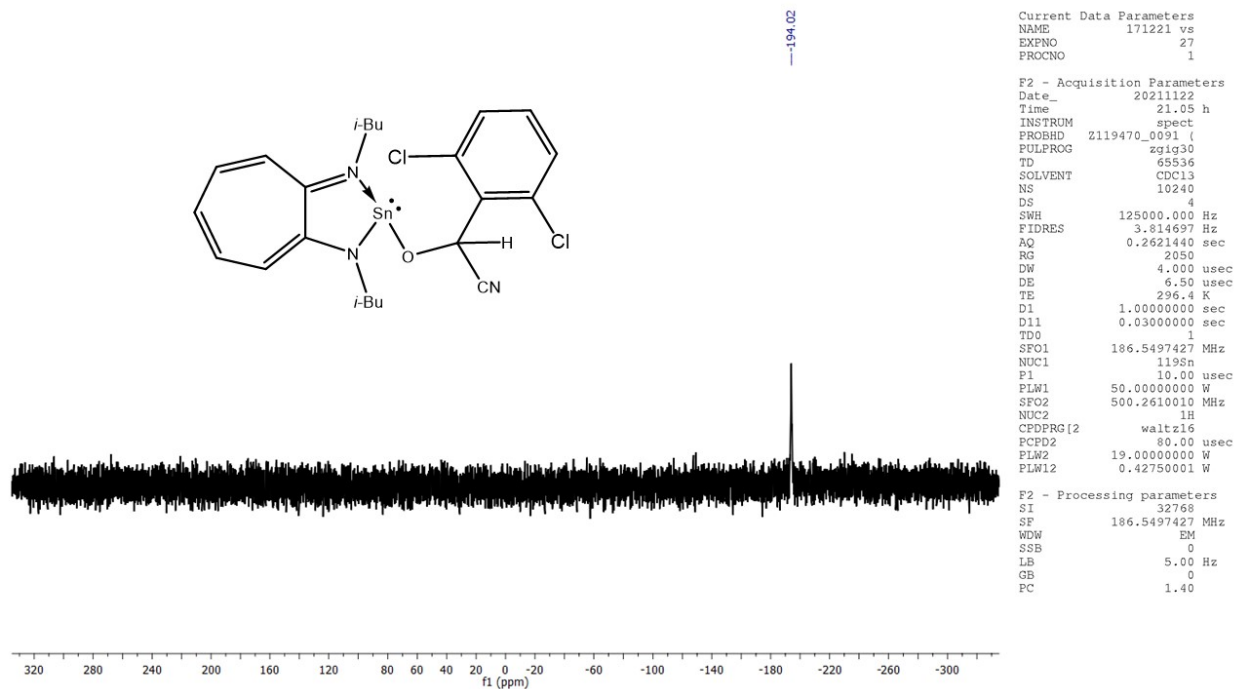

**Figure S91.**  $^{119}\text{Sn}$  NMR spectrum of the equimolar reaction of compound **5** with 2,6-dichlorobenzaldehyde. The spectrum was recorded after 0.5 h of adding 2,6-dichlorobenzaldehyde.

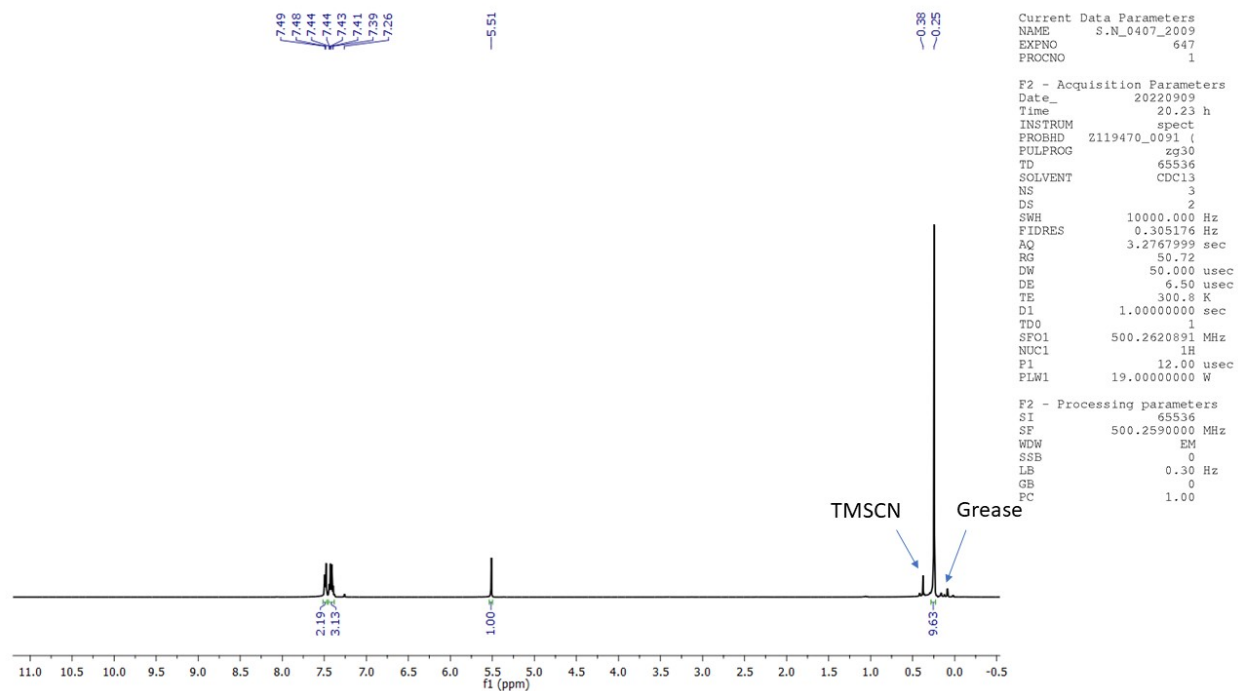

**Figure S92.** The  $^1\text{H}$  NMR spectrum of the reaction of benzaldehyde with TMSCN at 50 °C in the presence of 0.5 mol% of compound **6**

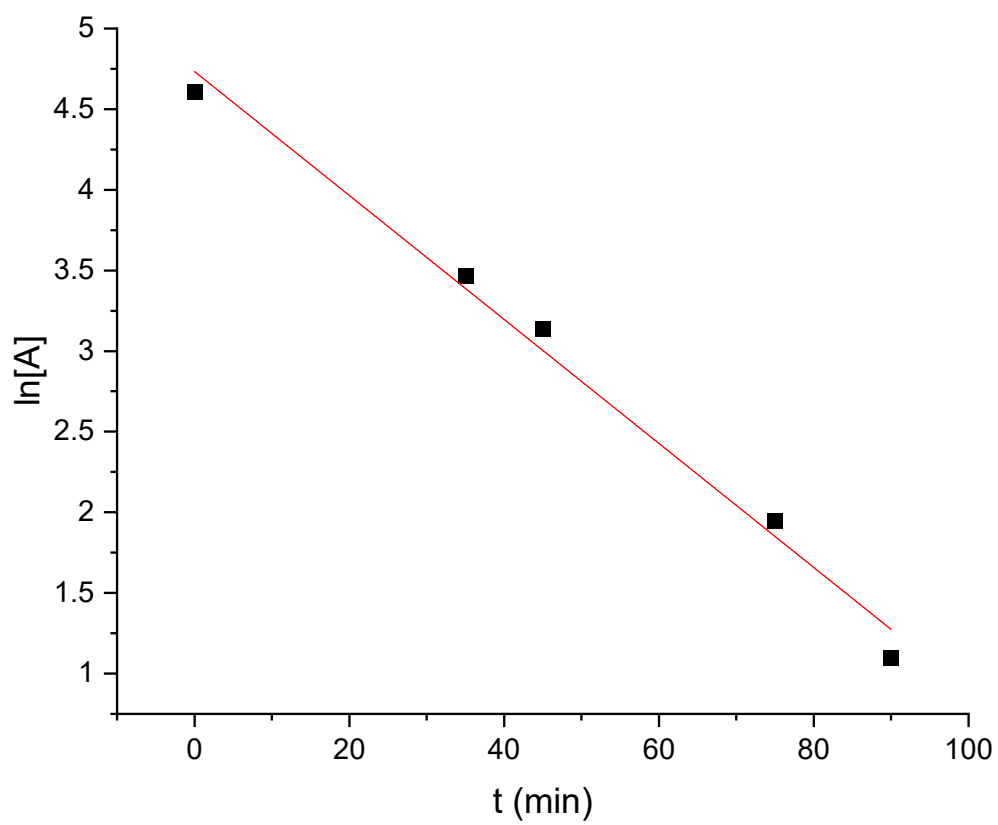

**Figure S93.** Plot of  $\ln[A]$  versus  $t$  for the benzaldehyde cyanosilylation done at 40 °C.

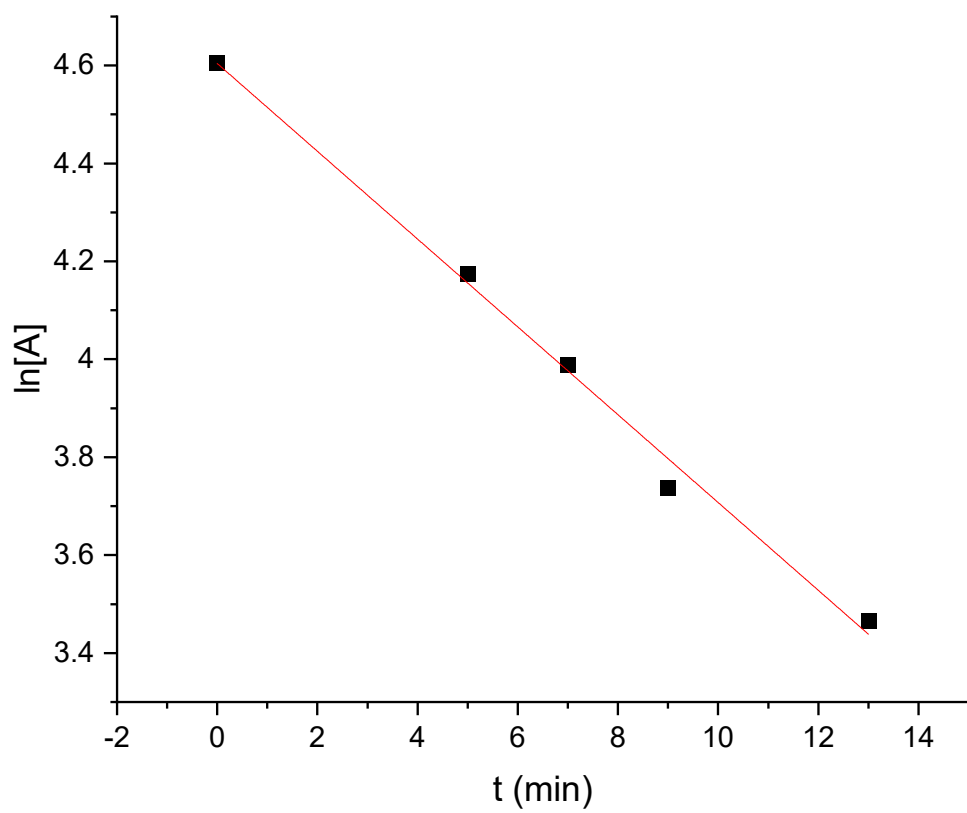

**Figure S94.** Plot of  $\ln[A]$  versus  $t$  for the benzaldehyde cyanosilylation done at 50 °C.

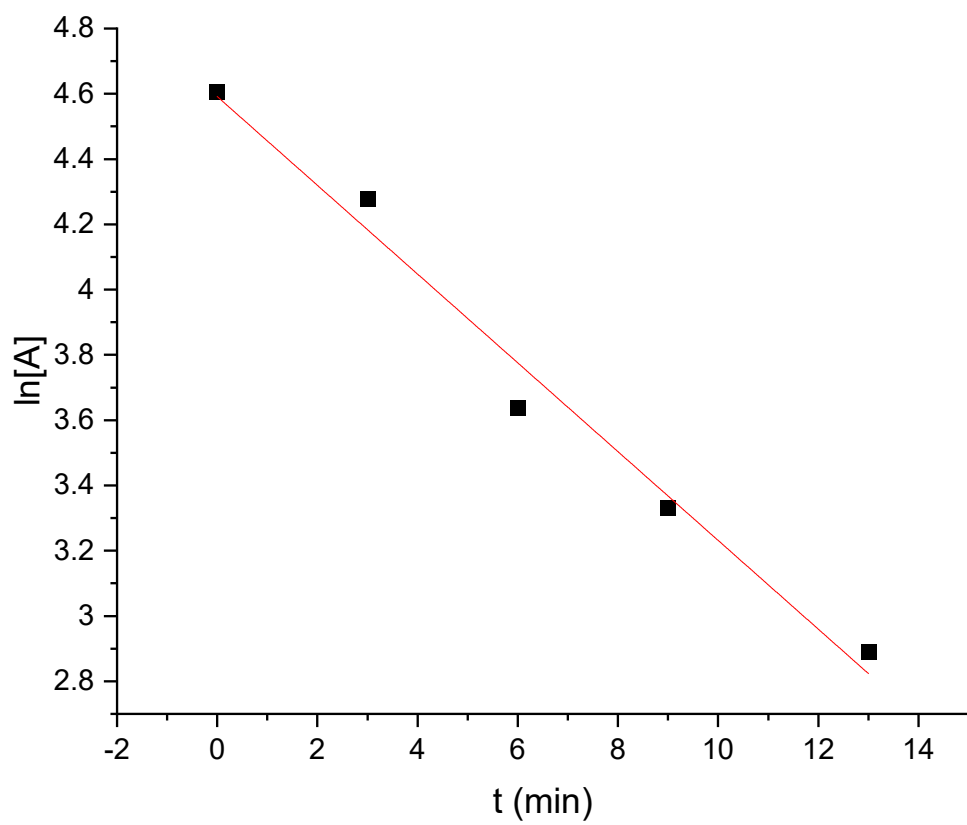

**Figure S95.** Plot of  $\ln[A]$  versus  $t$  for the benzaldehyde cyanosilylation done at 60 °C.

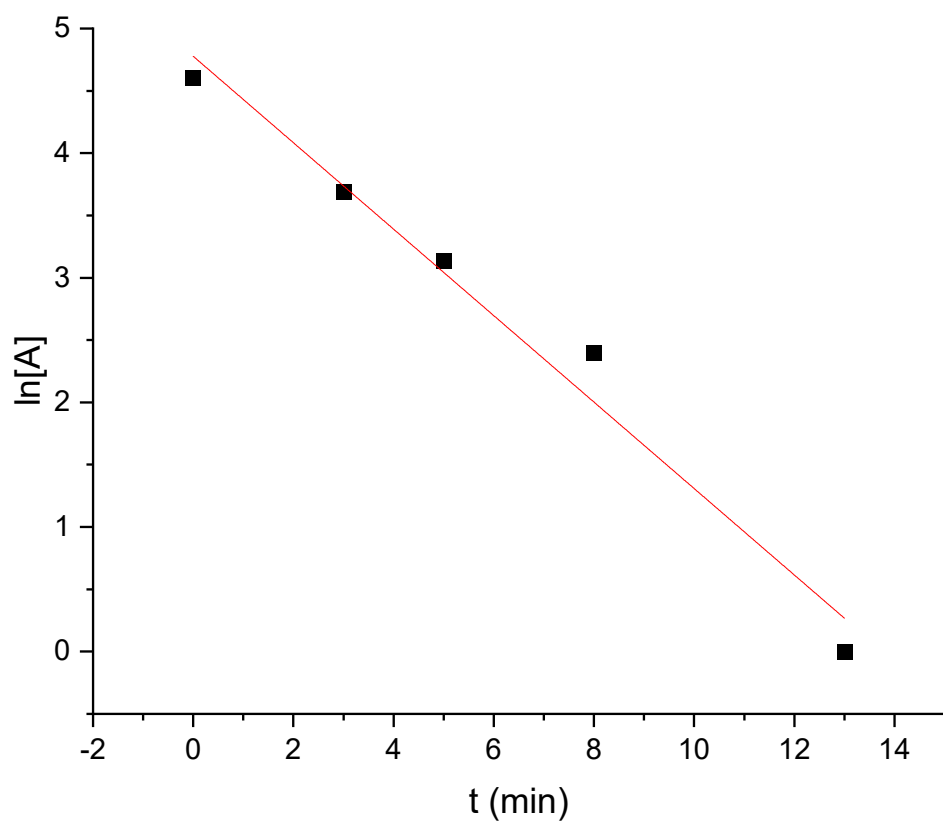

**Figure S96.** Plot of  $\ln[A]$  versus  $t$  for the benzaldehyde cyanosilylation done at 70 °C.

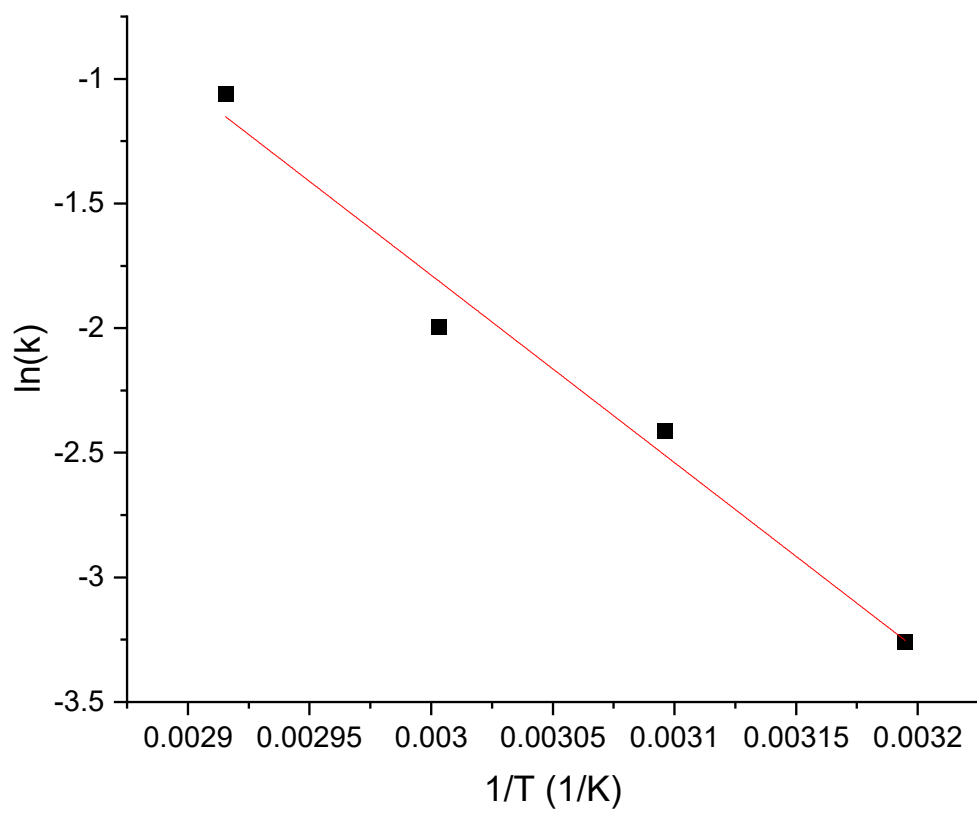

**Figure S97.** The Arrhenius plot of  $\ln(k)$  versus  $1/T$ . From the slope, the activation energy was found to be 62(6) kJ/mol.

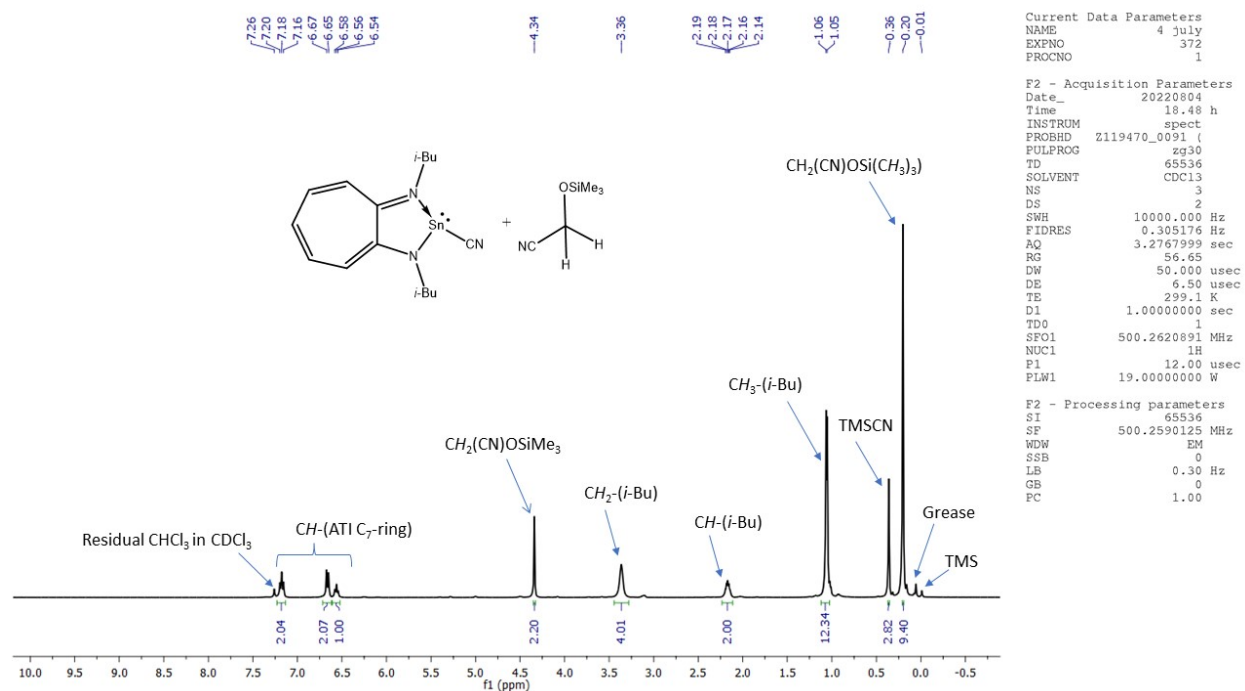

**Figure S98.** <sup>1</sup>H NMR spectrum of the reaction of compound **6** with TMSCN to afford cyanosilylated product **7** and catalyst **5**. The spectrum was recorded after 0.5 h from adding a slight excess TMSCN to compound **6**.
